# Supplementary material for: Journey to multimorbidity: longitudinal analysis exploring cardiovascular risk factors and sociodemographic determinants in an urban setting
Source: PubMed Central journal article supplement — BMJ Open. 2019 Dec 23;9(12):e031649. doi: 10.1136/bmjopen-2019-031649 (PMC7008443; doi:10.1136/bmjopen-2019-031649), 2019-12-23
Supplement: bmjopen-2019-031649.draft_revisions.pdf [file bmjopen-2019-031649.draft_revisions.pdf]

# BMJ Open

BMJ Open is committed to open peer review. As part of this commitment we make the peer review history of every article we publish publicly available.

When an article is published we post the peer reviewers' comments and the authors' responses online. We also post the versions of the paper that were used during peer review. These are the versions that the peer review comments apply to.

The versions of the paper that follow are the versions that were submitted during the peer review process. They are not the versions of record or the final published versions. They should not be cited or distributed as the published version of this manuscript.

BMJ Open is an open access journal and the full, final, typeset and author-corrected version of record of the manuscript is available on our site with no access controls, subscription charges or pay-per-view fees (<http://bmjopen.bmj.com>).

If you have any questions on BMJ Open's open peer review process please email [info.bmjopen@bmj.com](mailto:info.bmjopen@bmj.com)

# BMJ Open

## The journey to multimorbidity: a longitudinal study in an urban setting

|                               |                                                                                                                                                                                                                                                                                                                                                                                                                                                                                                                                                                                                                                                                                              |
|-------------------------------|----------------------------------------------------------------------------------------------------------------------------------------------------------------------------------------------------------------------------------------------------------------------------------------------------------------------------------------------------------------------------------------------------------------------------------------------------------------------------------------------------------------------------------------------------------------------------------------------------------------------------------------------------------------------------------------------|
| Journal:                      | <i>BMJ Open</i>                                                                                                                                                                                                                                                                                                                                                                                                                                                                                                                                                                                                                                                                              |
| Manuscript ID                 | bmjopen-2019-031649                                                                                                                                                                                                                                                                                                                                                                                                                                                                                                                                                                                                                                                                          |
| Article Type:                 | Research                                                                                                                                                                                                                                                                                                                                                                                                                                                                                                                                                                                                                                                                                     |
| Date Submitted by the Author: | 14-May-2019                                                                                                                                                                                                                                                                                                                                                                                                                                                                                                                                                                                                                                                                                  |
| Complete List of Authors:     | Ashworth, Mark; King's College London Faculty of Life Sciences and Medicine, School of Population Health & Environmental Sciences<br>Durbaba, Stevo; King's College London Faculty of Life Sciences and Medicine, School of Population Health & Environmental Sciences<br>Whitney, David; King's College London Faculty of Life Sciences and Medicine, School of Population Health & Environmental Sciences<br>Crompton, James; London Borough of Lambeth, Public Health, Adults and Health<br>Wright, Michael; King's College London Faculty of Life Sciences and Medicine, School of Population Health & Environmental Sciences<br>Dodhia, Hiten; London Borough of Lambeth, Public Health |
| Keywords:                     | PRIMARY CARE, Multimorbidity, Demographic factors, Risk factors                                                                                                                                                                                                                                                                                                                                                                                                                                                                                                                                                                                                                              |
|                               |                                                                                                                                                                                                                                                                                                                                                                                                                                                                                                                                                                                                                                                                                              |

SCHOLARONE™  
Manuscripts

**TITLE:**

The journey to multimorbidity: a longitudinal study in an urban setting

**AUTHORS:**

Mark Ashworth<sup>1</sup>, Stevo Durbaba<sup>2</sup>, David Whitney<sup>3</sup>, James Crompton<sup>4</sup>, Michael Wright<sup>5</sup> Hiten Dodhia<sup>6</sup>.

1. Reader in Primary Care, School of Population Health & Environmental Sciences, King's College London, London, UK
2. e-Resources Developer, School of Population Health & Environmental Sciences, King's College London, London, UK
3. Data Analyst, School of Population Health & Environmental Sciences, King's College London, London, UK
4. Head of Health Intelligence, Public Health, Adults and Health, London Borough of Lambeth, London, UK
5. Project Manager, School of Population Health & Environmental Sciences, King's College London, London, UK
6. Consultant in Public Health, London Borough of Lambeth, London, UK

Corresponding author email: mark.ashworth@kcl.ac.uk

Word count: 3187

**ABSTRACT**

**Objective.** To study the social determinants and risk factors for multimorbidity and the acquisition sequence of multimorbidity.

**Design.** Cross-sectional analysis and longitudinal study based on anonymised primary care data.

**Setting.** General practices in an urban multi-ethnic borough in London, UK.

**Participants.** 332,353 patients aged  $\geq 18$  years

**Main outcome measures.** Clinical and demographic characteristics of patients with multimorbidity, defined as  $\geq 3$  of 12 Long Term Conditions (LTCs) selected according to high predicted healthcare utilisation. Multilevel logistic regression was used to model the social determinants and risk factors for multimorbidity. Alluvial plots were constructed to illustrate differing multimorbidity acquisition sequences according to age, ethnicity and social deprivation.

**Results.** The commonest LTCs were diabetes (63.0%) and chronic pain (42.8%). Social deprivation and ethnicity were independent determinants of multimorbidity: for most compared to least

1  
2  
3 deprived quintile, Adjusted Odds Ratio (AOR) 1.56 (95%CI, 1.41, 1.72); for South Asian compared to  
4 white ethnicity, AOR 1.44 (95%CI, 1.29, 1.61); for black compared to white ethnicity, AOR 0.86  
5 (95%CI, 0.80, 0.92). The three included risk factors were relatively strong determinants of  
6 multimorbidity: hypertension, AOR 5.05 (95%CI, 4.69, 5.44); moderate obesity, AOR 3.41 (95%CI,  
7 3.21, 3.63); smoking, AOR 2.30 (95%CI, 2.16, 2.45). The most common initial onset conditions were  
8 diabetes and depression; diabetes particularly in older and black ethnic groups; depression  
9 particularly in younger, more deprived and white ethnicity groups. Chronic pain was less common as  
10 an initial condition.  
11  
12

13 **Conclusions** Our findings confirm the importance of age, social deprivation and ethnicity as  
14 determinants of multimorbidity. However, the risk factors of smoking, obesity and hypertension  
15 were stronger determinants of multimorbidity than deprivation or ethnicity. The acquisition  
16 sequence of multimorbidity is patterned by demographic determinants. Understanding the onset  
17 conditions of multimorbidity and risk factors may lead to the development of interventions to slow  
18 the progression of multimorbidity.  
19  
20  
21  
22  
23  
24  
25  
26  
27  
28  
29

### 30 **Strengths and limitations**

- 31 • This study defines multimorbidity based on the inclusion of Long Term Conditions (LTCs)  
32 with high predicted healthcare utilisation rates
- 33 • Multimorbidity is studied in a deprived, multi-ethnic community
- 34 • Few studies of multimorbidity have analysed longitudinal data; this study uses longitudinal  
35 data to identify the acquisition sequence of multimorbidity and how this is influenced by  
36 demographic determinants
- 37 • Difficulties gaining access to anonymised primary care data limited the sample size
- 38 • Coding validation and completeness restricted the analysis of available primary care data
- 39
- 40
- 41
- 42
- 43
- 44
- 45
- 46
- 47
- 48
- 49
- 50
- 51
- 52
- 53
- 54
- 55
- 56
- 57
- 58
- 59
- 60

## BACKGROUND

Healthcare utilisation is increasingly driven by multimorbidity (1). Each long-term condition (LTC) included within a definition of multimorbidity is likely to generate multiple primary care consultations with general practitioners (GPs), practice nurses and other health care professionals, and may result in Accident and Emergency (A&E) attendances, referral to out-patient appointments and hospital admissions.

Estimates of healthcare utilisation attributable to multimorbidity vary according to the LTCs included within a definition of multimorbidity. There is no standard definition of multimorbidity. One systematic review noted that the number of included LTCs ranged from five to 185 with estimates of population prevalence ranging from 13.1% to 71.8% depending on the number of included conditions (2). In one recent UK study in which multimorbidity was defined as two or more of a selection of 36 LTCs, 27.2% of the population had multimorbidity, accounting for 52.9% of GP consultations and generating a median of nine annual GP consultations (3). LTCs also contribute to the development of frailty, itself a driver of healthcare utilisation (4).

In response to high demand for health and social care, many healthcare providers and commissioners have sought to identify those patients with greatest needs through a process termed 'risk stratification'. Several electronic tools have been developed to offer population based risk stratification (5). An alternative approach is the use of expert panels to define high-demand patient groups (6). Having identified the cohort of patients with the greatest requirement for health and social care services, the purpose of this process is to guide resource allocation on a needs basis, often with the implicit assumption that additional investment in a primary care setting may reduce demand for more expensive secondary care services. Although funding and healthcare need should align, there is little evidence that investment in additional community resources for those most at risk of hospital attendance results in overall reductions in secondary care utilisation (7).

1  
2  
3 Following a consultation exercise and report from an expert panel, two inner London boroughs and  
4 their commissioning groups made the decision to define multimorbidity based on predicted high  
5 healthcare and social care demand. Multimorbidity in this context consisted of three or more LTCs  
6 considered most likely to result in functional impairment and high service demand. This 'high service  
7 demand' definition was used to identify a cohort to receive a package of integrated care, termed  
8 'care coordination'.  
9

10 We aimed to study the characteristics of this multimorbidity cohort, defining both the demographic  
11 determinants and risk factors associated with multimorbidity acquisition. Then to determine the  
12 acquisition sequence of multimorbidity and the influence of demographic factors on this sequence.  
13  
14  
15  
16

## 17 **METHODS**

### 18 **Study setting**

19 Our study was set in Lambeth, one of the two inner London boroughs adopting the 'care  
20 coordination' definition of multimorbidity (8). The population sample consisted of all patients  
21 registered at all general practices in Lambeth, with the exception of patients who had opted out of  
22 anonymised data sharing for research purposes.  
23  
24  
25  
26

### 27 **Study design**

28 We conducted a cross-sectional analysis and longitudinal study based on anonymised coded primary  
29 care data extracted from electronic health records (EHR) held in primary care.  
30  
31  
32

### 33 **Study population**

34 We included data on all patients aged 18 years and over registered with a general practice. For the  
35 population with multimorbidity, we included all those with LTCs recorded in the EHR and included in  
36 the 'care coordination' definition of multimorbidity: Atrial Fibrillation (AF), Chronic Obstructive  
37  
38  
39  
40  
41  
42  
43  
44  
45  
46  
47  
48  
49  
50  
51  
52  
53  
54  
55  
56  
57  
58  
59  
60

1  
2  
3 Pulmonary Disease (COPD), Chronic Pain (CP), Chronic Kidney Disease (CKD), Coronary Heart Disease  
4 (CHD), Diabetes (DM), Dementia, Depression, Heart Failure (HF), Serious Mental Illness, Stroke,  
5  
6 Morbid Obesity. The definition and specified codes for each condition was that used by the Quality  
7  
8 and Outcomes Framework (QOF), based on 'QOF38' definitions (9). Two of the selected conditions  
9  
10 were not included within the QOF: chronic pain, defined on the basis of two or more repeat  
11  
12 prescriptions for opioid analgesics (British National Formulary, chapter 4.7.2) or neuropathic pain  
13  
14 medication (British National Formulary, chapter 4.7.3) (10); morbid obesity defined as a Body Mass  
15  
16 Index  $\geq 40$  kg/m<sup>2</sup>.  
17  
18  
19  
20

21  
22 Demographic data consisted of gender, age in years and self-ascribed ethnicity obtained from the  
23  
24 EHR. Social deprivation data derived from residency data was based on the Index of Multiple  
25  
26 Deprivation 2010 classification at Lower Super Output Area (LSOA), stratified into locally based  
27  
28 quintiles (11). Local deprivation quintiles were used in place of national quintiles since mean  
29  
30 deprivation levels are high in Lambeth, the 22<sup>nd</sup> most deprived local authority (out of 326) in England  
31  
32 (12).  
33  
34  
35

36 Risk factors included in the analysis were: hypertension (defined as patients on the QOF  
37  
38 Hypertension register); moderate obesity (defined as a Body Mass Index of 30.0-39.9; note that  
39  
40 patients with BMI  $\geq 40$  were included as one of the LTCs within the definition of multimorbidity and  
41  
42 therefore not included as a risk factor); smoking (patients with any record of being a smoker).  
43  
44  
45

#### 46 **Data variables**

47  
48 The data consisted of 'real world', routinely collected, anonymised, patient-level Read, EMIS and  
49  
50 SNOMED coded information. Data were extracted from the EHR into a secure data warehouse on a  
51  
52 quarterly basis and contained information on patient demographic characteristics, LTCs, clinical  
53  
54 values and medication. The data used in this study were extracted in May 2018.  
55  
56  
57

#### 58 **Data analysis**

1  
2  
3 We analysed demographic, social and risk factor data for the multimorbidity cohort and general  
4 population using univariable statistical methods applied at patient-level. Demographic and risk  
5 factor determinants of multimorbidity were analysed using mixed effects multilevel logistic  
6 regression models, with data analysed at patient level and general practice level, based on the  
7 registered general practice of each patient in the study sample. We also conducted a sensitivity  
8 analysis using mixed effects logistic regression models to allow for random effects, adjusted for  
9 clustering at the practice level. The sensitivity analysis allowed pseudo-r<sup>2</sup> values and Receiver  
10 Operating Characteristic (ROC) curves to be derived. Analysis was conducted using the statistical  
11 software package STATA IC 15.  
12  
13  
14  
15  
16  
17  
18  
19  
20  
21  
22

23  
24 The acquisition sequence for patients in the multimorbidity cohort was established by searching the  
25 EHR for date of onset of each LTC. For this analysis, we established the order of acquisition and  
26 tabulated the frequency of first, second and third LTCs. We displayed findings using alluvial plots, an  
27 infographic allowing representation of multiple pathways. These were constructed using the  
28 software R, and the packages 'ggplot2' and 'ggalluvial' (14).  
29  
30  
31  
32  
33  
34  
35

### 36 **Patient and public involvement**

37  
38 The borough based and statutory organisation, Lambeth HealthWatch, represented the interests of  
39 patients and public in this work; they contributed to the original protocol design and shared in  
40 dissemination of the findings.  
41  
42  
43  
44  
45  
46  
47  
48

## 49 **RESULTS**

### 50 **Multimorbidity cohort characteristics**

51  
52 The final study population consisted of 332,353 patients aged ≥18 years. Data from 13,369 (4.0%)  
53 patients had been excluded because a data sharing opt-out code was recorded in their EHR. Patients  
54 were included in the final sample even though some demographic data were missing: 3289 (0.99%)  
55  
56  
57  
58  
59  
60



patients could not be linked to a LSOA and therefore had missing IMD-2015 score data; ≤10 patients had missing coded gender data.

In all, 5597 (1.7%) patients had a record of three or more of the selected LTCs, the 'multimorbidity cohort'. Most (n = 3542) of this cohort had three LTCs (63.3%); 1333 (23.8%) had four LTCs; 492 (8.8%) had 5 LTCs; the remaining 230 (4.1%) had more than 5 LTCs.

A summary of LTC frequencies within the multimorbidity cohort is displayed in Table 1. The most common LTCs within this cohort were: DM (63.0%) and chronic pain (42.8%). In contrast, the most common of the included LTCs in the adult general population were: depression (8.4%), DM (5.4%) and morbid obesity (3.2%).

**Table 1.** Frequencies of Long Term Conditions included in the multimorbidity cohort (n = 5597 patients) compared with the remainder of the registered population and with the general population aged ≥18 years.

| Long Term Condition | Multimorbidity cohort: frequency (valid %) N = 5597 | Non-Multimorbidity cohort: frequency (valid %) N = 326,756 | Population values: frequency (valid %) N = 332,353 |
|---------------------|-----------------------------------------------------|------------------------------------------------------------|----------------------------------------------------|
| DM                  | 3525 (63.0%)                                        | 14,405 (4.4%)                                              | 17,930 (5.4%)                                      |
| Chronic Pain        | 2397 (42.8%)                                        | 5813 (1.8%)                                                | 8210 (2.5%)                                        |
| CKD                 | 2101 (37.5%)                                        | 3470 (1.1%)                                                | 5571 (1.7%)                                        |
| CHD                 | 2099 (37.5%)                                        | 2668 (0.8%)                                                | 4767 (1.4%)                                        |
| Depression          | 2086 (37.3%)                                        | 25,877 (7.9%)                                              | 27,963 (8.4%)                                      |
| Morbid Obesity      | 1653 (29.5%)                                        | 8883 (2.7%)                                                | 10,486 (3.2%)                                      |
| AF                  | 1254 (22.4%)                                        | 1493 (0.5%)                                                | 2747 (0.8%)                                        |
| COPD                | 1247 (22.3%)                                        | 2387 (0.7%)                                                | 3634 (1.1%)                                        |
| Heart Failure       | 1186 (21.2%)                                        | 544 (0.2%)                                                 | 1730 (0.5%)                                        |
| Stroke              | 1095 (19.6%)                                        | 1571 (0.5%)                                                | 2666 (0.8%)                                        |
| SMI                 | 692 (12.4%)                                         | 4099 (1.3%)                                                | 4791 (1.4%)                                        |
| Dementia            | 616 (11.0%)                                         | 738 (0.2%)                                                 | 1354 (0.4%)                                        |

The demographic characteristics of the multimorbidity cohort are displayed in Table 2. Within the cohort, 33.9% were aged under 65 years (compared with 91.7% in the sample population); 27.7% were of a 'Black' ethnicity (18.0% in the sample population) and 46.0% were born in the UK (45.2% in the sample population). The mean age for multimorbid patients in least and most deprived quintiles was 73.0 and 69.3 years, respectively; and for the white, black and south Asian populations was 71.2, 69.4 and 71.9 years, respectively.

**Table 2.** Demographic characteristics of multimorbidity cohort, compared with remainder of registered population aged  $\geq 18$  years.

| Demographic characteristic                                       | Multimorbidity cohort:<br>frequency (valid %)<br>N = 5597 | Non-Multimorbidity cohort:<br>frequency (valid %)<br>N = 326,756 |
|------------------------------------------------------------------|-----------------------------------------------------------|------------------------------------------------------------------|
| Female gender                                                    | 3042 (54.4%)                                              | 161,445 (49.4%)                                                  |
| Age <65 years                                                    | 1899 (33.9%)                                              | 299,742 (91.7%)                                                  |
| Age $\geq 65$ -74 years                                          | 1249 (22.3%)                                              | 15,992 (4.9%)                                                    |
| Age $\geq 75$ -84 years                                          | 1479 (26.4%)                                              | 8038 (2.5%)                                                      |
| Age $\geq 85$ years                                              | 970 (17.3%)                                               | 2884 (0.9%)                                                      |
| White                                                            | 3022 (54.0%)                                              | 179,859 (55.0%)                                                  |
| Black                                                            | 1553 (27.7%)                                              | 58,939 (18.0%)                                                   |
| South Asian                                                      | 469 (8.4%)                                                | 22,323 (6.8%)                                                    |
| Mixed                                                            | 197 (3.5%)                                                | 15,177 (4.6%)                                                    |
| Other                                                            | 100 (1.8%)                                                | 9804 (3.0%)                                                      |
| Unknown                                                          | 256 (4.6%)                                                | 40,654 (12.4%)                                                   |
| Country of origin: UK*                                           | 1413 (46.0%)                                              | 69,675 (45.2%)                                                   |
| Language preference:<br>English*                                 | 3755 (84.0%)                                              | 240,287 (73.8%)                                                  |
| Social deprivation:<br>1 <sup>st</sup> quintile (most deprived)* | 1500 (26.8%)                                              | 63,374 (19.4%)                                                   |
| Social deprivation:<br>2 <sup>nd</sup> quintile*                 | 1232 (22.0%)                                              | 63,073 (19.3%)                                                   |
| Social deprivation:<br>3 <sup>rd</sup> quintile*                 | 995 (17.8%)                                               | 66,409 (20.3%)                                                   |

|                                                                   |              |                |
|-------------------------------------------------------------------|--------------|----------------|
| Social deprivation:<br>4 <sup>th</sup> quintile*                  | 1013 (18.1%) | 66,334 (20.3%) |
| Social deprivation:<br>5 <sup>th</sup> quintile (least deprived)* | 828 (14.8%)  | 64,306 (19.7%) |

\*missing data with reduction in denominator number

### Multimorbidity cohort demographic determinants

Demographic determinants of the multimorbidity cluster are displayed in Table 3. Based on the adjusted odds ratio (AOR) derived from the multilevel regression model, the strongest determinant for multimorbidity was related to age. After adjustment for age, both social deprivation (the more deprived quintiles) and ethnicity (Black and south Asian ethnicities) remained significant determinants, albeit with much smaller odds ratios. The AOR for black and South Asian compared with white ethnicity was 1.15 (95% CIs, 1.07, 1.23) and 1.19 (95% CIs, 1.07, 1.33), respectively; for most compared to least deprived quintile, the AOR was 1.83 (95% CIs, 1.66, 2.02).

**Table 3.** Demographic determinants of the multimorbidity cohort: adjusted odds ratios derived from mixed effects multi-level logistic regression modelling.

| Demographic characteristic                                      | Adjusted odds ratio (AOR) | 95% confidence intervals for AOR |
|-----------------------------------------------------------------|---------------------------|----------------------------------|
| Female gender                                                   | 1.05                      | 0.99, 1.11                       |
| Age <65 years                                                   | (reference group)         |                                  |
| Age ≥65-74 years                                                | 11.81                     | 10.96, 12.72                     |
| Age ≥75-84 years                                                | 27.14                     | 25.22, 29.20                     |
| Age ≥85 years                                                   | 48.70                     | 44.60, 53.18                     |
| White                                                           | (reference group)         |                                  |
| Black                                                           | 1.15                      | 1.07, 1.23                       |
| South Asian                                                     | 1.19                      | 1.07, 1.33                       |
| Mixed                                                           | 0.96                      | 0.83, 1.12                       |
| Other                                                           | 0.76                      | 0.62, 0.93                       |
| Unknown                                                         | 0.44                      | 0.38, 0.50                       |
| Social deprivation:<br>1 <sup>st</sup> quintile (most deprived) | 1.83                      | 1.66, 2.02                       |

|                                                                  |                   |            |
|------------------------------------------------------------------|-------------------|------------|
| Social deprivation:<br>2 <sup>nd</sup> quintile                  | 1.58              | 1.43, 1.75 |
| Social deprivation:<br>3 <sup>rd</sup> quintile                  | 1.27              | 1.15, 1.40 |
| Social deprivation:<br>4 <sup>th</sup> quintile                  | 1.21              | 1.10, 1.33 |
| Social deprivation:<br>5 <sup>th</sup> quintile (least deprived) | (reference group) |            |

### Multimorbidity cohort risk factor determinants

Addition of the three risk factors included in the study attenuated the odds ratios for multimorbidity related to age (Table 4). Social deprivation remained a determinant of multimorbidity: for most compared to least deprived quintile, the AOR was 1.56 (95% CIs, 1.41, 1.72). South Asian ethnicity remained a significant determinant of multimorbidity: AOR 1.44 (95% CIs, 1.29, 1.61) but black ethnicity was no longer a positive determinant: AOR 0.86 (95% CIs, 0.80, 0.92).

The three risk factors were significant determinants of multimorbidity: hypertension, AOR 5.05 (95% CIs, 4.69, 5.44); moderate obesity, AOR 3.41 (95% CIs, 3.21, 3.63); smoking, AOR 2.30 (95% CIs, 2.16, 2.45).

**Table 4.** Demographic determinants of the multimorbidity cohort: odds ratios derived from mixed effects multi-level logistic regression modelling with addition of three risk factors: Hypertension, Obesity (moderate), Smoking (ever).

| Demographic characteristic | Adjusted odds ratio (AOR) | 95% confidence intervals for AOR |
|----------------------------|---------------------------|----------------------------------|
| Female gender              | 1.10                      | 1.01, 1.19                       |
| Age <65 years              | (reference group)         |                                  |
| Age ≥65-74 years           | 4.01                      | 3.69, 4.36                       |
| Age ≥75-84 years           | 8.12                      | 7.46, 8.83                       |
| Age ≥85 years              | 15.71                     | 14.20, 17.38                     |
| White                      | (reference group)         |                                  |
| Black                      | 0.86                      | 0.80, 0.92                       |
| South Asian                | 1.44                      | 1.29, 1.61                       |

|                                                                  |                   |            |
|------------------------------------------------------------------|-------------------|------------|
| Mixed                                                            | 0.95              | 0.81, 1.11 |
| Other                                                            | 0.83              | 0.67, 1.03 |
| Unknown                                                          | 0.60              | 0.52, 0.69 |
| Social deprivation:<br>1 <sup>st</sup> quintile (most deprived)  | 1.56              | 1.41, 1.72 |
| Social deprivation:<br>2 <sup>nd</sup> quintile                  | 1.35              | 1.22, 1.50 |
| Social deprivation:<br>3 <sup>rd</sup> quintile                  | 1.18              | 1.06, 1.31 |
| Social deprivation:<br>4 <sup>th</sup> quintile                  | 1.18              | 1.06, 1.30 |
| Social deprivation:<br>5 <sup>th</sup> quintile (least deprived) | (reference group) |            |
| Hypertension register                                            | 5.05              | 4.69, 5.44 |
| Moderate obesity                                                 | 3.41              | 3.21, 3.63 |
| Smoker (ever)                                                    | 2.30              | 2.16, 2.45 |

### Sensitivity analyses

Re-analysis of the determinants of multimorbidity using regression modelling adjusted for clustering at practice level resulted in similar adjusted odds ratios to those obtained in the primary analyses (Table 5). We explored goodness-of-fit through derived pseudo- $r^2$  values for demographic determinants: pseudo- $r^2 = 0.22$ , and for risk factor adjusted determinants (hypertension, moderate obesity, smoking): pseudo- $r^2 = 0.32$ . The areas under the ROC curve for each model were 0.84 and 0.93, respectively (Supplementary file: Figures 1a, 1b).

**Table 5.** Demographic determinants of the multimorbidity cohort: odds ratios derived from mixed effects logistic regression modelling adjusted for clustering at practice level.

| Demographic characteristic | Adjusted odds ratio (AOR) | 95% confidence intervals for AOR |
|----------------------------|---------------------------|----------------------------------|
| Female gender              | 1.05                      | 0.97, 1.13                       |
| Age <65 years              | (reference group)         |                                  |
| Age ≥65-74 years           | 12.08                     | 10.53, 13.86                     |
| Age ≥75-84 years           | 27.74                     | 24.28, 31.71                     |

|                                                                  |                   |              |
|------------------------------------------------------------------|-------------------|--------------|
| Age ≥85 years                                                    | 49.84             | 43.00, 57.78 |
| White                                                            | (reference group) |              |
| Black                                                            | 1.19              | 1.06, 1.33   |
| South Asian                                                      | 1.16              | 1.00, 1.34   |
| Mixed                                                            | 0.98              | 0.81, 1.20   |
| Other                                                            | 0.77              | 0.62, 0.96   |
| Unknown                                                          | 0.44              | 0.36, 0.55   |
| Social deprivation:<br>1 <sup>st</sup> quintile (most deprived)  | 1.96              | 1.69, 2.26   |
| Social deprivation:<br>2 <sup>nd</sup> quintile                  | 1.66              | 1.43, 1.92   |
| Social deprivation:<br>3 <sup>rd</sup> quintile                  | 1.31              | 1.13, 1.51   |
| Social deprivation:<br>4 <sup>th</sup> quintile                  | 1.24              | 1.09, 1.42   |
| Social deprivation:<br>5 <sup>th</sup> quintile (least deprived) | (reference group) |              |

### Multimorbidity acquisition sequence

Of the 5597 patients in the multimorbidity cohort, 5196 had three distinct dates of onset for each of their three or more component LTCs. The remaining 401 (7.2%) patients had identical dates of onset recorded for two or three of their first three LTCs and therefore could not be classified into a sequence. Alluvial plots were constructed displaying the acquisition sequence for all patients (Figure 1a) and edited to display dominant flows of patients in each category. Figure 1b displays the three most common starting conditions and subsequent most commonly acquired second and third LTCs.

The alluvial plots illustrate that diabetes and depression were the most common starting conditions for patients with multimorbidity; diabetes was also relatively common as the second or third acquired LTC whereas depression was predominantly a first-onset LTC (Figure 1b).

1  
2  
3 In the most deprived quintile, diabetes and depression were the most common starting conditions  
4  
5 whereas in the least deprived quintile, diabetes and CHD were more common as starting conditions  
6  
7 than depression (Figures 2b and 3b).  
8  
9

10 Multimorbidity in the white ethnic group was dominated by depression as the starting condition,  
11  
12 whereas in the black ethnic group diabetes was the most common starting condition, with  
13  
14 depression and SMI also relatively common (Figures 4b and 5b).  
15  
16

17  
18 Multimorbidity in the under 65 year old cohort was dominated by depression as the starting  
19  
20 condition, with SMI also relatively common; in the  $\geq 65$  year old cohort, diabetes and CHD were the  
21  
22 most common starting conditions.  
23  
24

25 Chronic pain appeared to be more common as a second or third acquired LTC but less common as a  
26  
27 first LTC. This sequence was apparent in the overall picture, in the pattern displayed by least and  
28  
29 most deprived quintiles, for black and white ethnicities and for younger and older age cohorts.  
30  
31

32 Morbid obesity was among the more common starting conditions in the most deprived cohort and  
33  
34 younger age cohort. However, in other demographic samples, morbid obesity was more common as  
35  
36 a second and third acquired LTC.  
37  
38  
39  
40  
41  
42

## 43 **DISCUSSION**

44  
45 We report on multimorbidity using a definition originating from a health service commissioning  
46  
47 perspective, consisting of three or more of 12 LTCs selected because of likely high impact upon  
48  
49 health service and social care utilisation. In total, 1.7% of the adult population in our study sample  
50  
51 had multimorbidity according to these narrowly defined criteria. Diabetes and chronic pain were the  
52  
53 most prevalent LTCs within this cohort. Independent of age, both ethnicity and social deprivation  
54  
55 were significant determinants of multimorbidity. However, the risk factors of hypertension, obesity  
56  
57 and smoking were more strongly associated with multimorbidity than social deprivation or ethnicity.  
58  
59  
60

1  
2  
3 The acquisition sequence of multimorbidity differed substantially according to age, ethnicity and  
4 social deprivation. Diabetes and depression were the most common starting conditions overall.  
5  
6  
7 Diabetes as a starting condition was notably more common in the older and black ethnic group.  
8  
9  
10 Depression as a starting condition was notably more common in patients who were younger, more  
11  
12 deprived and in the white ethnic group. Differences in acquisition sequence between most and least  
13  
14 deprived areas and white and black ethnicities (Figures 3-5) are unlikely to have been strongly  
15  
16 influenced by age differences since mean age was similar for each of these cohorts.  
17  
18

### 19 **Strengths and Limitations**

20  
21  
22 Data access was a limitation to this analysis. We were only able to obtain data from one of the two  
23  
24 boroughs adopting this approach to multimorbidity, the other lacked a data extraction system  
25  
26 preventing us from analysing large datasets of patient-level data. Had we gained access to the data,  
27  
28 this would have approximately doubled our sample size and enabled further analysis of  
29  
30 multimorbidity in deprived, multi-ethnic populations. This difficulty in accessing anonymised data  
31  
32 hampers the analysis of patient-level data in many areas of the UK (15). Data coding constrains the  
33  
34 analysis of primary care data and we were only able to study the association of multimorbidity with  
35  
36 a limited range of risk factors while other known risk factors such as exercise and diet could not be  
37  
38 captured. We aimed to display the acquisition sequence of LTCs using alluvial plots. However, these  
39  
40 plots do not readily display time data resulting in a lack of clarity in the rate of progression of  
41  
42 multimorbidity. A time-to-event analysis is required for identifying those patients who progress  
43  
44 rapidly from first LTC into multimorbidity, which is the subject of further study. Similarly, the  
45  
46 acquisition sequence could not be determined for a small minority of patients with identical LTC  
47  
48 date-of-onset recording by GPs whereas in reality, it is unlikely that the LTC onset dates were  
49  
50 simultaneous. Furthermore, as with all studies based on primary care data, there may be coding  
51  
52 anomalies which introduce bias into the estimates of LTC prevalence. QOF coding criteria were used  
53  
54 for 10 of the included LTCs, standardising the definition. However, the prevalence of conditions such  
55  
56  
57  
58  
59  
60



1  
2  
3 as depression may be underestimated using QOF criteria (16). For the two LTCs not included in the  
4 QOF, the definition is dependent on GP coding. Thus 'morbid obesity' was only included in our study  
5  
6 if there was a BMI recording which may have resulted in an under-estimate of prevalence. 'Chronic  
7  
8 pain' was defined based on medication consumption whereas many patients with chronic pain may  
9  
10 have sought alternatives to analgesic medication resulting in an underestimate of prevalence;  
11  
12 conversely, our inclusion criteria of 'two or more prescriptions over the preceding year' may have  
13  
14 resulted in an overestimate of prevalence, with some patients recovering from chronic pain during  
15  
16 the course of the year. Finally, the richness of locally based data covering a whole borough with  
17  
18 unique demographic characteristics has to be offset against possible loss of generalisability to other  
19  
20 areas with very different social deprivation and ethnicity characteristics.  
21  
22  
23  
24  
25

### 26 **Comparison with the literature**

27  
28  
29 Our cross-sectional data, although conducted in a deprived, multi-ethnic population, are similar to  
30  
31 the findings of others reporting on increased multimorbidity prevalence associated with age, social  
32  
33 deprivation and ethnic minority status (17). Comparison with other multimorbidity studies is difficult  
34  
35 because of the highly restricted definition of multimorbidity used in the current study. Nevertheless,  
36  
37 other studies have reported the high prevalence of both diabetes and depression in multimorbidity  
38  
39 cohorts (3, 17). A higher prevalence of mental health and physical health LTC combinations has been  
40  
41 noted in deprived areas, although in our own study we did not conduct an analysis to identify  
42  
43 specific LTC combinations (18). Certain conditions have been found to be more prevalent in deprived  
44  
45 communities, also contributing to higher prevalence of multimorbidity in these areas, such as  
46  
47 depression and addiction issues in younger deprived populations (19), or more generally,  
48  
49 depression, drugs, anxiety, dyspepsia, chronic pain, CHD, DM (20). These findings are aligned to our  
50  
51 own reporting of high proportions of multimorbid patients in deprived areas with depression and  
52  
53 diabetes. However, the inner city population in our study is characterised by a much younger overall  
54  
55 age profile compared with the national population: 8% of the population of Lambeth is aged 65  
56  
57  
58  
59  
60

1  
2  
3 years or more compared to a mean of 18% in England (21). Added to this, the most socially deprived  
4  
5 and black ethnic minority groups in our sample were somewhat younger. Both factors are likely to  
6  
7 have reduced the overall study prevalence of conditions associated with ageing such as diabetes and  
8  
9 CHD. Many multimorbidity studies do not include morbid obesity within their definition (3, 17); we  
10  
11 found morbid obesity was particularly associated with social deprivation.  
12  
13

14  
15 Several publications have reported on combinations and clusters of LTCs but few longitudinal  
16  
17 analyses have been reported (22). One study from Australia reported the order of appearance for  
18  
19 eight LTCs, reporting in detail for asthma and mood related disorders, the two LTCs most strongly  
20  
21 associated with the risk of developing a second LTC. For those with baseline asthma, there was a  
22  
23 higher subsequent risk of developing COPD and hypercholesterolaemia; for those with baseline  
24  
25 mood disorders, there risk of subsequent asthma, diabetes and other mental disorders was  
26  
27 increased (23). In a study of cardiometabolic conditions in Australia, nearly one-quarter of women  
28  
29 initially diagnosed with stroke subsequently progressed to other conditions which was a much larger  
30  
31 proportion progressing to other conditions than in those initially diagnosed with diabetes (9.9%) or  
32  
33 heart disease (11.4%) (24). A further US study explored the acquisition sequence of 20 LTCs  
34  
35 describing dyads and triads of conditions and reporting, for example, that the most common triad  
36  
37 sequence in 20-39 year olds was depression, asthma and substance misuse whereas in 50-59 year  
38  
39 olds it was hyperlipidaemia, hypertension and diabetes (25). They concluded that combinations of  
40  
41 LTCs vary extensively by age and sex. Our own findings confirm variation by age and sex, with  
42  
43 ethnicity adding to the pattern of variation. Some authors have suggested that the study of  
44  
45 acquisition sequence may suggest potential interventions to prevent, minimise or delay progression  
46  
47 toward multimorbidity (23). Our findings that three risk factors are more strongly associated with  
48  
49 multimorbidity than deprivation and ethnicity, suggest that interventions to reduce the impact of  
50  
51 these risk factors may contribute to a reduction in the prevalence of multimorbidity.  
52  
53  
54  
55  
56  
57  
58  
59  
60

**CONCLUSION**

We have confirmed the role of age, social deprivation and ethnicity as determinants of multimorbidity in an inner city multi-ethnic population and have extended previous findings demonstrating the way in which the acquisition sequence of multimorbidity is patterned by these determinants. Three risk factors, hypertension, obesity and smoking were stronger determinants of multimorbidity than either deprivation or ethnicity. The strength of these risk factors as determinants suggests interventions which may be effective in reducing the prevalence, delaying the onset or slowing the progression of multimorbidity.

### What is already known on this topic

- Multimorbidity is known to be associated with social deprivation and ethnicity
- Exposure to cardiovascular risk factors is known to increase the prevalence of multimorbidity

### What this study adds

- Ethnicity has differing associations with multimorbidity. After adjustment for risk factors, South Asian ethnicity was positively associated with the prevalence of multimorbidity whereas black ethnicity was negatively associated.
- The most common initial onset multimorbidity conditions are diabetes and depression
- The acquisition sequence of multimorbidity is patterned by age, ethnicity, social deprivation and gender
- Three risk factors, hypertension, obesity and smoking, are stronger determinants of multimorbidity than deprivation and ethnicity.
- Understanding the risk factors and acquisition sequence of multimorbidity may lead to the development of interventions to reduce the prevalence, delay the onset or slow the progression of multimorbidity.

**Contributors:** MA, HD and MW contributed to the idea and design of the study. SD, DW and JC led on data extraction and preparation. Statistical analysis was conducted by MA and HD. MA produced the first draft of the paper; all co-authors contributed and approved the final draft. MA is the guarantor. The corresponding author attests that all listed authors meet authorship criteria and that no others meeting the criteria have been omitted.

**Funding:** This work was supported by the Guy's and St Thomas' Charity with a grant awarded November 2017. The views expressed are those of the authors and not necessarily those of the

1  
2  
3 funders. The findings presented are independent from the funders who have had no role in data  
4 collection, data analysis or writing of the paper.  
5  
6

7 **Competing interests:** All authors have completed the ICMJE uniform disclosure form at  
8 [www.icmje.org/coi\\_disclosure.pdf](http://www.icmje.org/coi_disclosure.pdf) and declare: no support from any organisation for the submitted  
9 work; no financial relationships with any organisations that might have an interest in the submitted  
10 work in the previous three years; no other relationships or activities that could appear to have  
11 influenced the submitted work.  
12  
13  
14  
15  
16  
17

### 18 **Ethical approval**

19 All data were extracted under the terms of a signed Data Sharing Agreement (DSA) with each  
20 practice and with project-specific approval following submission of a Data Privacy Impact  
21 Assessment (DPIA), approved by Lambeth Clinical Commissioning Group (CCG) on 2/11/17.  
22 Information Governance approval required 'low number suppression', ensuring that data could not  
23 be displayed if the patient number was 10 or less in any given category; in these circumstances, data  
24 reporting would state: '≤10 patients'. Separate Ethical Committee approval was not required (Health  
25 Research Authority, personal correspondence, 29/9/17) since all data were fully anonymised for the  
26 purposes of research access, and all Patient Identifiable Data (PID) had been removed.  
27  
28  
29  
30  
31  
32  
33  
34  
35  
36  
37  
38  
39

40 **Data sharing:** No additional data available.  
41  
42  
43  
44  
45  
46  
47  
48  
49  
50  
51  
52  
53  
54  
55  
56  
57  
58  
59  
60

## REFERENCES:

1. Palladino R, Tayu Lee J, Ashworth M, *et al.* Associations between multimorbidity, healthcare utilisation and health status: evidence from 16 European countries. *Age Ageing* 2016;45:431-5. <https://dx.doi.org/10.11606%2FS1518-8787.2018052000639>
2. Fortin M, Stewart M, Poitras ME, *et al.* A systematic review of prevalence studies on multimorbidity: toward a more uniform methodology. *Ann Fam Med* 2012;10:142-51. <https://doi.org/10.1370/afm.1337>
3. Cassell A, Edwards D, Harshfield A, *et al.* The epidemiology of multimorbidity in primary care: a retrospective cohort study. *Br J Gen Pract* 2018;68:e245-e51. <https://doi.org/10.3399/bjgp18X695465>
4. Hanlon P, Nicholl BI, Jani BD, *et al.* Frailty and pre-frailty in middle-aged and older adults and its association with multimorbidity and mortality: a prospective analysis of 493 737 UK Biobank participants. *Lancet Public Health* 2018;3:e323-e32. [https://doi.org/10.1016/S2468-2667\(18\)30091-4](https://doi.org/10.1016/S2468-2667(18)30091-4)
5. Billings J, Blunt I, Steventon A, *et al.* Development of a predictive model to identify inpatients at risk of re-admission within 30 days of discharge (PARR-30). *BMJ Open* 2012;2. <http://dx.doi.org/10.1136/bmjopen-2012-001667>
6. Huntley AL, Johnson R, Purdy S, *et al.* Measures of multimorbidity and morbidity burden for use in primary care and community settings: a systematic review and guide. *Ann Fam Med*. 2012;10:134-41. <https://doi.org/10.1370/afm.1363>
7. Roland M, Abel G. Reducing emergency admissions: are we on the right track? *Br Med J* 2012;345:e6017. <https://doi.org/10.1136/bmj.e6017>
8. From one to many. Exploring people's progression to multiple long-term conditions in an urban environment. Guy's and St Thomas' Charity. London, 2018. [https://www.gsttcharity.org.uk/sites/default/files/GSTTC\\_MLTC\\_Report\\_2018.pdf](https://www.gsttcharity.org.uk/sites/default/files/GSTTC_MLTC_Report_2018.pdf).
9. Quality and Outcomes Framework (QOF) business rules v 38 2017-2018 October code release.NHS Digital. Leeds, 2018. <https://digital.nhs.uk/data-and-information/data-collections-and-data-sets/data-collections/quality-and-outcomes-framework-qof/quality-and-outcome-framework-qof-business-rules/quality-and-outcomes-framework-qof-business-rules-v-38-2017-2018-october-code-release>.
10. Joint Formulary Committee: British National Formulary (online). London: BMJ Group and Pharmaceutical Press,<http://www.medicinescomplete.com>
11. English Indices of Deprivation 2015 - LSOA Level. Ministry of Housing, Communities and Local Government. London, 2018. <https://data.gov.uk/dataset/8f601edb-6974-417e-9c9d-85832dd2bbf2/english-indices-of-deprivation-2015-lsoa-level>
12. Lambeth, State of the borough, 2016. Lambeth Council. London, 2017. <https://www.lambeth.gov.uk/sites/default/files/State%20of%20Borough%202016%20-%20v3.pdf>
13. Statacorp. Stata Statistical Software: Release 14 2015. Available from: <http://www.stata.com/>
14. Alluvial Diagrams in ggplot2. Brunson, JC, 2018. <https://cran.r-project.org/web/packages/ggalluvial/vignettes/ggalluvial.html>
15. Harwich E, Lasko-Skinner R. Making NHS data work for everyone. Reform. London, 2018. [https://reform.uk/sites/default/files/2018-12/Making%20NHS%20data%20work%20for%20everyone%20WEB\\_1.pdf](https://reform.uk/sites/default/files/2018-12/Making%20NHS%20data%20work%20for%20everyone%20WEB_1.pdf)
16. Kendrick T, Stuart B, Newell C, *et al.* Changes in rates of recorded depression in English primary care 2003-2013: Time trend analyses of effects of the economic recession, and the GP contract quality outcomes framework (QOF). *J Affect Disord* 2015;180:68-78. <https://doi.org/10.1016/j.jad.2015.03.040>
17. Barnett K, Mercer SW, Norbury M, *et al.* Epidemiology of multimorbidity and implications for health care, research, and medical education: a cross-sectional study. *Lancet* 2012;380:37-43. [https://doi.org/10.1016/S0140-6736\(12\)60240-2](https://doi.org/10.1016/S0140-6736(12)60240-2)

- 1  
2  
3 18. McLean G, Guthrie B, Mercer SW, *et al*. General practice funding underpins the persistence of  
4 the inverse care law: cross-sectional study in Scotland. *Br J Gen Pract* 2015;65:e799-805.  
5 <https://doi.org/10.3399/bjgp15X687829>  
6  
7 19. Leiser S, Deruaz-Luyet A, N'Goran AA, *et al*. Determinants associated with deprivation in  
8 multimorbid patients in primary care-A cross-sectional study in Switzerland. *PLoS One*  
9 2017;12:e0181534. <https://doi.org/10.1371/journal.pone.0181534>  
10  
11 20. McLean G, Gunn J, Wyke S, *et al*. The influence of socioeconomic deprivation on multimorbidity  
12 at different ages: a cross-sectional study. *Br J Gen Pract* 2014;64:e440-7.  
13 <https://doi.org/10.3399/bjgp14X680545>  
14  
15 21. Lambeth. Demographic factsheet, May 2015. Lambeth & Southwark's Public Health Intelligence  
16 Team, 2015. <https://www.lambeth.gov.uk/sites/default/files/ssh-lambeth-demography-2015.pdf>  
17  
18 22. Multimorbidity: a priority for global health research. Academy of Medical Sciences. London,  
19 2018. <https://acmedsci.ac.uk/file-download/82222577>  
20  
21 23. Ruel G, Levesque JF, Stocks N, *et al*. Understanding the evolution of multimorbidity: evidences  
22 from the North West Adelaide Health Longitudinal Study (NWAHS). *PLoS One* 2014;9:e96291.  
23 <https://doi.org/10.1371/journal.pone.0096291>  
24  
25 24. Xu X, Mishra GD, Dobson AJ, *et al*. Progression of diabetes, heart disease, and stroke  
26 multimorbidity in middle-aged women: A 20-year cohort study. *PLoS Med* 2018;15:e1002516.  
27 <https://doi.org/10.1371/journal.pmed.1002516>  
28  
29 25. St Sauver JL, Boyd CM, Grossardt BR, *et al*. Risk of developing multimorbidity across all ages in an  
30 historical cohort study: differences by sex and ethnicity. *BMJ Open* 2015;5:e006413.  
31 <https://doi.org/10.1136/bmjopen-2014-006413>  
32  
33  
34  
35  
36  
37  
38  
39  
40  
41  
42  
43  
44  
45  
46  
47  
48  
49  
50  
51  
52  
53  
54  
55  
56  
57  
58  
59  
60

**Figure 1a:** Acquisition sequence of Long Term Conditions in the multimorbidity cohort (n = 5196); data excluded if simultaneous onset dates.

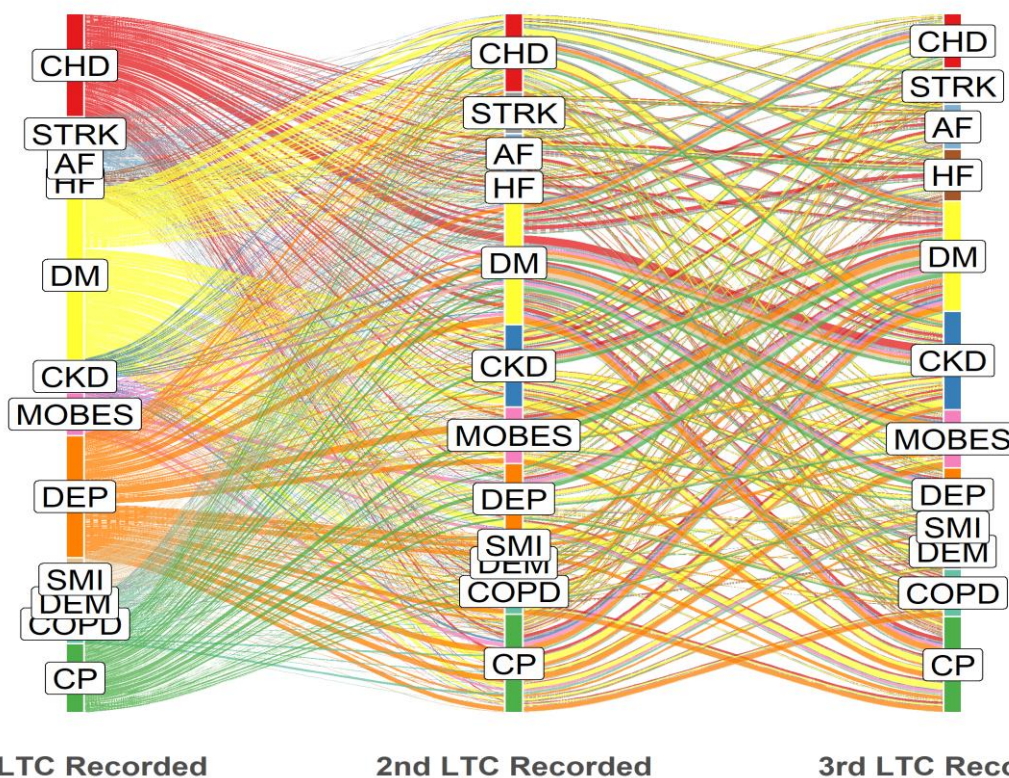

Long Term Condition label abbreviations (n = 12): CHD = Coronary Heart Disease; STRK = Stroke; AF = Atrial Fibrillation; HF = Heart Failure; DM = Diabetes; CKD = Chronic Kidney Disease; MOBES = Morbid Obesity; Dep = Depression; SMI = Serious Mental Illness; DEM = Dementia; COPD = Chronic Obstructive Pulmonary Disease; CP = Chronic Pain.

**Figure 1b:** Acquisition sequence of Long Term Conditions; dominant pathways displayed with patient flows  $\geq 35$  (n = 769).

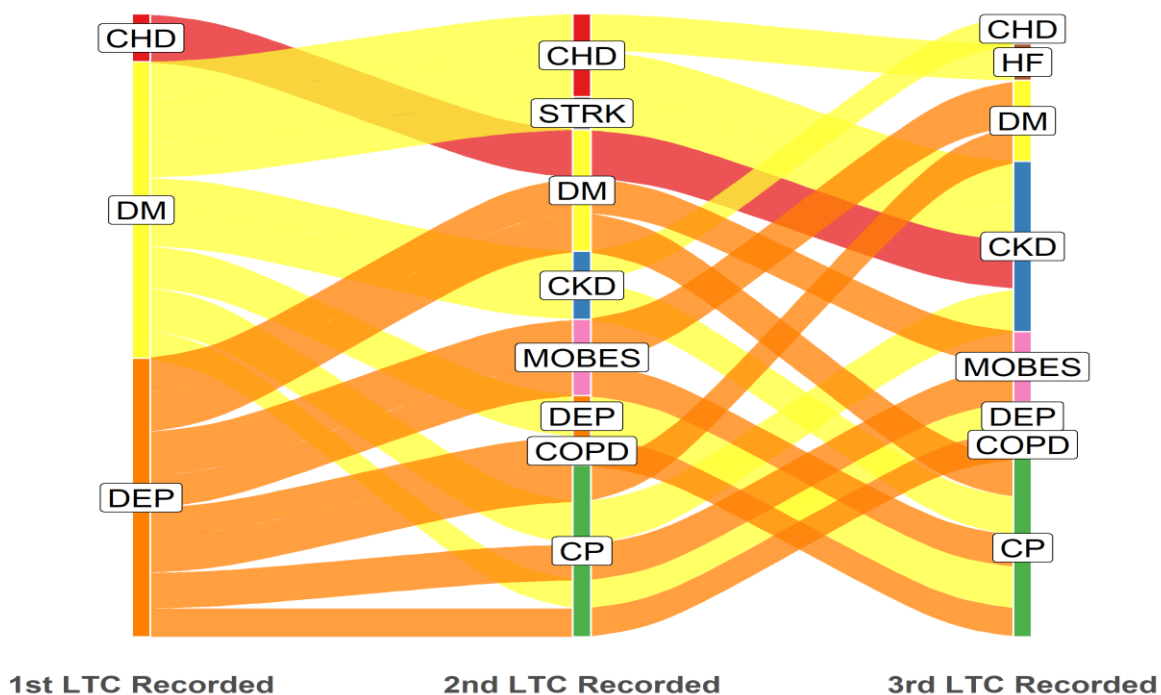



**Figure 2a:** Most deprived quintile: alluvial plot displaying acquisition sequence of Long Term Conditions in the multimorbidity cohort (n = 1394).

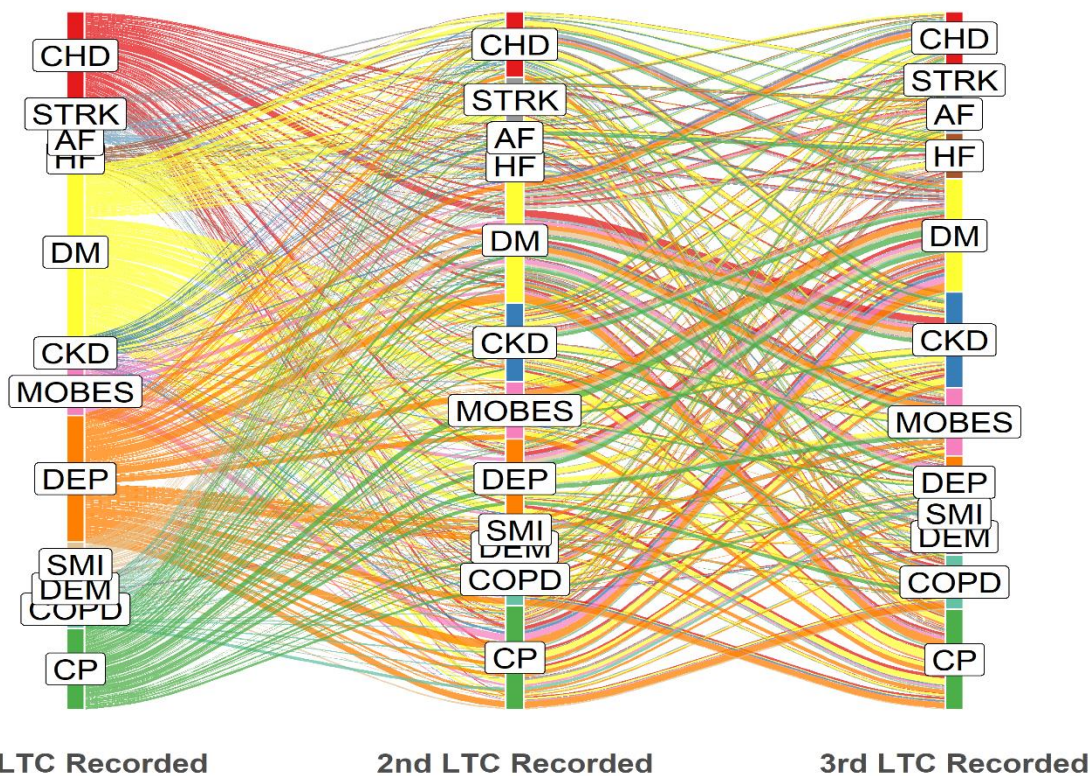

**Figure 2b:** Most deprived quintile: dominant pathways displayed with patient flows  $\geq 13$  (n = 145).

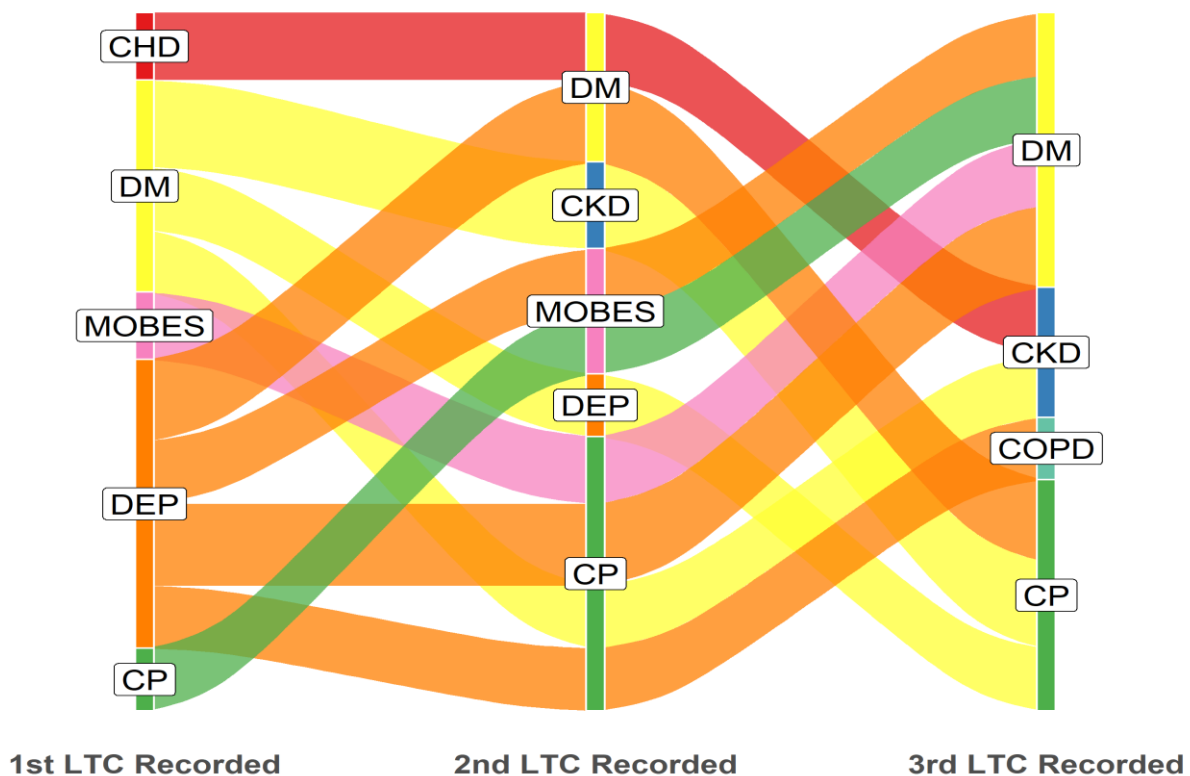

**Figure 3a:** Least deprived quintile: alluvial plot displaying acquisition sequence of Long Term Conditions in the multimorbidity cohort (n = 763).

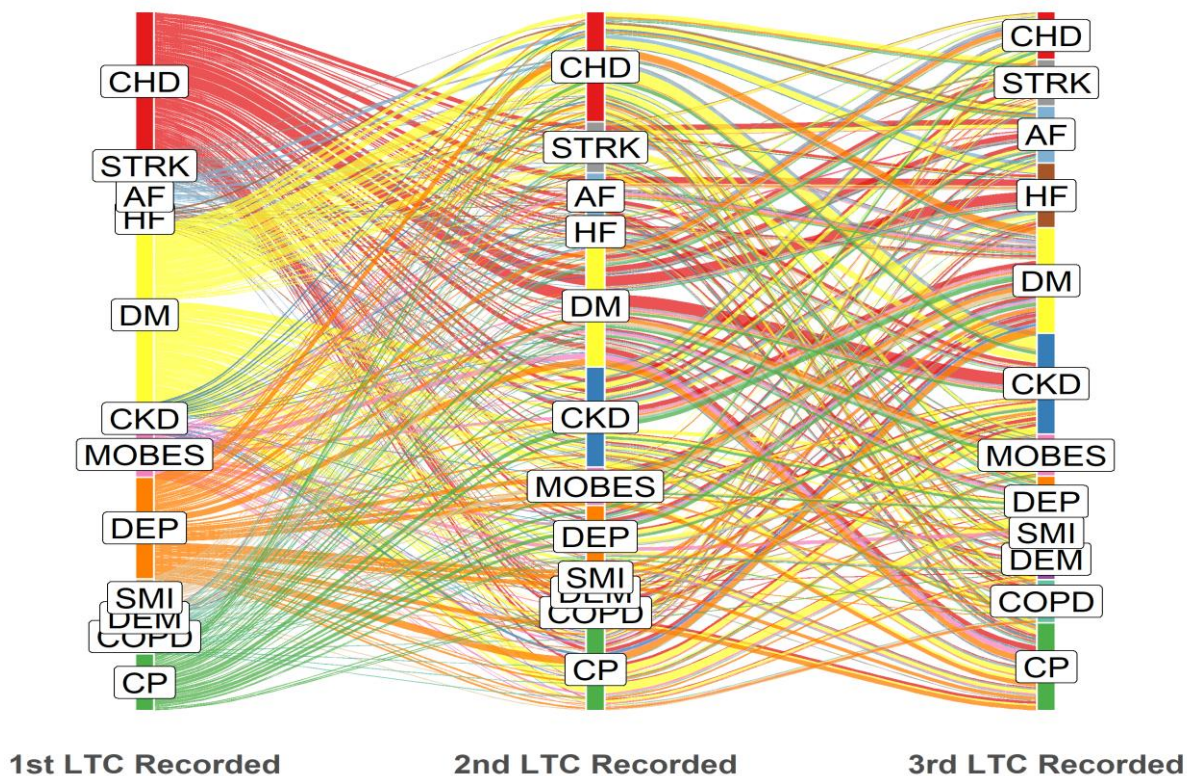

**Figure 3b:** Least deprived quintile: dominant pathways displayed with patient flows  $\geq 8$  (n = 89).

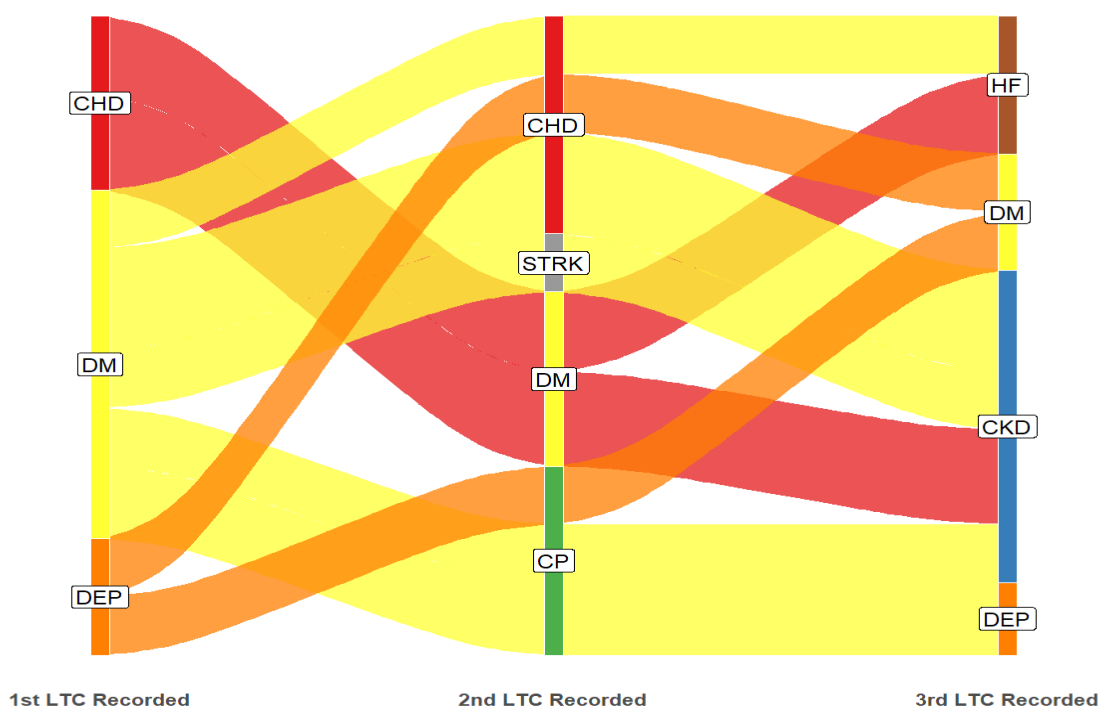

Figure 4a: 'White' ethnic group: alluvial plot displaying acquisition sequence of Long Term Conditions in the multimorbidity cohort (n = 2788).

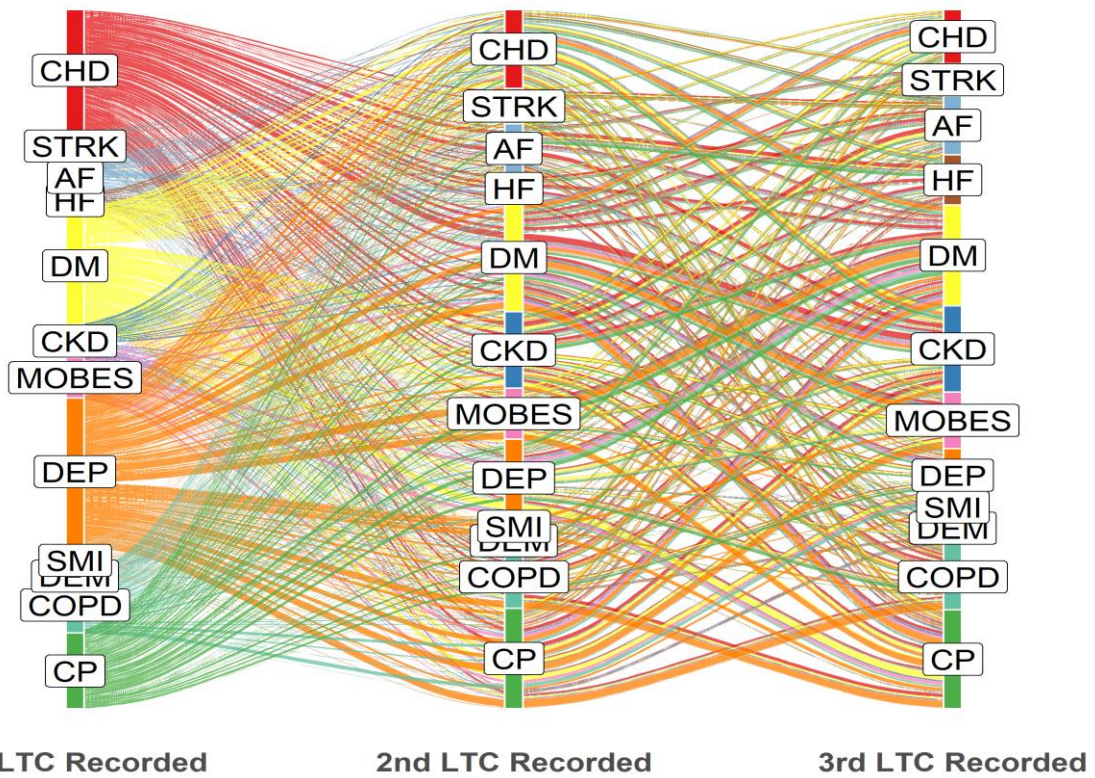

Figure 4b: 'White' ethnic group: dominant pathways displayed with patient flows  $\geq 18$  (n = 287).

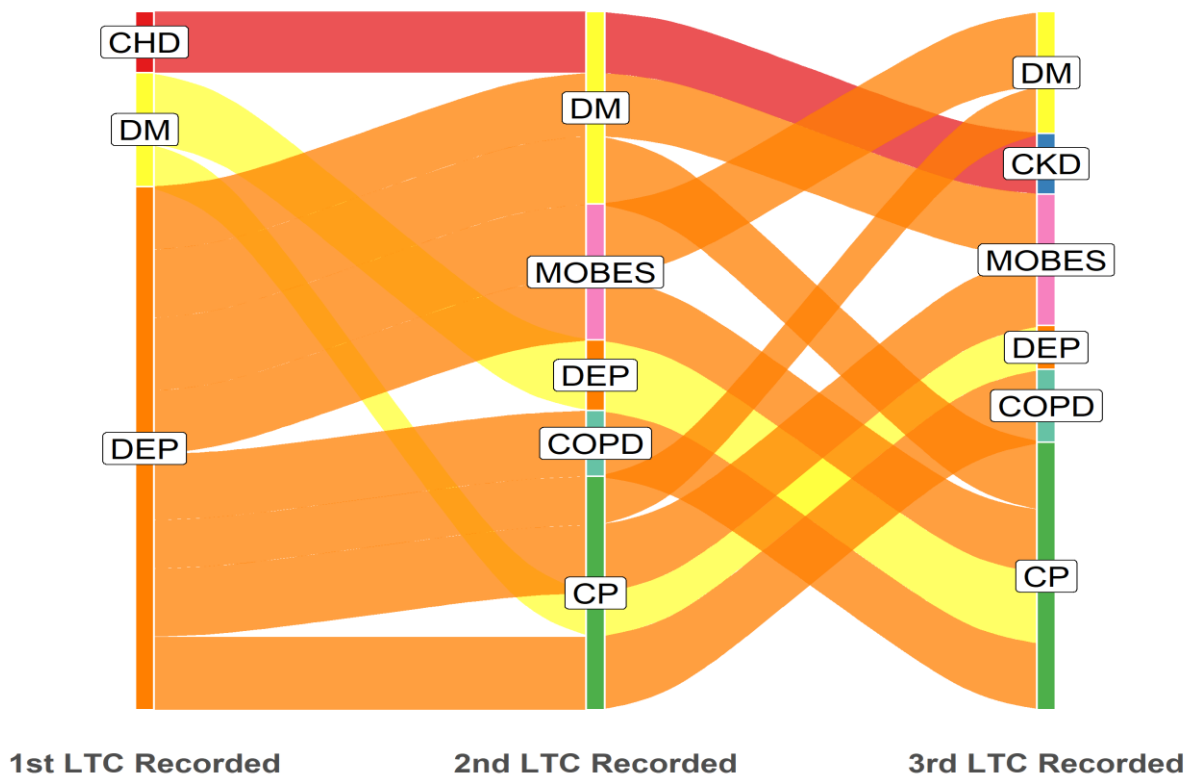

**Figure 5a:** 'Black' ethnic group: alluvial plot displaying acquisition sequence of Long Term Conditions in the multimorbidity cohort (n = 1448).

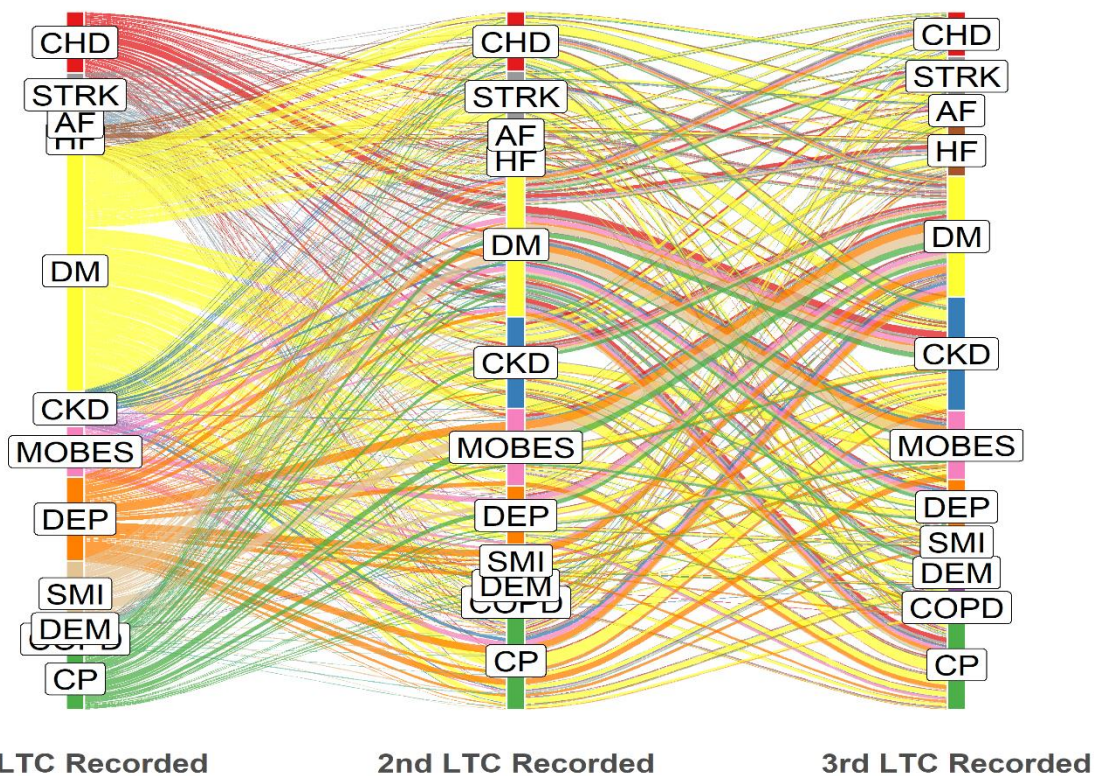

**Figure 5b:** 'Black' ethnic group: dominant pathways displayed with patient flows  $\geq 15$  (n = 227).

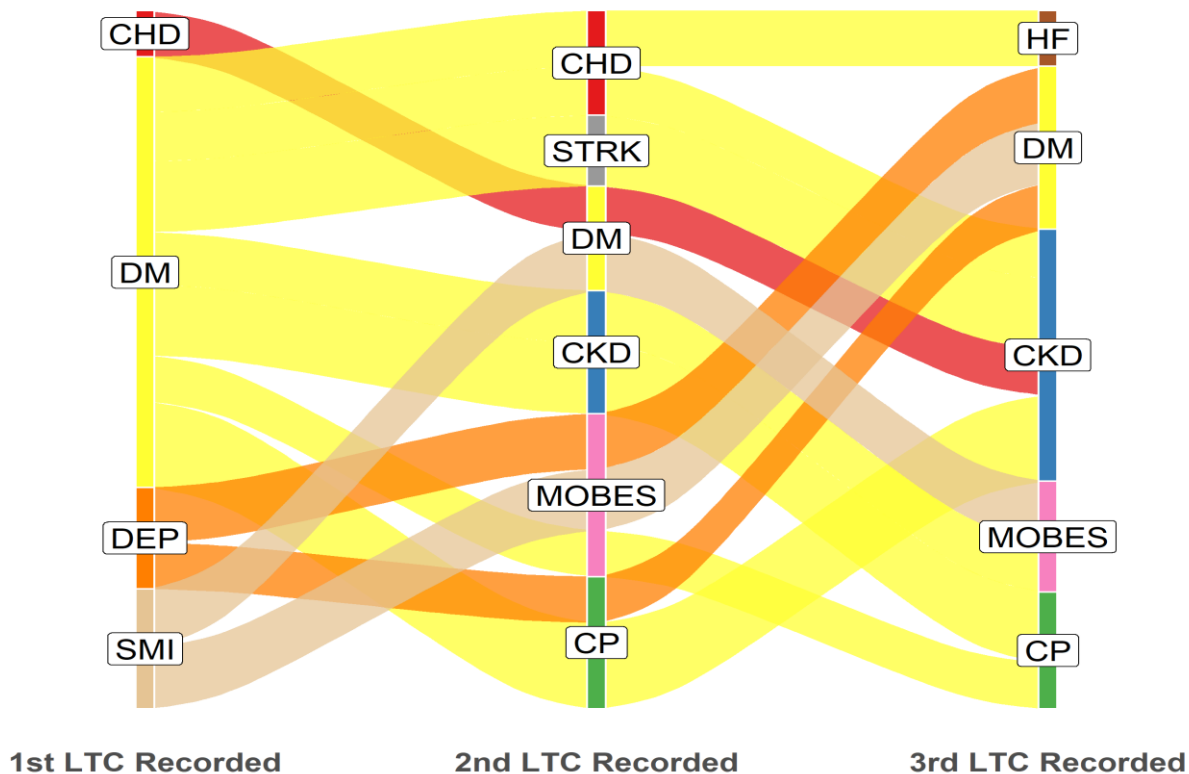

**Figure 6a:** Age under 65 years: dominant pathways displayed with patient flows  $\geq 25$  (n = 343).

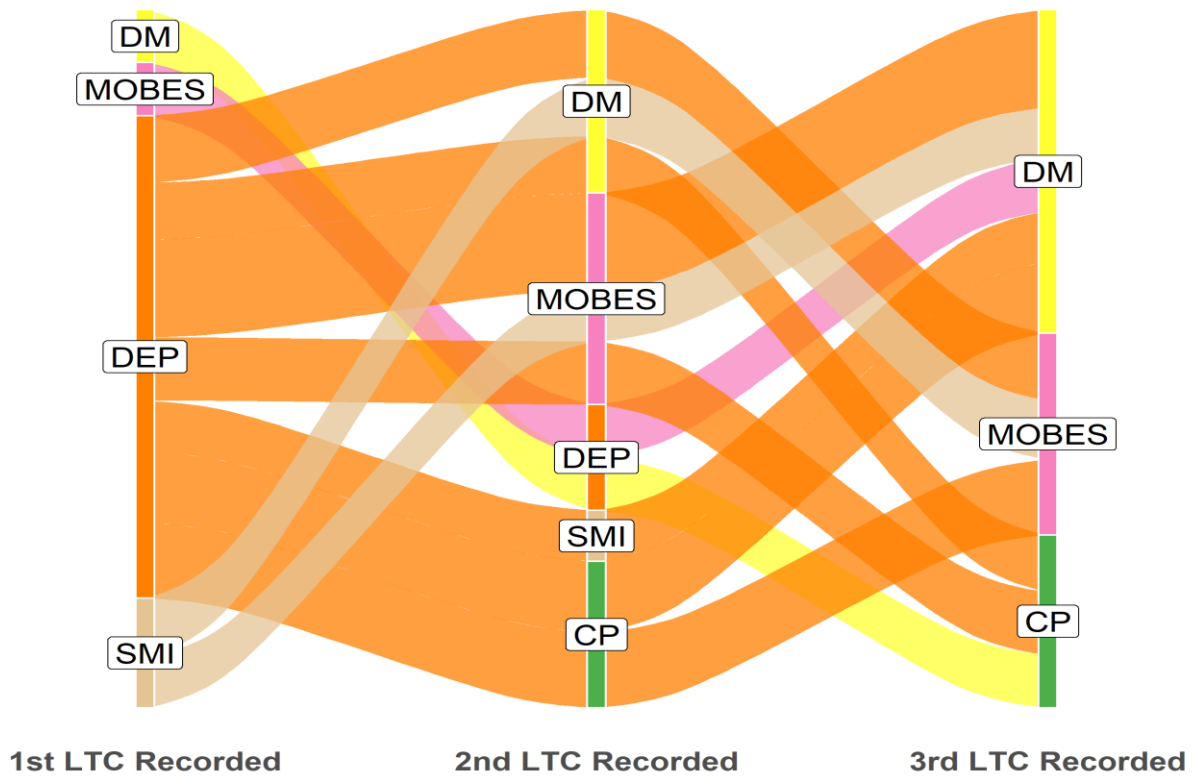

**Figure 6b:** Age 65 years and over: dominant pathways displayed with patient flows  $\geq 20$  (n = 536).

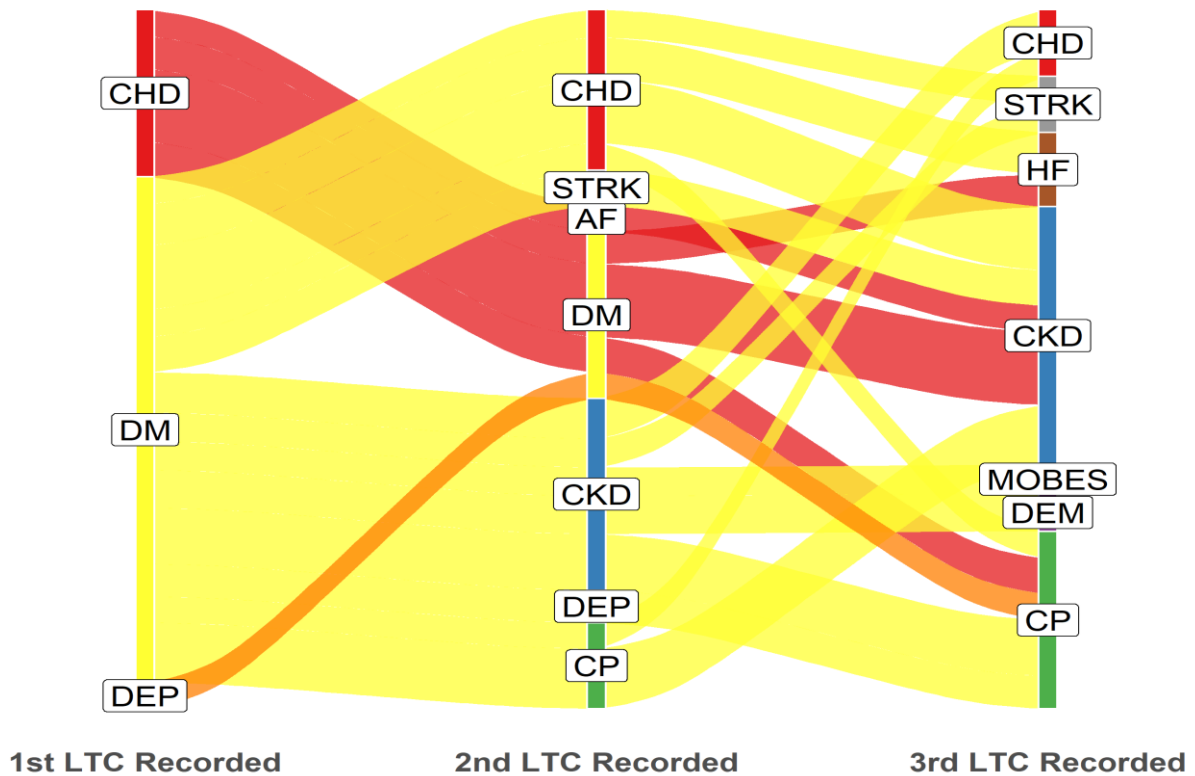

Supplementary File

Figure 1a: Area under Receiver Operating Characteristic (ROC) curve = 0.84; based on regression model presented in Table 5.

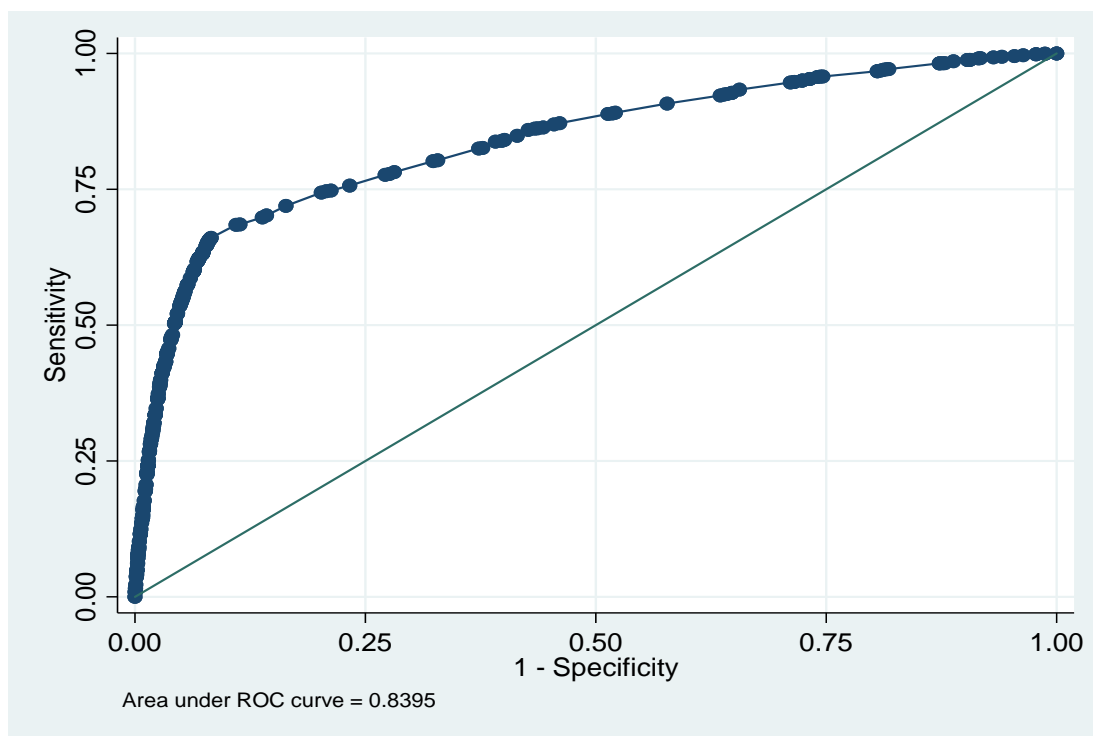

Figure 1b: Area under Receiver Operating Characteristic (ROC) curve = 0.93; based on regression model presented in Table 5 with the addition of three risk factors: Hypertension, Smoking (ever), Obesity (moderate).

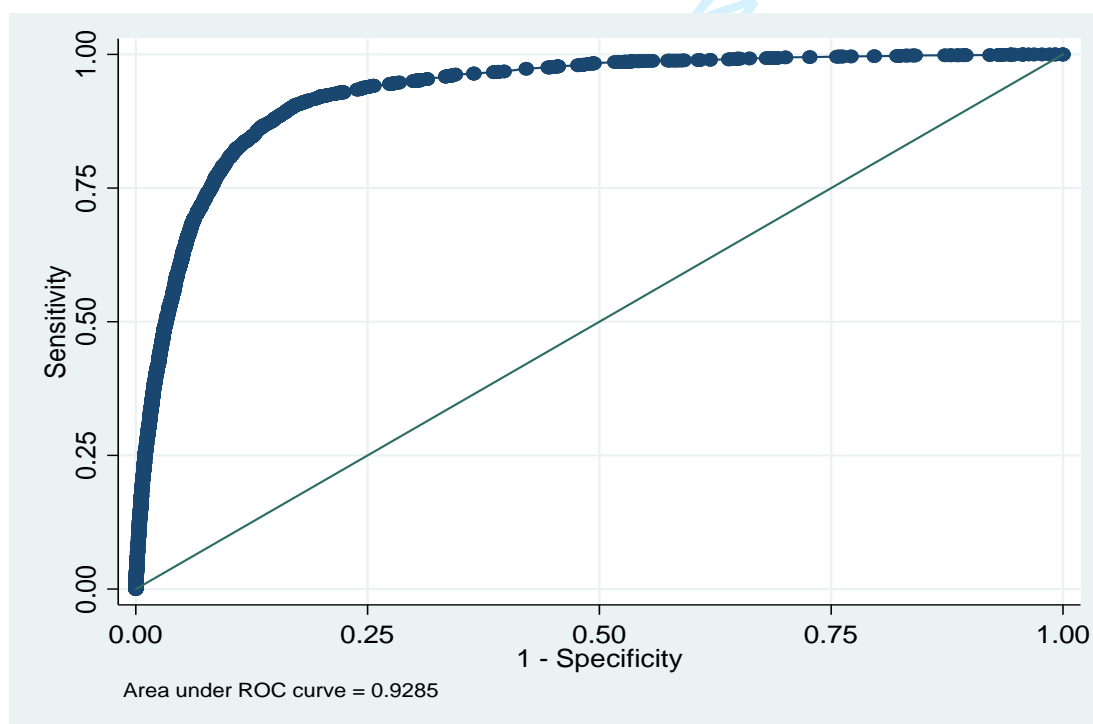

STROBE Statement—checklist of items that should be included in reports of observational studies

|                           | Item No. | Recommendation                                                                                      | Page No. | Relevant text from manuscript                                                                                                                                                                                                                                                                                         |
|---------------------------|----------|-----------------------------------------------------------------------------------------------------|----------|-----------------------------------------------------------------------------------------------------------------------------------------------------------------------------------------------------------------------------------------------------------------------------------------------------------------------|
| <b>Title and abstract</b> | 1        | (a) Indicate the study’s design with a commonly used term in the title or the abstract              | 1        | “Cross-sectional analysis and longitudinal study”                                                                                                                                                                                                                                                                     |
|                           |          | (b) Provide in the abstract an informative and balanced summary of what was done and what was found | 1        | Summarised in Abstract: Design, Setting, Participants, Main outcome measures, Results                                                                                                                                                                                                                                 |
| <b>Introduction</b>       |          |                                                                                                     |          |                                                                                                                                                                                                                                                                                                                       |
| Background/rationale      | 2        | Explain the scientific background and rationale for the investigation being reported                | 3-4      | The association between multimorbidity and social determinants and risk factors has not previously been determined in a deprived multi-ethnic community; identifying both the determinants of multimorbidity and the acquisition sequence may suggest interventions to prevent multimorbidity of slow its progression |
| Objectives                | 3        | State specific objectives, including any prespecified hypotheses                                    | 1        | “To study the social determinants and risk factors for multimorbidity and the acquisition sequence of multimorbidity”                                                                                                                                                                                                 |
| <b>Methods</b>            |          |                                                                                                     |          |                                                                                                                                                                                                                                                                                                                       |
| Study design              | 4        | Present key elements of study design early in the paper                                             | 5        | Presented under ‘Data Variables’ and ‘Data Analysis’.                                                                                                                                                                                                                                                                 |

|              |   |                                                                                                                                                                                                                                                                                                                                                                                                                                                                        |     |                                                                                                                                                                                                                                                                                                                                           |
|--------------|---|------------------------------------------------------------------------------------------------------------------------------------------------------------------------------------------------------------------------------------------------------------------------------------------------------------------------------------------------------------------------------------------------------------------------------------------------------------------------|-----|-------------------------------------------------------------------------------------------------------------------------------------------------------------------------------------------------------------------------------------------------------------------------------------------------------------------------------------------|
| Setting      | 5 | Describe the setting, locations, and relevant dates, including periods of recruitment, exposure, follow-up, and data collection                                                                                                                                                                                                                                                                                                                                        | 3   | Presented under ‘Study Setting’, ‘Study Design’, ‘Study population’.                                                                                                                                                                                                                                                                      |
| Participants | 6 | (a) <i>Cohort study</i> —Give the eligibility criteria, and the sources and methods of selection of participants. Describe methods of follow-up<br><i>Case-control study</i> —Give the eligibility criteria, and the sources and methods of case ascertainment and control selection. Give the rationale for the choice of cases and controls<br><i>Cross-sectional study</i> —Give the eligibility criteria, and the sources and methods of selection of participants | 4-5 | Cross-sectional study: all patients registered at general practices in one south London borough (Lambeth) with the exception of those with an ‘informed dissent’ code in their case-notes.<br>Longitudinal component: the same cohort of patients studied from onset of first Long Term Condition (LTC) to acquisition of 3 or more LTCs. |
|              |   | (b) <i>Cohort study</i> —For matched studies, give matching criteria and number of exposed and unexposed<br><i>Case-control study</i> —For matched studies, give matching criteria and the number of controls per case                                                                                                                                                                                                                                                 |     |                                                                                                                                                                                                                                                                                                                                           |
| Variables    | 7 | Clearly define all outcomes, exposures, predictors, potential confounders, and effect modifiers. Give diagnostic criteria, if applicable                                                                                                                                                                                                                                                                                                                               | 5   | Summarised under the heading, ‘Data Variables’: “...routinely collected, anonymised, patient-level Read, EMIS and SNOMED coded information. Data were extracted from the EHR into a secure data warehouse ....and contained information on patient demographic characteristics,                                                           |



1  
2  
3  
4  
5  
6  
7  
8  
9  
10  
11  
12  
13  
14  
15  
16  
17  
18  
19  
20  
21  
22  
23  
24  
25  
26  
27  
28  
29  
30  
31  
32  
33  
34  
35  
36  
37  
38  
39  
40  
41  
42  
43  
44  
45  
46

|                              |    |                                                                                                                                                                                      |     |                                                                                                                                                                                                                                                                                           |
|------------------------------|----|--------------------------------------------------------------------------------------------------------------------------------------------------------------------------------------|-----|-------------------------------------------------------------------------------------------------------------------------------------------------------------------------------------------------------------------------------------------------------------------------------------------|
|                              |    |                                                                                                                                                                                      |     | LTCs, clinical values and medication.”                                                                                                                                                                                                                                                    |
| Data sources/<br>measurement | 8* | For each variable of interest, give sources of data and details of methods of assessment (measurement). Describe comparability of assessment methods if there is more than one group | 5   | All data was derived from the Electronic Health Record of patients registered at GP practices in the sample area.                                                                                                                                                                         |
| Bias                         | 9  | Describe any efforts to address potential sources of bias                                                                                                                            | 5-6 | Patient records were all included in the analysis, reducing sampling bias. However, 4.0% of patients had an ‘informed dissent’ code in their case-notes, prohibiting any access to data. We were therefore unable to determine if the omission of these patients may have introduced bias |
| Study size                   | 10 | Explain how the study size was arrived at                                                                                                                                            | 5-6 | As above – the sample of 332,353 patients represented all patients registered at GP practices in the study area, with the exception of those with informed dissent codes. All Odds Ratios were presented with 95% CI’s so that the effect of small numbers on the CI could be seen        |

Continued on next page

For peer review only

|    |                        |     |                                                                                                                                                                                                   |            |                                                                                                                                                                              |
|----|------------------------|-----|---------------------------------------------------------------------------------------------------------------------------------------------------------------------------------------------------|------------|------------------------------------------------------------------------------------------------------------------------------------------------------------------------------|
| 1  |                        |     |                                                                                                                                                                                                   |            |                                                                                                                                                                              |
| 2  | Quantitative variables | 11  | Explain how quantitative variables were handled in the analyses. If applicable, describe which groupings were chosen and why                                                                      | 5/6        | Quantitative variables analysed according to description in section headed, 'Data Analysis'.                                                                                 |
| 3  |                        |     |                                                                                                                                                                                                   |            |                                                                                                                                                                              |
| 4  |                        |     |                                                                                                                                                                                                   |            |                                                                                                                                                                              |
| 5  |                        |     |                                                                                                                                                                                                   |            |                                                                                                                                                                              |
| 6  | Statistical methods    | 12  | (a) Describe all statistical methods, including those used to control for confounding                                                                                                             | 5/6        | Regression modelling – see 'Data Analysis'                                                                                                                                   |
| 7  |                        |     | (b) Describe any methods used to examine subgroups and interactions                                                                                                                               | 6          | Sub-groups of the key predictor variables were stratified (into age bands, deprivation quintiles, major ethnic groups)                                                       |
| 8  |                        |     |                                                                                                                                                                                                   |            |                                                                                                                                                                              |
| 9  |                        |     |                                                                                                                                                                                                   |            |                                                                                                                                                                              |
| 10 |                        |     |                                                                                                                                                                                                   |            |                                                                                                                                                                              |
| 11 |                        |     |                                                                                                                                                                                                   |            |                                                                                                                                                                              |
| 12 |                        |     |                                                                                                                                                                                                   |            |                                                                                                                                                                              |
| 13 |                        |     | (c) Explain how missing data were addressed                                                                                                                                                       | 5/6        | See section on missing demographic codes, missing clinical codes, 'informed dissent codes'.                                                                                  |
| 14 |                        |     |                                                                                                                                                                                                   |            |                                                                                                                                                                              |
| 15 |                        |     |                                                                                                                                                                                                   |            |                                                                                                                                                                              |
| 16 |                        |     |                                                                                                                                                                                                   |            |                                                                                                                                                                              |
| 17 |                        |     |                                                                                                                                                                                                   |            |                                                                                                                                                                              |
| 18 |                        |     | (d) <i>Cohort study</i> —If applicable, explain how loss to follow-up was addressed                                                                                                               | n/a        | The study was not a sample                                                                                                                                                   |
| 19 |                        |     | <i>Case-control study</i> —If applicable, explain how matching of cases and controls was addressed                                                                                                |            |                                                                                                                                                                              |
| 20 |                        |     | <i>Cross-sectional study</i> —If applicable, describe analytical methods taking account of sampling strategy                                                                                      |            |                                                                                                                                                                              |
| 21 |                        |     |                                                                                                                                                                                                   |            |                                                                                                                                                                              |
| 22 |                        |     |                                                                                                                                                                                                   |            |                                                                                                                                                                              |
| 23 |                        |     | (e) Describe any sensitivity analyses                                                                                                                                                             | 8          | See heading 'Sensitivity analyses'                                                                                                                                           |
| 24 |                        |     |                                                                                                                                                                                                   |            |                                                                                                                                                                              |
| 25 | <b>Results</b>         |     |                                                                                                                                                                                                   |            |                                                                                                                                                                              |
| 26 | Participants           | 13* | (a) Report numbers of individuals at each stage of study—eg numbers potentially eligible, examined for eligibility, confirmed eligible, included in the study, completing follow-up, and analysed | 6/7        | Summarised under 'Multimorbidity cohort characteristics'.                                                                                                                    |
| 27 |                        |     | (b) Give reasons for non-participation at each stage                                                                                                                                              | n/a        | n/a (exclusion criteria stated above)                                                                                                                                        |
| 28 |                        |     | (c) Consider use of a flow diagram                                                                                                                                                                | n/a        | Exclusion criteria summarised on pg4-6 without use of a Flow diagram                                                                                                         |
| 29 |                        |     |                                                                                                                                                                                                   |            |                                                                                                                                                                              |
| 30 |                        |     |                                                                                                                                                                                                   |            |                                                                                                                                                                              |
| 31 |                        |     |                                                                                                                                                                                                   |            |                                                                                                                                                                              |
| 32 |                        |     |                                                                                                                                                                                                   |            |                                                                                                                                                                              |
| 33 |                        |     |                                                                                                                                                                                                   |            |                                                                                                                                                                              |
| 34 | Descriptive data       | 14* | (a) Give characteristics of study participants (eg demographic, clinical, social) and information on exposures and potential confounders                                                          | Tables 1,2 | Table 1 summarises, 'Frequencies of Long Term Conditions included in the multimorbidity cohort'; Table 2 summarises, 'Demographic characteristics of multimorbidity cohort'. |
| 35 |                        |     |                                                                                                                                                                                                   |            |                                                                                                                                                                              |
| 36 |                        |     |                                                                                                                                                                                                   |            |                                                                                                                                                                              |
| 37 |                        |     |                                                                                                                                                                                                   |            |                                                                                                                                                                              |
| 38 |                        |     |                                                                                                                                                                                                   |            |                                                                                                                                                                              |
| 39 |                        |     |                                                                                                                                                                                                   |            |                                                                                                                                                                              |
| 40 |                        |     |                                                                                                                                                                                                   |            |                                                                                                                                                                              |
| 41 |                        |     |                                                                                                                                                                                                   |            |                                                                                                                                                                              |
| 42 |                        |     |                                                                                                                                                                                                   |            |                                                                                                                                                                              |

1  
2  
3  
4  
5  
6  
7  
8  
9  
10  
11  
12  
13  
14  
15  
16  
17  
18  
19  
20  
21  
22  
23  
24  
25  
26  
27  
28  
29  
30  
31  
32  
33  
34  
35  
36  
37  
38  
39  
40  
41  
42  
43  
44  
45  
46

1  
2  
3  
4  
5  
6  
7  
8  
9  
10  
11  
12  
13  
14  
15  
16  
17  
18  
19  
20  
21  
22  
23  
24  
25  
26  
27  
28  
29  
30  
31  
32  
33  
34  
35  
36  
37  
38  
39  
40  
41  
42  
43  
44  
45  
46

|              |     |                                                                                                                                                                                                              |            |                                                                                                                                                                                                                       |
|--------------|-----|--------------------------------------------------------------------------------------------------------------------------------------------------------------------------------------------------------------|------------|-----------------------------------------------------------------------------------------------------------------------------------------------------------------------------------------------------------------------|
|              |     | (b) Indicate number of participants with missing data for each variable of interest                                                                                                                          | 5/6        | Missing data numbers summarised under, ‘Multimorbidity cohort characteristics’                                                                                                                                        |
|              |     | (c) <i>Cohort study</i> —Summarise follow-up time (eg, average and total amount)                                                                                                                             | n/a        |                                                                                                                                                                                                                       |
| Outcome data | 15* | <i>Cohort study</i> —Report numbers of outcome events or summary measures over time                                                                                                                          | n/a        |                                                                                                                                                                                                                       |
|              |     | <i>Case-control study</i> —Report numbers in each exposure category, or summary measures of exposure                                                                                                         | n/a        |                                                                                                                                                                                                                       |
|              |     | <i>Cross-sectional study</i> —Report numbers of outcome events or summary measures                                                                                                                           | 13         | Summary measures in Table 2                                                                                                                                                                                           |
| Main results | 16  | (a) Give unadjusted estimates and, if applicable, confounder-adjusted estimates and their precision (eg, 95% confidence interval). Make clear which confounders were adjusted for and why they were included | Tables 1-5 | Univariable analysis presented in Tables 1, 2. Multivariable analysis presented in Tables 3,4,5. Table 3 includes different confounder variables to Tables 4,5. All confounder variables are presented in the Tables. |
|              |     | (b) Report category boundaries when continuous variables were categorized                                                                                                                                    | Tables 2-5 | Continuous variables were categorised: ‘age’ into 3 age bands; social deprivation into quintiles                                                                                                                      |
|              |     | (c) If relevant, consider translating estimates of relative risk into absolute risk for a meaningful time period                                                                                             | n/a        | The study was about the high risk of multimorbidity in specified groups, comparing the power of risk factors.                                                                                                         |

Continued on next page

|                          |    |                                                                                                                                                                            |                               |                                                                                                                                                                                   |
|--------------------------|----|----------------------------------------------------------------------------------------------------------------------------------------------------------------------------|-------------------------------|-----------------------------------------------------------------------------------------------------------------------------------------------------------------------------------|
| Other analyses           | 17 | Report other analyses done—eg analyses of subgroups and interactions, and sensitivity analyses                                                                             | Table 5; Supplementary file 1 | Sensitivity analyses summarised: logistic regression adjusted for clustering; Receiver Operating Characteristic curve                                                             |
| <b>Discussion</b>        |    |                                                                                                                                                                            |                               |                                                                                                                                                                                   |
| Key results              | 18 | Summarise key results with reference to study objectives                                                                                                                   | 13/14                         | Key finding summarised at opening of Discussion. The demographic and risk factors for multimorbidity are defined. The acquisition sequence of multimorbidity is described.        |
| Limitations              | 19 | Discuss limitations of the study, taking into account sources of potential bias or imprecision. Discuss both direction and magnitude of any potential bias                 | 14/15                         | Discussed under heading, 'Strengths and Limitations'                                                                                                                              |
| Interpretation           | 20 | Give a cautious overall interpretation of results considering objectives, limitations, multiplicity of analyses, results from similar studies, and other relevant evidence | 15-17                         | Cautious interpretation summarised with reference to the literature. Cautious conclusion reached about possible interventions to prevent or delay multimorbidity onset.           |
| Generalisability         | 21 | Discuss the generalisability (external validity) of the study results                                                                                                      | 14/15                         | Summarised under, 'Strengths and Limitations'. Findings were derived from one deprived, multi-ethnic community and may not generalise to less deprived, less diverse populations. |
| <b>Other information</b> |    |                                                                                                                                                                            |                               |                                                                                                                                                                                   |
| Funding                  | 22 | Give the source of funding and the role of the funders for the present study and, if applicable, for the original study on which the present article is based              | 18/19                         | The study was funded by the Guy's and St Thomas' Charity                                                                                                                          |

\*Give information separately for cases and controls in case-control studies and, if applicable, for exposed and unexposed groups in cohort and cross-sectional studies.

1  
2  
3  
4  
5  
6  
7  
8  
9  
10  
11  
12  
13  
14  
15  
16  
17  
18  
19  
20  
21  
22  
23  
24  
25  
26  
27  
28  
29  
30  
31  
32  
33  
34  
35  
36  
37  
38  
39  
40  
41  
42  
43  
44  
45  
46

**Note:** An Explanation and Elaboration article discusses each checklist item and gives methodological background and published examples of transparent reporting. The STROBE checklist is best used in conjunction with this article (freely available on the Web sites of PLoS Medicine at <http://www.plosmedicine.org/>, Annals of Internal Medicine at <http://www.annals.org/>, and Epidemiology at <http://www.epidem.com/>). Information on the STROBE Initiative is available at [www.strobe-statement.org](http://www.strobe-statement.org).

For peer review only

# BMJ Open

## The journey to multimorbidity: a longitudinal analysis exploring cardiovascular risk factors and determinants in an urban setting

|                                 |                                                                                                                                                                                                                                                                                                                                                                                                                                                                                                                                                                                                                                                                                              |
|---------------------------------|----------------------------------------------------------------------------------------------------------------------------------------------------------------------------------------------------------------------------------------------------------------------------------------------------------------------------------------------------------------------------------------------------------------------------------------------------------------------------------------------------------------------------------------------------------------------------------------------------------------------------------------------------------------------------------------------|
| Journal:                        | <i>BMJ Open</i>                                                                                                                                                                                                                                                                                                                                                                                                                                                                                                                                                                                                                                                                              |
| Manuscript ID                   | bmjopen-2019-031649.R1                                                                                                                                                                                                                                                                                                                                                                                                                                                                                                                                                                                                                                                                       |
| Article Type:                   | Original research                                                                                                                                                                                                                                                                                                                                                                                                                                                                                                                                                                                                                                                                            |
| Date Submitted by the Author:   | 29-Aug-2019                                                                                                                                                                                                                                                                                                                                                                                                                                                                                                                                                                                                                                                                                  |
| Complete List of Authors:       | Ashworth, Mark; King's College London Faculty of Life Sciences and Medicine, School of Population Health & Environmental Sciences<br>Durbaba, Stevo; King's College London Faculty of Life Sciences and Medicine, School of Population Health & Environmental Sciences<br>Whitney, David; King's College London Faculty of Life Sciences and Medicine, School of Population Health & Environmental Sciences<br>Crompton, James; London Borough of Lambeth, Public Health, Adults and Health<br>Wright, Michael; King's College London Faculty of Life Sciences and Medicine, School of Population Health & Environmental Sciences<br>Dodhia, Hiten; London Borough of Lambeth, Public Health |
| <b>Primary Subject Heading</b>: | General practice / Family practice                                                                                                                                                                                                                                                                                                                                                                                                                                                                                                                                                                                                                                                           |
| Secondary Subject Heading:      | Public health                                                                                                                                                                                                                                                                                                                                                                                                                                                                                                                                                                                                                                                                                |
| Keywords:                       | PRIMARY CARE, Multimorbidity, Demographic factors, Risk factors                                                                                                                                                                                                                                                                                                                                                                                                                                                                                                                                                                                                                              |
|                                 |                                                                                                                                                                                                                                                                                                                                                                                                                                                                                                                                                                                                                                                                                              |

SCHOLARONE™  
Manuscripts

**TITLE:**

The journey to multimorbidity: a longitudinal analysis exploring cardiovascular risk factors and determinants in an urban setting

**AUTHORS:**

Mark Ashworth<sup>1</sup>, Stevo Durbaba<sup>2</sup>, David Whitney<sup>3</sup>, James Crompton<sup>4</sup>, Michael Wright<sup>5</sup> Hiten Dodhia<sup>6</sup>.

1. Reader in Primary Care, School of Population Health & Environmental Sciences, King's College London, London, UK
2. e-Resources Developer, School of Population Health & Environmental Sciences, King's College London, London, UK
3. Data Analyst, School of Population Health & Environmental Sciences, King's College London, London, UK
4. Head of Health Intelligence, Public Health, Adults and Health, London Borough of Lambeth, London, UK
5. Project Manager, School of Population Health & Environmental Sciences, King's College London, London, UK
6. Consultant in Public Health, London Borough of Lambeth, London, UK

Corresponding author email: mark.ashworth@kcl.ac.uk

Word count: 3621

**ABSTRACT**

**Objective.** To study the social determinants and cardiovascular risk factors for multimorbidity and the acquisition sequence of multimorbidity.

**Design.** Longitudinal study based on anonymised primary care data.

**Setting.** General practices in an urban multi-ethnic borough in London, UK.

**Participants.** 332,353 patients aged  $\geq 18$  years

**Main outcome measures.** Clinical and socio-demographic characteristics of patients with multimorbidity, defined as  $\geq 3$  of 12 Long Term Conditions (LTCs) selected according to high predicted healthcare utilisation. Multilevel logistic regression was used to model the social determinants and risk factors for multimorbidity. Alluvial plots were constructed to illustrate multimorbidity acquisition sequences according to age, ethnicity and social deprivation.

1  
2  
3 **Results.** 5597 (1.7%) patients had  $\geq 3$  selected LTCs, the 'multimorbidity cohort'. The commonest  
4 LTCs were diabetes (63.0%) and chronic pain (42.8%). Social deprivation and ethnicity were  
5 independent determinants of multimorbidity: for most compared to least deprived quintile,  
6 Adjusted Odds Ratio (AOR) 1.56 (95%CI, 1.41, 1.72); for South Asian compared to white ethnicity,  
7 AOR 1.44 (95%CI, 1.29, 1.61); for black compared to white ethnicity, AOR 0.86 (95%CI, 0.80, 0.92).  
8 The included risk factors were relatively strong determinants of multimorbidity: hypertension, AOR  
9 5.05 (95%CI, 4.69, 5.44); moderate obesity, AOR 3.41 (95%CI, 3.21, 3.63); smoking, AOR 2.30  
10 (95%CI, 2.16, 2.45). The most common initial onset conditions were diabetes and depression;  
11 diabetes particularly in older and black ethnic groups; depression particularly in younger, more  
12 deprived and white ethnicity groups. Chronic pain was less common as an initial condition.  
13  
14  
15  
16  
17  
18  
19

20 **Conclusions** Our findings confirm the importance of age, social deprivation and ethnicity as  
21 determinants of multimorbidity. Smoking, obesity and hypertension as risk factors were stronger  
22 determinants of multimorbidity than deprivation or ethnicity. The acquisition sequence of  
23 multimorbidity is patterned by socio-demographic determinants. Understanding onset conditions of  
24 multimorbidity and cardiovascular risk factors may lead to the development of interventions to slow  
25 the progression of multimorbidity.  
26  
27  
28  
29  
30  
31  
32  
33

### 34 **Strengths and limitations**

- 35 • This study uses a definition of multimorbidity based on Long Term Conditions (LTCs) with  
36 high predicted healthcare utilisation rates
- 37 • Multimorbidity is studied in a deprived, multi-ethnic community
- 38 • Longitudinal data is used to identify the acquisition sequence of multimorbidity and how  
39 this is influenced by socio-demographic determinants
- 40 • Difficulties gaining access to anonymised primary care data limited the sample size and may  
41 have contributed to selection bias
- 42 • Coding validation and completeness restricted the analysis of available primary care data
- 43
- 44
- 45
- 46
- 47
- 48
- 49
- 50
- 51
- 52
- 53
- 54
- 55
- 56
- 57
- 58
- 59
- 60



## BACKGROUND

Healthcare utilisation is increasingly driven by multimorbidity (1). Each long-term condition (LTC) included within a definition of multimorbidity is likely to generate multiple primary care consultations with general practitioners (GPs), practice nurses and other health care professionals, and may result in Accident and Emergency (A&E) attendances, referral to out-patient appointments and hospital admissions.

Estimates of healthcare utilisation attributable to multimorbidity vary according to the LTCs included within a definition of multimorbidity. There is no standard definition of multimorbidity. One systematic review noted that the number of included LTCs ranged from five to 185 with estimates of population prevalence ranging from 13.1% to 71.8% depending on the number of included conditions (2). In one recent UK study in which multimorbidity was defined as two or more of a selection of 36 LTCs, 27.2% of the population had multimorbidity, accounting for 52.9% of GP consultations and generating a median of nine annual GP consultations (3). LTCs also contribute to the development of frailty, itself a driver of healthcare utilisation (4).

In response to high demand for health and social care, many healthcare providers and commissioners have sought to identify those patients with greatest needs through a process termed 'risk stratification'. Several electronic tools have been developed to offer population based risk stratification (5). An alternative approach is the use of expert panels to define high-demand patient groups (6). Having identified the cohort of patients with the greatest requirement for health and social care services, the purpose of this process is to guide resource allocation on a needs basis, often with the implicit assumption that additional investment in a primary care setting may reduce demand for more expensive secondary care services. Although funding and healthcare need should align, there is little evidence that investment in additional community resources for those most at risk of hospital attendance results in overall reductions in secondary care utilisation (7).

1  
2  
3 Following a consultation exercise and report from an expert panel, two inner London boroughs and  
4 their commissioning groups made the decision to define multimorbidity based on predicted high  
5 healthcare and social care demand. Multimorbidity in this context consisted of three or more LTCs  
6 considered most likely to result in functional impairment and high service demand. This 'high service  
7 demand' definition was used to identify a cohort to receive a package of integrated care, termed  
8 'care coordination'. A focus on this narrowly defined category of multimorbidity would inevitably  
9 mean that the proportion of patients defined as 'multimorbid' would be lower than reported in  
10 studies based on broader definitions of multimorbidity (2,3).  
11  
12  
13  
14  
15  
16  
17  
18  
19  
20  
21

22 We aimed to study the characteristics of this multimorbidity cohort, defining both the socio-  
23 demographic determinants and cardiovascular risk factors associated with multimorbidity  
24 acquisition. Then to determine the acquisition sequence of multimorbidity and the influence of  
25 socio-demographic factors on this sequence. The aim was to study the characteristics of the  
26 multimorbidity cohort. The main objectives were to define both the socio-demographic  
27 determinants and cardiovascular risk factors associated with multimorbidity acquisition; also to  
28 determine the acquisition sequence of multimorbidity and the influence of demographic factors on  
29 this sequence.  
30  
31  
32  
33  
34  
35  
36  
37  
38  
39  
40  
41  
42

## 43 **METHODS**

### 44 **Study setting**

45  
46 Our study was set in Lambeth, one of the two inner London UK boroughs adopting the 'care  
47 coordination' definition of multimorbidity (8). The population sample consisted of all patients  
48 registered at all general practices in Lambeth, with the exception of patients who had opted out of  
49 anonymised data sharing for research purposes.  
50  
51  
52  
53  
54  
55  
56  
57

### 58 **Study design**

1  
2  
3 We conducted a longitudinal analysis based on anonymised coded primary care data extracted from  
4  
5 electronic health records (EHR) held in primary care.  
6  
7

### 8 **Study population**

9  
10  
11 We included data on all patients aged 18 years and over registered with a general practice. For the  
12  
13 population with multimorbidity, we included all those with LTCs recorded in the EHR and included in  
14  
15 the 'care coordination' definition of multimorbidity: Atrial Fibrillation (AF), Chronic Obstructive  
16  
17 Pulmonary Disease (COPD), Chronic Pain (CP), Chronic Kidney Disease (CKD), Coronary Heart Disease  
18  
19 (CHD), Diabetes (DM), Dementia, Depression, Heart Failure (HF), Serious Mental Illness (SMI), Stroke,  
20  
21 Morbid Obesity. The definition and specified codes for each condition was that used by the Quality  
22  
23 and Outcomes Framework (QOF), based on 'QOF38' definitions (9). Two of the conditions selected  
24  
25 for inclusion within the definition of multimorbidity were not included within the QOF: chronic pain,  
26  
27 defined on the basis of two or more repeat prescriptions for opioid analgesics (British National  
28  
29 Formulary, chapter 4.7.2) or neuropathic pain medication (British National Formulary, chapter 4.7.3)  
30  
31 (10); morbid obesity defined as a Body Mass Index  $\geq 40$  kg/m<sup>2</sup>. For each LTC, the date of onset was  
32  
33 obtained from the EHR and used in the longitudinal analysis.  
34  
35  
36  
37  
38

39 Demographic data consisted of gender, age in years and self-ascribed ethnicity obtained from the  
40  
41 EHR. Social deprivation data derived from residency data was based on the Index of Multiple  
42  
43 Deprivation 2010 classification at Lower Super Output Area (LSOA), stratified into locally based  
44  
45 quintiles (11). Local deprivation quintiles were used in place of national quintiles since mean  
46  
47 deprivation levels are high in Lambeth, the 22<sup>nd</sup> most deprived local authority (out of 326) in England  
48  
49 (12).  
50  
51

52 Cardiovascular risk factors included in the analysis were: hypertension (defined as patients on the  
53  
54 QOF Hypertension register); moderate obesity (defined as a Body Mass Index of 30.0-39.9; note that  
55  
56 patients with BMI  $\geq 40$  were included as one of the LTCs within the definition of multimorbidity and  
57  
58 therefore not included as a risk factor); smoking (patients with any record of being a smoker).  
59  
60

### Data variables

The data consisted of 'real world', routinely collected, anonymised, patient-level Read, EMIS and SNOMED coded information. Data were extracted from the EHR into a secure data warehouse and contained information on patient demographic characteristics, LTCs, clinical values and medication. The data used in this study were extracted in May 2018.

### Data analysis

We analysed socio-demographic (age, gender, ethnicity), social (area level deprivation) and cardiovascular risk factor (hypertension, moderate obesity, smoking status) data for the multimorbidity cohort and general population using univariable statistical methods applied at patient-level. Socio-demographic and risk factor determinants of multimorbidity were analysed at patient level using mixed effects multilevel logistic regression models, adding fixed effects to describe patient characteristics and random effects to describe general practice level, based on the registered general practice of each patient in the study sample. We also conducted a sensitivity analysis using mixed effects logistic regression models to allow for random effects, adjusted for clustering at the practice level. The sensitivity analysis allowed pseudo-r<sup>2</sup> values and Receiver Operating Characteristic (ROC) curves to be derived. Analysis was conducted using the statistical software package STATA IC 15 (13).

The acquisition sequence for patients in the multimorbidity cohort was established by searching the EHR for date of onset of each LTC. For this analysis, we established the order of acquisition and tabulated the frequency of first, second and third LTCs. We displayed findings using alluvial plots, an infographic allowing representation of multiple pathways. These were constructed using the software R, and the packages 'ggplot2' and 'ggalluvial' (14).

### Patient and public involvement

1  
2  
3 The borough based and statutory organisation, Lambeth HealthWatch, represented the interests of  
4 patients and public in this work; they contributed to the original protocol design and shared in  
5 dissemination of the findings.  
6  
7  
8  
9

## 10 11 12 13 **RESULTS**

### 14 15 16 **Multimorbidity cohort characteristics**

17  
18  
19 The final study population consisted of 332,353 patients aged  $\geq 18$  years. Data from 13,369 (4.0%)  
20 patients had been excluded because a data sharing opt-out code was recorded in their EHR. Patients  
21 were included in the final sample even though some socio-demographic data were missing: 3289  
22 (0.99%) patients could not be linked to a LSOA and therefore had missing IMD-2015 score data;  $\leq 10$   
23 patients had missing coded gender data;  $\leq 10$  patients had missing coded age data. Patients with any  
24 category of missing data ( $n = 3301$ ) were excluded from the multivariable analysis.  
25  
26  
27  
28  
29  
30  
31

32  
33 In all, 5597 (1.7%) patients had a record of three or more of the selected LTCs, the 'multimorbidity  
34 cohort'. Most ( $n = 3542$ ) of this cohort had three LTCs (63.3%); 1333 (23.8%) had four LTCs; 492  
35 (8.8%) had 5 LTCs; the remaining 230 (4.1%) had more than 5 LTCs. Of the remaining population,  
36 45,241 (13.6%) had one LTC and 10,992 (3.3%) had two LTCs.  
37  
38  
39  
40  
41  
42

43 A summary of LTC frequencies within the multimorbidity cohort is displayed in Table 1. The most  
44 common LTCs within this cohort were: DM (63.0%) and chronic pain (42.8%). In contrast, the most  
45 common of the included LTCs in the adult general population were: depression (8.4%), DM (5.4%)  
46 and morbid obesity (3.2%).  
47  
48  
49  
50  
51

52 The socio-demographic characteristics of the multimorbidity cohort are displayed in Table 2. Within  
53 the cohort, 33.9% were aged under 65 years (compared with 91.7% in the sample population);  
54 27.7% were of a 'Black' ethnicity (18.0% in the sample population) and 46.0% were born in the UK  
55 (45.2% in the sample population). The mean age for multimorbid patients in least and most deprived  
56  
57  
58  
59  
60

1  
2  
3 quintiles was 73.0 (standard deviation (SD), 13.5) and 69.3 (SD, 12.9) years, respectively; and for the  
4  
5 white, black and south Asian populations was 71.2 (SD, 13.3), 69.4 (SD, 14.3) and 71.9 (SD, 11.8)  
6  
7 years, respectively.  
8  
9

### 10 **Multimorbidity cohort socio-demographic determinants**

11  
12  
13 Socio-demographic determinants of the multimorbidity cohort are displayed in Table 3. Based on the  
14  
15 adjusted odds ratio (AOR) derived from the multilevel regression model, the strongest determinant  
16  
17 for multimorbidity was related to age. After adjustment for age, both social deprivation (the more  
18  
19 deprived quintiles) and ethnicity (Black and south Asian ethnicities) remained significant  
20  
21 determinants, albeit with much smaller odds ratios. The AOR for black and South Asian compared  
22  
23 with white ethnicity was 1.15 (95% CIs, 1.07, 1.23) and 1.19 (95% CIs, 1.07, 1.33), respectively; for  
24  
25 most compared to least deprived quintile, the AOR was 1.83 (95% CIs, 1.66, 2.02).  
26  
27  
28  
29

### 30 **Multimorbidity cohort risk factor determinants**

31  
32  
33 Addition of the three risk factors included in the study attenuated the odds ratios for multimorbidity  
34  
35 related to age (Table 4). Social deprivation remained a determinant of multimorbidity: for most  
36  
37 compared to least deprived quintile, the AOR was 1.56 (95% CIs, 1.41, 1.72). South Asian ethnicity  
38  
39 remained a significant determinant of multimorbidity: AOR 1.44 (95% CIs, 1.29, 1.61) but black  
40  
41 ethnicity was no longer a positive determinant: AOR 0.86 (95% CIs, 0.80, 0.92).  
42  
43  
44

45 The three risk factors were significant determinants of multimorbidity: hypertension, AOR 5.05 (95%  
46  
47 CIs, 4.69, 5.44); moderate obesity, AOR 3.41 (95% CIs, 3.21, 3.63); smoking, AOR 2.30 (95% CIs, 2.16,  
48  
49 2.45).  
50  
51

### 52 **Sensitivity analyses**

53  
54  
55 Re-analysis of the determinants of multimorbidity using regression modelling adjusted for clustering  
56  
57 at practice level resulted in similar adjusted odds ratios to those obtained in the primary analyses  
58  
59 (Table 5). We explored goodness-of-fit through derived pseudo-r<sup>2</sup> values for demographic  
60

1  
2  
3 determinants: pseudo- $r^2 = 0.22$ , and for risk factor adjusted determinants (hypertension, moderate  
4 obesity, smoking): pseudo- $r^2 = 0.32$ . The areas under the ROC curve for each model were 0.84 and  
5  
6 0.93, respectively (Supplementary file: Figures 1, 2).  
7  
8  
9

### 10 **Multimorbidity acquisition sequence**

11  
12  
13 Of the 5597 patients in the multimorbidity cohort, 5196 had three distinct dates of onset for each of  
14 their three or more component LTCs. The remaining 401 (7.2%) patients had identical dates of onset  
15 recorded for two or three of their first three LTCs and therefore could not be classified into a  
16 sequence. Alluvial plots were constructed displaying the acquisition sequence for LTCs and edited to  
17 display dominant flows of patients in each category. Figure 1 displays the three most common  
18 starting conditions and subsequent most commonly acquired second and third LTCs. The unedited  
19 alluvial plot displaying all patient flows is shown in the Supplementary file (Supplementary File,  
20 Figure 3).  
21  
22  
23  
24  
25  
26  
27  
28  
29  
30  
31

32 The alluvial plots illustrate that diabetes and depression were the most common starting conditions  
33 for patients with multimorbidity; diabetes was also relatively common as the second or third  
34 acquired LTC whereas depression was predominantly a first-onset LTC (Figure 1).  
35  
36  
37  
38

39 In the most deprived quintile, diabetes and depression were the most common starting conditions  
40 whereas in the least deprived quintile, diabetes and CHD were more common as starting conditions  
41 than depression (Figures 2, 3). Unedited alluvial plots comparing most and least deprived quintiles  
42 are shown in the Supplementary file (Supplementary File, Figures 4, 5).  
43  
44  
45  
46  
47  
48

49 Multimorbidity in the white ethnic group was dominated by depression as the starting condition,  
50 whereas in the black ethnic group diabetes was the most common starting condition, with  
51 depression and SMI also relatively common (Figures 4, 5). Relatively small numbers resulted in poor  
52 definition of the alluvial plot in the South Asian group and this figure is not presented. Unedited  
53  
54  
55  
56  
57  
58  
59  
60

1  
2  
3 alluvial plots comparing black and white ethnic groups are shown in the Supplementary file  
4  
5 (Supplementary File, Figures 6, 7).  
6  
7

8  
9 Multimorbidity in the under 65 year old cohort was dominated by depression as the starting  
10  
11 condition, with SMI also relatively common; in the  $\geq 65$  year old cohort, diabetes and CHD were the  
12  
13 most common starting conditions (Figures 6, 7).  
14

15  
16 Chronic pain appeared to be more common as a second or third acquired LTC but less common as a  
17  
18 first LTC. This sequence was apparent in the overall picture, in the pattern displayed by least and  
19  
20 most deprived quintiles, for black and white ethnicities and for younger and older age cohorts.  
21  
22

23  
24 Morbid obesity was among the more common starting conditions in the most deprived cohort and  
25  
26 younger age cohort. However, in other socio-demographic samples, morbid obesity was more  
27  
28 common as a second and third acquired LTC.  
29  
30  
31  
32

### 33 **DISCUSSION**

34  
35  
36 We report on multimorbidity using a definition originating from a health service commissioning  
37  
38 perspective, consisting of three or more of 12 LTCs selected because of likely high impact upon  
39  
40 health service and social care utilisation. In total, 1.7% of the adult population in our study sample  
41  
42 had multimorbidity according to these narrowly defined criteria. Diabetes and chronic pain were the  
43  
44 most prevalent LTCs within this cohort. Independent of age, both ethnicity and social deprivation  
45  
46 were significant determinants of multimorbidity. However, the cardiovascular risk factors of  
47  
48 hypertension, obesity and smoking were more strongly associated with multimorbidity than social  
49  
50 deprivation or ethnicity.  
51  
52

53  
54  
55 The acquisition sequence of multimorbidity differed substantially according to age, ethnicity and  
56  
57 social deprivation. Diabetes and depression were the most common starting conditions overall.  
58

59  
60 Diabetes as a starting condition was notably more common in the older and black ethnic group.



1  
2  
3 Depression as a starting condition was notably more common in patients who were younger, more  
4 deprived and in the white ethnic group. Differences in acquisition sequence between most and least  
5 deprived areas and white and black ethnicities (Figures 2 - 5) are unlikely to have been strongly  
6  
7 influenced by age differences since mean age was similar for each of these cohorts.  
8  
9

### 12 **Strengths and Limitations**

13  
14  
15 Data access was a limitation to this analysis. We were only able to obtain data from one of the two  
16 boroughs adopting this approach to multimorbidity, the other lacked a data extraction system  
17 preventing us from analysing large datasets of patient-level data. Had we gained access to the data,  
18 this would have approximately doubled our sample size and enabled further analysis of  
19 multimorbidity in deprived, multi-ethnic populations. This difficulty in accessing anonymised data  
20 hampers the analysis of patient-level data in many areas of the UK (15). Data coding constrains the  
21 analysis of primary care data and we were only able to study the association of multimorbidity with  
22 a limited range of risk factors while other known risk factors such as exercise and diet could not be  
23 captured. We aimed to display the acquisition sequence of LTCs using alluvial plots. However, these  
24 plots do not readily display time data resulting in a lack of clarity in the rate of progression of  
25 multimorbidity. A time-to-event analysis is required for identifying those patients who progress  
26 rapidly from first LTC into multimorbidity, which is the subject of further study. Similarly, the  
27 acquisition sequence could not be determined for a small minority of patients with identical LTC  
28 date-of-onset recording by GPs whereas in reality, it is unlikely that the LTC onset dates were  
29 simultaneous. Furthermore, as with all studies based on primary care data, there may be coding  
30 anomalies which introduce bias into the estimates of LTC prevalence. QOF coding criteria were used  
31 for 10 of the included LTCs, standardising the definition. However, the prevalence of conditions such  
32 as depression may be underestimated using QOF criteria (16). For the two LTCs not included in the  
33 QOF, the definition is dependent on GP coding. Thus 'morbid obesity' was only included in our study  
34 if there was a BMI recording which may have resulted in an under-estimate of prevalence. 'Chronic  
35  
36  
37  
38  
39  
40  
41  
42  
43  
44  
45  
46  
47  
48  
49  
50  
51  
52  
53  
54  
55  
56  
57  
58  
59  
60

1  
2  
3 pain' was defined based on medication consumption whereas many patients with chronic pain may  
4  
5 have sought alternatives to analgesic medication resulting in an underestimate of prevalence;  
6  
7 conversely, our inclusion criteria of 'two or more prescriptions over the preceding year' may have  
8  
9 resulted in an overestimate of prevalence, with some patients recovering from chronic pain during  
10  
11 the course of the year. In common with other observational studies, significant associations between  
12  
13 multimorbidity and socio-demographic or risk factor determinants may imply, but cannot prove,  
14  
15 causality. Whilst interventional studies are required to obtain stronger evidence of causality, causal  
16  
17 inference may be derived by time series analyses and further study of potential confounding and  
18  
19 residual variance. Finally, the richness of locally based data covering a whole borough with unique  
20  
21 socio-demographic characteristics has to be offset against possible loss of generalisability to other  
22  
23 areas with very different social deprivation and ethnicity characteristics.  
24  
25  
26  
27

### 28 **Comparison with the literature**

29  
30  
31 Our cross-sectional data, although conducted in a deprived, multi-ethnic population, are similar to  
32  
33 the findings of others reporting on increased multimorbidity prevalence associated with age, social  
34  
35 deprivation and ethnic minority status (17). Comparison with other multimorbidity studies is difficult  
36  
37 because of the highly restricted definition of multimorbidity used in the current study. Nevertheless,  
38  
39 other studies have reported the high prevalence of both diabetes and depression in multimorbidity  
40  
41 cohorts (3, 17). A higher prevalence of mental health and physical health LTC combinations has been  
42  
43 noted in deprived areas, although in our own study we did not conduct an analysis to identify  
44  
45 specific LTC combinations (18). Certain conditions have been found to be more prevalent in deprived  
46  
47 communities, also contributing to higher prevalence of multimorbidity in these areas, such as  
48  
49 depression and addiction issues in younger deprived populations (19), or more generally,  
50  
51 depression, drugs, anxiety, dyspepsia, chronic pain, CHD, DM (20). These findings are aligned to our  
52  
53 own reporting of high proportions of multimorbid patients in deprived areas with depression and  
54  
55 diabetes. The known influence of population age profiles on the demography of multimorbidity (19)  
56  
57  
58  
59  
60

1  
2  
3 is illustrated by our finding of markedly differing alluvial plot profiles describing multimorbidity  
4 acquisition in a younger cohort dominated by mental health related conditions (Figure 6) and an  
5  
6 older cohort dominated by CHD and DM (Figure 7). The inner city population in our study is  
7  
8 characterised by a much younger overall age profile compared with the national population: 8% of  
9  
10 the population of Lambeth is aged 65 years or more compared to a mean of 18% in England (21).  
11  
12 Added to this, the most socially deprived and black ethnic minority groups in our sample were  
13  
14 somewhat younger. Both factors are likely to have reduced the overall study prevalence of  
15  
16 conditions associated with ageing such as diabetes and CHD. Many multimorbidity studies do not  
17  
18 include morbid obesity within their definition (3, 17); we found morbid obesity was particularly  
19  
20 associated with social deprivation.  
21  
22

23  
24  
25 Several publications have reported on combinations and clusters of LTCs but few longitudinal  
26  
27 analyses have been reported (22). One study from Australia reported the order of appearance for  
28  
29 eight LTCs, reporting in detail for asthma and mood related disorders, the two LTCs most strongly  
30  
31 associated with the risk of developing a second LTC. For those with baseline asthma, there was a  
32  
33 higher subsequent risk of developing COPD and hypercholesterolaemia; for those with baseline  
34  
35 mood disorders, there risk of subsequent asthma, diabetes and other mental disorders was  
36  
37 increased (23). In a study of cardiometabolic conditions in Australia, nearly one-quarter of women  
38  
39 initially diagnosed with stroke subsequently progressed to other conditions which was a much larger  
40  
41 proportion progressing to other conditions than in those initially diagnosed with diabetes (9.9%) or  
42  
43 heart disease (11.4%) (24). A further US study explored the acquisition sequence of 20 LTCs  
44  
45 describing dyads and triads of conditions and reporting, for example, that the most common triad  
46  
47 sequence in 20-39 year olds was depression, asthma and substance misuse whereas in 50-59 year  
48  
49 olds it was hyperlipidaemia, hypertension and diabetes (25). They concluded that combinations of  
50  
51 LTCs vary extensively by age and sex. Our own findings confirm variation by age and sex, with  
52  
53 ethnicity adding to the pattern of variation. Some authors have suggested that the study of  
54  
55 acquisition sequence may imply potential interventions to prevent, minimise or delay progression  
56  
57  
58  
59  
60

1  
2  
3 toward multimorbidity (23). Our findings that three cardiovascular risk factors are more strongly  
4 associated with multimorbidity than deprivation and ethnicity, suggest that interventions to reduce  
5 the impact of these risk factors may contribute to a reduction in the prevalence of multimorbidity.  
6  
7 The control of hypertension, smoking and obesity are often perceived in terms of primary  
8 cardiovascular disease prevention or of secondary prevention of single LTCs but may also be  
9  
10 conceptualised in terms of multimorbidity prevention. However, a focus on risk factors should not  
11 detract from 'the causes of the causes', since social conditions themselves generate causal pathways  
12 leading from socio-economic determinants to risk behaviours (26) and interventions which address  
13 health behaviours while failing to engage in social determinants may paradoxically result in  
14 increased health inequalities (27).  
15  
16  
17  
18  
19  
20  
21  
22  
23  
24  
25  
26  
27  
28

## 29 **CONCLUSION**

30  
31 We have confirmed the role of age, social deprivation and ethnicity as determinants of  
32 multimorbidity in an inner city multi-ethnic population and have extended previous findings  
33 demonstrating the way in which the acquisition sequence of multimorbidity is patterned by these  
34 determinants. Three cardiovascular risk factors, hypertension, obesity and smoking were stronger  
35 determinants of multimorbidity than either deprivation or ethnicity. The strength of these risk  
36 factors as determinants suggests interventions which may be effective in reducing the prevalence,  
37 delaying the onset or slowing the progression of multimorbidity.  
38  
39  
40  
41  
42  
43  
44  
45  
46  
47  
48  
49  
50  
51  
52  
53  
54  
55  
56  
57  
58  
59  
60

1  
2  
3 **Contributors:** MA, HD and MW contributed to the idea and design of the study. SD, DW and JC led  
4 on data extraction and preparation. Statistical analysis was conducted by MA and HD. MA produced  
5 the first draft of the paper; all co-authors contributed and approved the final draft. MA is the  
6 guarantor. The corresponding author attests that all listed authors meet authorship criteria and that  
7 no others meeting the criteria have been omitted.  
8  
9

10  
11  
12 **Funding:** This work was supported by the Guy's and St Thomas' Charity with a grant awarded  
13 November 2017. The views expressed are those of the authors and not necessarily those of the  
14 funders. The findings presented are independent from the funders who have had no role in data  
15 collection, data analysis or writing of the paper.  
16  
17

18  
19 **Competing interests:** All authors have completed the ICMJE uniform disclosure form at  
20 [www.icmje.org/coi\\_disclosure.pdf](http://www.icmje.org/coi_disclosure.pdf) and declare: no support from any organisation for the submitted  
21 work; no financial relationships with any organisations that might have an interest in the submitted  
22 work in the previous three years; no other relationships or activities that could appear to have  
23 influenced the submitted work.  
24  
25

### 26 **Ethical approval**

27  
28 All data were extracted under the terms of a signed Data Sharing Agreement (DSA) with each  
29 practice and with project-specific approval following submission of a Data Privacy Impact  
30 Assessment (DPIA), approved by Lambeth Clinical Commissioning Group (CCG) on 2/11/17.  
31 Information Governance approval required 'low number suppression', ensuring that data could not  
32 be displayed if the patient number was 10 or less in any given category; in these circumstances, data  
33 reporting would state: '≤10 patients'. Separate Ethical Committee approval was not required (Health  
34 Research Authority, personal correspondence, 29/9/17) since all data were fully anonymised for the  
35 purposes of research access, and all Patient Identifiable Data (PID) had been removed.  
36  
37

38  
39 **Data sharing:** No additional data available.  
40  
41  
42  
43  
44  
45  
46  
47  
48  
49  
50  
51  
52  
53  
54  
55  
56  
57  
58  
59  
60

## REFERENCES:

1. Palladino R, Tayu Lee J, Ashworth M, *et al.* Associations between multimorbidity, healthcare utilisation and health status: evidence from 16 European countries. *Age Ageing* 2016;45:431-5. <https://dx.doi.org/10.11606%2FS1518-8787.2018052000639>
2. Fortin M, Stewart M, Poitras ME, *et al.* A systematic review of prevalence studies on multimorbidity: toward a more uniform methodology. *Ann Fam Med* 2012;10:142-51. <https://doi.org/10.1370/afm.1337>
3. Cassell A, Edwards D, Harshfield A, *et al.* The epidemiology of multimorbidity in primary care: a retrospective cohort study. *Br J Gen Pract* 2018;68:e245-e51. <https://doi.org/10.3399/bjgp18X695465>
4. Hanlon P, Nicholl BI, Jani BD, *et al.* Frailty and pre-frailty in middle-aged and older adults and its association with multimorbidity and mortality: a prospective analysis of 493 737 UK Biobank participants. *Lancet Public Health* 2018;3:e323-e32. [https://doi.org/10.1016/S2468-2667\(18\)30091-4](https://doi.org/10.1016/S2468-2667(18)30091-4)
5. Billings J, Blunt I, Steventon A, *et al.* Development of a predictive model to identify inpatients at risk of re-admission within 30 days of discharge (PARR-30). *BMJ Open* 2012;2. <http://dx.doi.org/10.1136/bmjopen-2012-001667>
6. Huntley AL, Johnson R, Purdy S, *et al.* Measures of multimorbidity and morbidity burden for use in primary care and community settings: a systematic review and guide. *Ann Fam Med.* 2012;10:134-41. <https://doi.org/10.1370/afm.1363>
7. Roland M, Abel G. Reducing emergency admissions: are we on the right track? *Br Med J* 2012;345:e6017. <https://doi.org/10.1136/bmj.e6017>
8. From one to many. Exploring people's progression to multiple long-term conditions in an urban environment. Guy's and St Thomas' Charity. London, 2018. [https://www.gsttcharity.org.uk/sites/default/files/GSTTC\\_MLTC\\_Report\\_2018.pdf](https://www.gsttcharity.org.uk/sites/default/files/GSTTC_MLTC_Report_2018.pdf).
9. Quality and Outcomes Framework (QOF) business rules v 38 2017-2018 October code release.NHS Digital. Leeds, 2018. <https://digital.nhs.uk/data-and-information/data-collections-and-data-sets/data-collections/quality-and-outcomes-framework-qof/quality-and-outcome-framework-qof-business-rules/quality-and-outcomes-framework-qof-business-rules-v-38-2017-2018-october-code-release>.
10. Joint Formulary Committee: British National Formulary (online). London: BMJ Group and Pharmaceutical Press,<http://www.medicinescomplete.com>
11. English Indices of Deprivation 2015 - LSOA Level. Ministry of Housing, Communities and Local Government. London, 2018. <https://data.gov.uk/dataset/8f601edb-6974-417e-9c9d-85832dd2bbf2/english-indices-of-deprivation-2015-lsoa-level>
12. Lambeth, State of the borough, 2016. Lambeth Council. London, 2017. <https://www.lambeth.gov.uk/sites/default/files/State%20of%20Borough%202016%20-%20v3.pdf>
13. Statacorp. Stata Statistical Software: Release 14 2015. Available from: <http://www.stata.com/>
14. Alluvial Diagrams in ggplot2. Brunson, JC, 2018. <https://cran.r-project.org/web/packages/ggalluvial/vignettes/ggalluvial.html>
15. Harwich E, Lasko-Skinner R. Making NHS data work for everyone. Reform. London, 2018. [https://reform.uk/sites/default/files/2018-12/Making%20NHS%20data%20work%20for%20everyone%20WEB\\_1.pdf](https://reform.uk/sites/default/files/2018-12/Making%20NHS%20data%20work%20for%20everyone%20WEB_1.pdf)
16. Kendrick T, Stuart B, Newell C, *et al.* Changes in rates of recorded depression in English primary care 2003-2013: Time trend analyses of effects of the economic recession, and the GP contract quality outcomes framework (QOF). *J Affect Disord* 2015;180:68-78. <https://doi.org/10.1016/j.jad.2015.03.040>
17. Barnett K, Mercer SW, Norbury M, *et al.* Epidemiology of multimorbidity and implications for health care, research, and medical education: a cross-sectional study. *Lancet* 2012;380:37-43. [https://doi.org/10.1016/S0140-6736\(12\)60240-2](https://doi.org/10.1016/S0140-6736(12)60240-2)

- 1  
2  
3 18. McLean G, Guthrie B, Mercer SW, *et al*. General practice funding underpins the persistence of  
4 the inverse care law: cross-sectional study in Scotland. *Br J Gen Pract* 2015;65:e799-805.  
5 <https://doi.org/10.3399/bjgp15X687829>  
6  
7 19. Leiser S, Deruaz-Luyet A, N'Goran AA, *et al*. Determinants associated with deprivation in  
8 multimorbid patients in primary care-A cross-sectional study in Switzerland. *PLoS One*  
9 2017;12:e0181534. <https://doi.org/10.1371/journal.pone.0181534>  
10  
11 20. McLean G, Gunn J, Wyke S, *et al*. The influence of socioeconomic deprivation on multimorbidity  
12 at different ages: a cross-sectional study. *Br J Gen Pract* 2014;64:e440-7.  
13 <https://doi.org/10.3399/bjgp14X680545>  
14  
15 21. Lambeth. Demographic factsheet, May 2015. Lambeth & Southwark's Public Health Intelligence  
16 Team, 2015. <https://www.lambeth.gov.uk/sites/default/files/ssh-lambeth-demography-2015.pdf>  
17  
18 22. Multimorbidity: a priority for global health research. Academy of Medical Sciences. London,  
19 2018. <https://acmedsci.ac.uk/file-download/82222577>  
20  
21 23. Ruel G, Levesque JF, Stocks N, *et al*. Understanding the evolution of multimorbidity: evidences  
22 from the North West Adelaide Health Longitudinal Study (NWAHS). *PLoS One* 2014;9:e96291.  
23 <https://doi.org/10.1371/journal.pone.0096291>  
24  
25 24. Xu X, Mishra GD, Dobson AJ, *et al*. Progression of diabetes, heart disease, and stroke  
26 multimorbidity in middle-aged women: A 20-year cohort study. *PLoS Med* 2018;15:e1002516.  
27 <https://doi.org/10.1371/journal.pmed.1002516>  
28  
29 25. St Sauver JL, Boyd CM, Grossardt BR, *et al*. Risk of developing multimorbidity across all ages in an  
30 historical cohort study: differences by sex and ethnicity. *BMJ Open* 2015;5:e006413.  
31 <https://doi.org/10.1136/bmjopen-2014-006413>  
32  
33 26. Ferraro KF, Schaffer MH, Wilkinson LR. Childhood Disadvantage and Health Problems in Middle  
34 and Later Life: Early Imprints on Physical Health? *Am Sociol Rev* 2016;81:107-133.  
35 <https://doi.org/10.1177/0003122415619617>  
36  
37 27. Link BG, Phelan J. Social Conditions As Fundamental Causes of Disease. *J Health Soc Behavior*  
38 1995;(Extra Issue): 80-94. DOI: 10.2307/2626958  
39  
40  
41  
42  
43  
44  
45  
46  
47  
48  
49  
50  
51  
52  
53  
54  
55  
56  
57  
58  
59  
60

**Table 1.** Frequencies of Long Term Conditions included in the multimorbidity cohort (n = 5597 patients) compared with the remainder of the registered population and with the general population aged ≥18 years.

| Long Term Condition | Multimorbidity cohort:<br>frequency (valid %)<br>N = 5597 | Non-Multimorbidity cohort:<br>frequency (valid %)<br>N = 326,756 | Population values:<br>frequency (valid %)<br>N = 332,353 |
|---------------------|-----------------------------------------------------------|------------------------------------------------------------------|----------------------------------------------------------|
| DM                  | 3525 (63.0%)                                              | 14,405 (4.4%)                                                    | 17,930 (5.4%)                                            |
| Chronic Pain        | 2397 (42.8%)                                              | 5813 (1.8%)                                                      | 8210 (2.5%)                                              |
| CKD                 | 2101 (37.5%)                                              | 3470 (1.1%)                                                      | 5571 (1.7%)                                              |
| CHD                 | 2099 (37.5%)                                              | 2668 (0.8%)                                                      | 4767 (1.4%)                                              |
| Depression          | 2086 (37.3%)                                              | 25,877 (7.9%)                                                    | 27,963 (8.4%)                                            |
| Morbid Obesity      | 1653 (29.5%)                                              | 8883 (2.7%)                                                      | 10,486 (3.2%)                                            |
| AF                  | 1254 (22.4%)                                              | 1493 (0.5%)                                                      | 2747 (0.8%)                                              |
| COPD                | 1247 (22.3%)                                              | 2387 (0.7%)                                                      | 3634 (1.1%)                                              |
| Heart Failure       | 1186 (21.2%)                                              | 544 (0.2%)                                                       | 1730 (0.5%)                                              |
| Stroke              | 1095 (19.6%)                                              | 1571 (0.5%)                                                      | 2666 (0.8%)                                              |
| SMI                 | 692 (12.4%)                                               | 4099 (1.3%)                                                      | 4791 (1.4%)                                              |
| Dementia            | 616 (11.0%)                                               | 738 (0.2%)                                                       | 1354 (0.4%)                                              |

**Table 2.** Socio-demographic characteristics of multimorbidity cohort, compared with remainder of registered population aged ≥18 years.

| Demographic characteristic | Multimorbidity cohort:<br>frequency (valid %)<br>N = 5597 | Non-Multimorbidity cohort:<br>frequency (valid %)<br>N = 326,756 |
|----------------------------|-----------------------------------------------------------|------------------------------------------------------------------|
| Female gender              | 3042 (54.4%)                                              | 161,445 (49.4%)                                                  |
| Age <65 years              | 1899 (33.9%)                                              | 299,742 (91.7%)                                                  |
| Age ≥65-74 years           | 1249 (22.3%)                                              | 15,992 (4.9%)                                                    |
| Age ≥75-84 years           | 1479 (26.4%)                                              | 8038 (2.5%)                                                      |
| Age ≥85 years              | 970 (17.3%)                                               | 2884 (0.9%)                                                      |
| White                      | 3022 (54.0%)                                              | 179,859 (55.0%)                                                  |
| Black                      | 1553 (27.7%)                                              | 58,939 (18.0%)                                                   |



|                                                                   |              |                 |
|-------------------------------------------------------------------|--------------|-----------------|
| South Asian                                                       | 469 (8.4%)   | 22,323 (6.8%)   |
| Mixed                                                             | 197 (3.5%)   | 15,177 (4.6%)   |
| Other                                                             | 100 (1.8%)   | 9804 (3.0%)     |
| Unknown                                                           | 256 (4.6%)   | 40,654 (12.4%)  |
| Country of origin: UK*                                            | 1413 (46.0%) | 69,675 (45.2%)  |
| Language preference:<br>English*                                  | 3755 (84.0%) | 240,287 (73.8%) |
| Social deprivation:<br>1 <sup>st</sup> quintile (most deprived)*  | 1500 (26.8%) | 63,374 (19.4%)  |
| Social deprivation:<br>2 <sup>nd</sup> quintile*                  | 1232 (22.0%) | 63,073 (19.3%)  |
| Social deprivation:<br>3 <sup>rd</sup> quintile*                  | 995 (17.8%)  | 66,409 (20.3%)  |
| Social deprivation:<br>4 <sup>th</sup> quintile*                  | 1013 (18.1%) | 66,334 (20.3%)  |
| Social deprivation:<br>5 <sup>th</sup> quintile (least deprived)* | 828 (14.8%)  | 64,306 (19.7%)  |

\*missing data with reduction in denominator number.

**Table 3.** Socio-demographic determinants of the multimorbidity cohort: adjusted odds ratios derived from mixed effects multi-level logistic regression modelling.

| Demographic characteristic                                    | Adjusted odds ratio (AOR) | 95% confidence intervals for AOR |
|---------------------------------------------------------------|---------------------------|----------------------------------|
| Female gender                                                 | 1.05                      | 0.99, 1.11                       |
| Age <65 years                                                 | (reference group)         |                                  |
| Age ≥65-74 years                                              | 11.81                     | 10.96, 12.72                     |
| Age ≥75-84 years                                              | 27.14                     | 25.22, 29.20                     |
| Age ≥85 years                                                 | 48.70                     | 44.60, 53.18                     |
| White                                                         | (reference group)         |                                  |
| Black                                                         | 1.15                      | 1.07, 1.23                       |
| South Asian                                                   | 1.19                      | 1.07, 1.33                       |
| Mixed                                                         | 0.96                      | 0.83, 1.12                       |
| Other                                                         | 0.76                      | 0.62, 0.93                       |
| Unknown                                                       | 0.44                      | 0.38, 0.50                       |
| Social deprivation: 1 <sup>st</sup> quintile (most deprived)  | 1.83                      | 1.66, 2.02                       |
| Social deprivation: 2 <sup>nd</sup> quintile                  | 1.58                      | 1.43, 1.75                       |
| Social deprivation: 3 <sup>rd</sup> quintile                  | 1.27                      | 1.15, 1.40                       |
| Social deprivation: 4 <sup>th</sup> quintile                  | 1.21                      | 1.10, 1.33                       |
| Social deprivation: 5 <sup>th</sup> quintile (least deprived) | (reference group)         |                                  |

**Table 4.** Socio-demographic determinants of the multimorbidity cohort: odds ratios derived from mixed effects multi-level logistic regression modelling with addition of three risk factors: Hypertension, Obesity (moderate), Smoking (ever).

| Demographic characteristic                                       | Adjusted odds ratio (AOR) | 95% confidence intervals for AOR |
|------------------------------------------------------------------|---------------------------|----------------------------------|
| Female gender                                                    | 1.10                      | 1.01, 1.19                       |
| Age <65 years                                                    | (reference group)         |                                  |
| Age ≥65-74 years                                                 | 4.01                      | 3.69, 4.36                       |
| Age ≥75-84 years                                                 | 8.12                      | 7.46, 8.83                       |
| Age ≥85 years                                                    | 15.71                     | 14.20, 17.38                     |
| White                                                            | (reference group)         |                                  |
| Black                                                            | 0.86                      | 0.80, 0.92                       |
| South Asian                                                      | 1.44                      | 1.29, 1.61                       |
| Mixed                                                            | 0.95                      | 0.81, 1.11                       |
| Other                                                            | 0.83                      | 0.67, 1.03                       |
| Unknown                                                          | 0.60                      | 0.52, 0.69                       |
| Social deprivation:<br>1 <sup>st</sup> quintile (most deprived)  | 1.56                      | 1.41, 1.72                       |
| Social deprivation:<br>2 <sup>nd</sup> quintile                  | 1.35                      | 1.22, 1.50                       |
| Social deprivation:<br>3 <sup>rd</sup> quintile                  | 1.18                      | 1.06, 1.31                       |
| Social deprivation:<br>4 <sup>th</sup> quintile                  | 1.18                      | 1.06, 1.30                       |
| Social deprivation:<br>5 <sup>th</sup> quintile (least deprived) | (reference group)         |                                  |
| Hypertension register                                            | 5.05                      | 4.69, 5.44                       |
| Moderate obesity                                                 | 3.41                      | 3.21, 3.63                       |
| Smoker (ever)                                                    | 2.30                      | 2.16, 2.45                       |

**Table 5.** Socio-demographic determinants of the multimorbidity cohort: odds ratios derived from mixed effects logistic regression modelling adjusted for clustering at practice level.

| Demographic characteristic                                    | Adjusted odds ratio (AOR) | 95% confidence intervals for AOR |
|---------------------------------------------------------------|---------------------------|----------------------------------|
| Female gender                                                 | 1.05                      | 0.97, 1.13                       |
| Age <65 years                                                 | (reference group)         |                                  |
| Age ≥65-74 years                                              | 12.08                     | 10.53, 13.86                     |
| Age ≥75-84 years                                              | 27.74                     | 24.28, 31.71                     |
| Age ≥85 years                                                 | 49.84                     | 43.00, 57.78                     |
| White                                                         | (reference group)         |                                  |
| Black                                                         | 1.19                      | 1.06, 1.33                       |
| South Asian                                                   | 1.16                      | 1.00, 1.34                       |
| Mixed                                                         | 0.98                      | 0.81, 1.20                       |
| Other                                                         | 0.77                      | 0.62, 0.96                       |
| Unknown                                                       | 0.44                      | 0.36, 0.55                       |
| Social deprivation: 1 <sup>st</sup> quintile (most deprived)  | 1.96                      | 1.69, 2.26                       |
| Social deprivation: 2 <sup>nd</sup> quintile                  | 1.66                      | 1.43, 1.92                       |
| Social deprivation: 3 <sup>rd</sup> quintile                  | 1.31                      | 1.13, 1.51                       |
| Social deprivation: 4 <sup>th</sup> quintile                  | 1.24                      | 1.09, 1.42                       |
| Social deprivation: 5 <sup>th</sup> quintile (least deprived) | (reference group)         |                                  |

## Captions and Legends to Figures:

**Figures 1 - 7 display edited alluvial plots showing dominant patient pathways from acquisition of first to second and third Long Term Conditions.**

### Legend for all Figures:

Long Term Condition label abbreviations (n = 12): CHD = Coronary Heart Disease; STRK = Stroke; AF = Atrial Fibrillation; HF = Heart Failure; DM = Diabetes; CKD = Chronic Kidney Disease; MOBES = Morbid Obesity; Dep = Depression; SMI = Serious Mental Illness; DEM = Dementia; COPD = Chronic Obstructive Pulmonary Disease; CP = Chronic Pain.

**Figure 1:** Acquisition sequence of Long Term Conditions; dominant pathways displayed with patient flows  $\geq 35$  (n = 769).

**Figure 2:** Most deprived quintile: dominant pathways displayed with patient flows  $\geq 13$  (n = 145).

**Figure 3:** Least deprived quintile: dominant pathways displayed with patient flows  $\geq 8$  (n = 89).

**Figure 4:** 'White' ethnic group: dominant pathways displayed with patient flows  $\geq 18$  (n = 287)

**Figure 5:** 'Black' ethnic group: dominant pathways displayed with patient flows  $\geq 15$  (n = 227)

**Figure 6:** Age under 65 years: dominant pathways displayed with patient flows  $\geq 25$  (n = 343).

**Figure 7:** Age 65 years and over: dominant pathways displayed with patient flows  $\geq 20$  (n = 536).

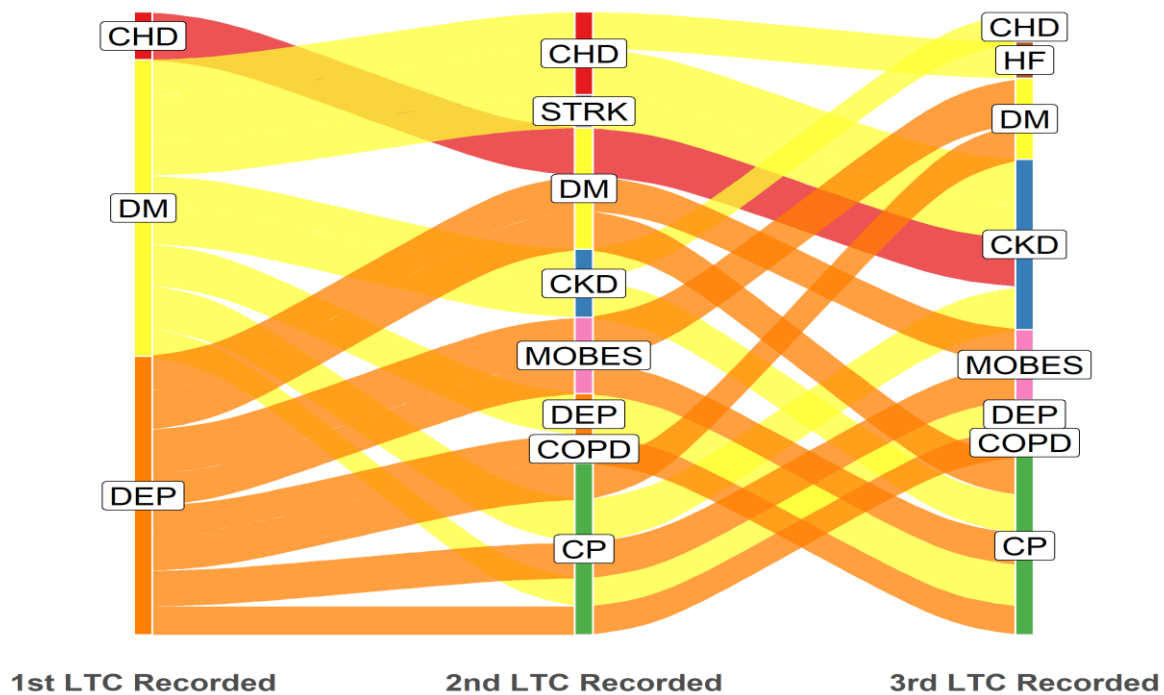

For review only

1  
2  
3  
4  
5  
6  
7  
8  
9  
10  
11  
12  
13  
14  
15  
16  
17  
18  
19  
20  
21  
22  
23  
24  
25  
26  
27  
28  
29  
30  
31  
32  
33  
34  
35  
36  
37  
38  
39  
40  
41  
42  
43  
44  
45  
46  
47  
48  
49  
50  
51  
52  
53  
54  
55  
56  
57  
58  
59  
60

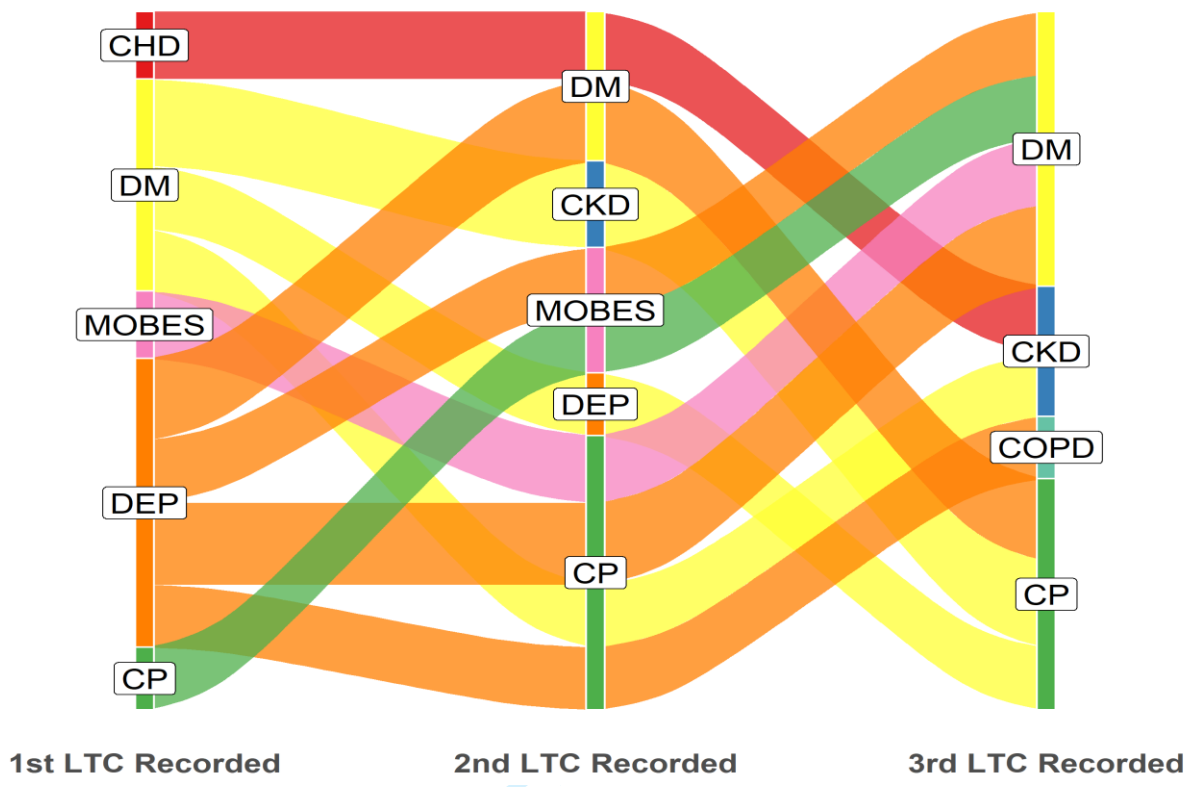

review only

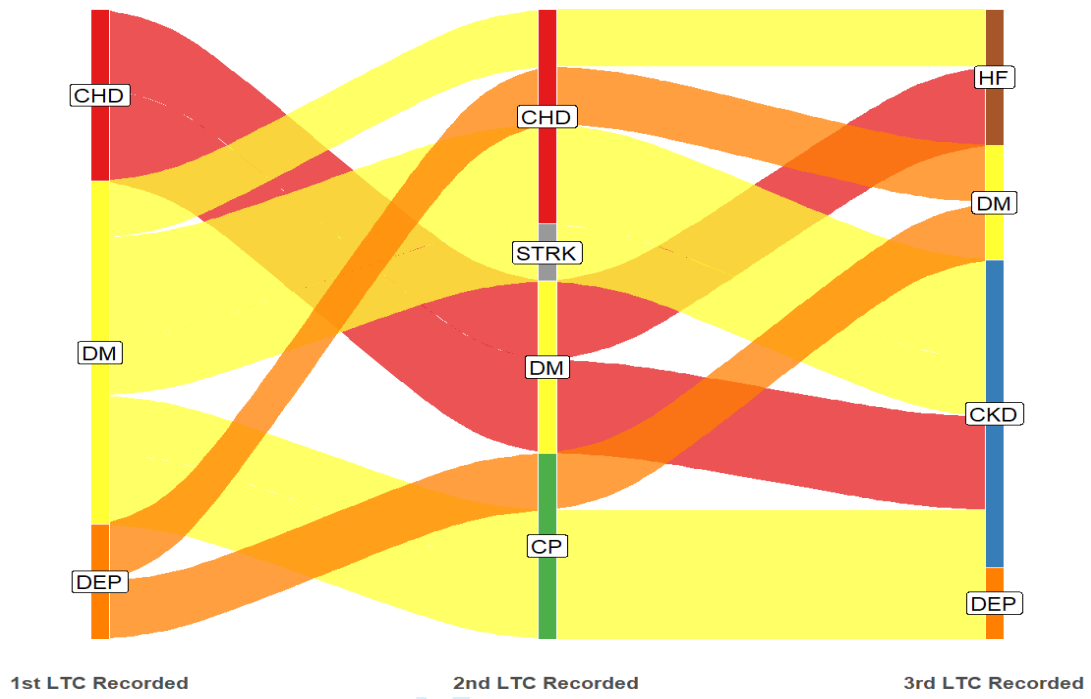

For peer review only

1  
2  
3  
4  
5  
6  
7  
8  
9  
10  
11  
12  
13  
14  
15  
16  
17  
18  
19  
20  
21  
22  
23  
24  
25  
26  
27  
28  
29  
30  
31  
32  
33  
34  
35  
36  
37  
38  
39  
40  
41  
42  
43  
44  
45  
46  
47  
48  
49  
50  
51  
52  
53  
54  
55  
56  
57  
58  
59  
60



1  
2  
3  
4  
5  
6  
7  
8  
9  
10  
11  
12  
13  
14  
15  
16  
17  
18  
19  
20  
21  
22  
23  
24  
25  
26  
27  
28  
29  
30  
31  
32  
33  
34  
35  
36  
37  
38  
39  
40  
41  
42  
43  
44  
45  
46  
47  
48  
49  
50  
51  
52  
53  
54  
55  
56  
57  
58  
59  
60

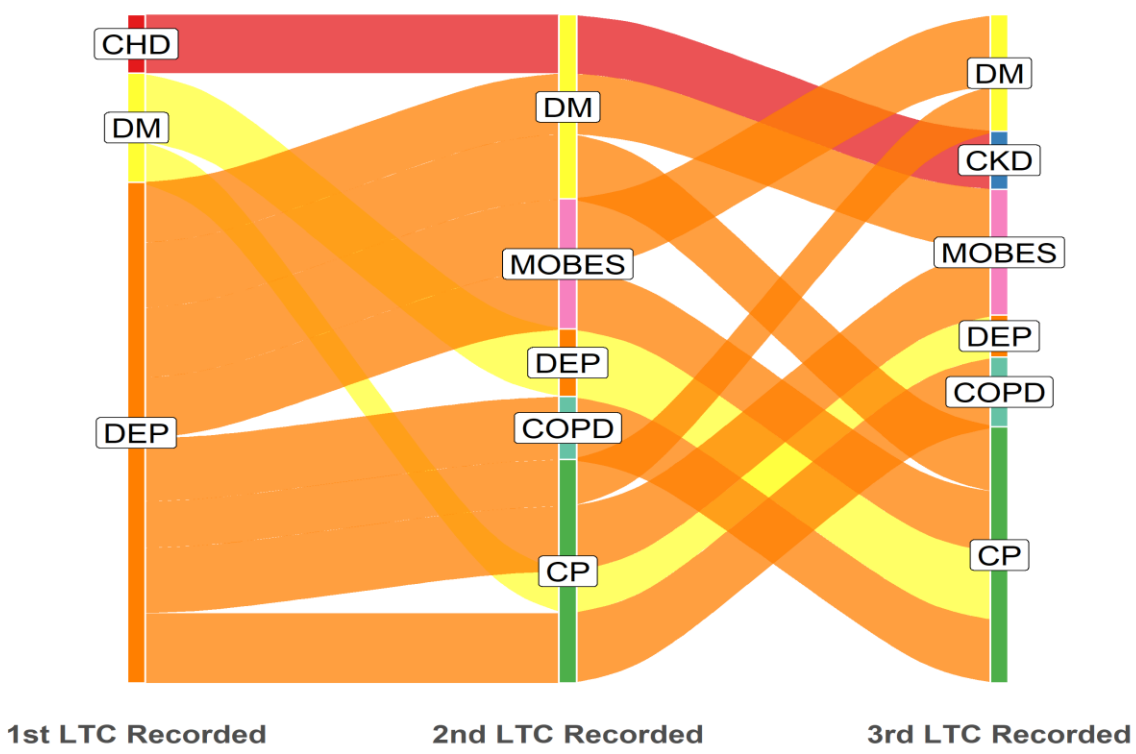

review only

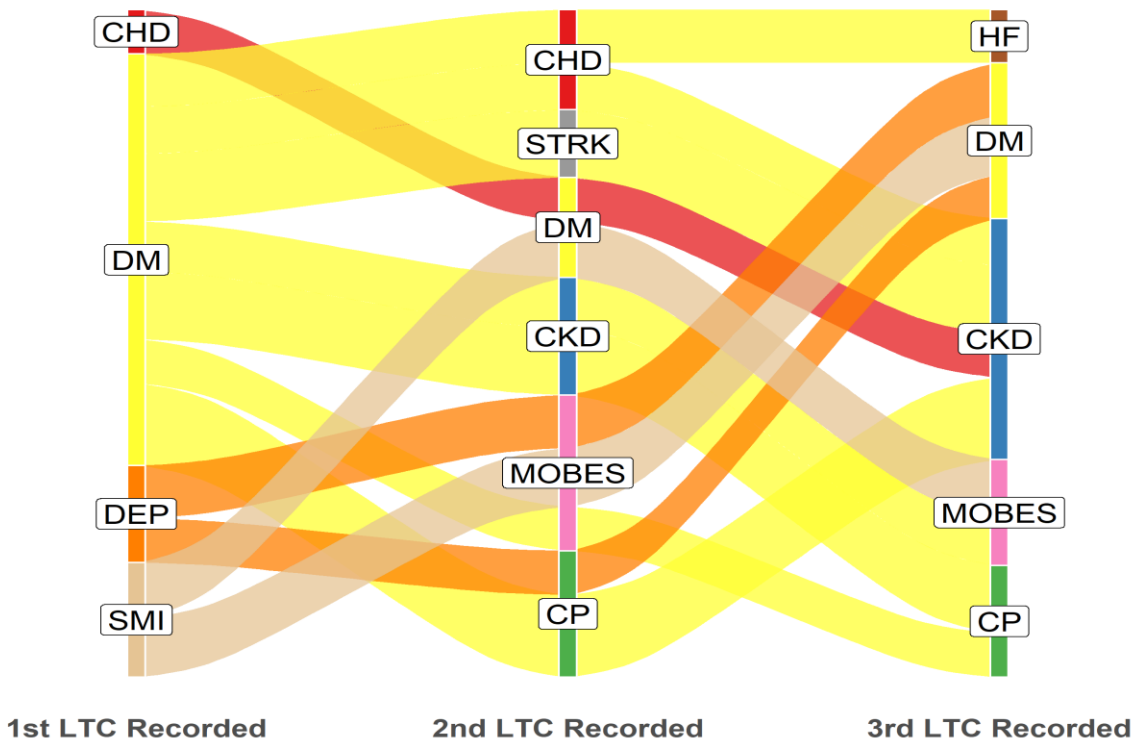

1  
2  
3  
4  
5  
6  
7  
8  
9  
10  
11  
12  
13  
14  
15  
16  
17  
18  
19  
20  
21  
22  
23  
24  
25  
26  
27  
28  
29  
30  
31  
32  
33  
34  
35  
36  
37  
38  
39  
40  
41  
42  
43  
44  
45  
46  
47  
48  
49  
50  
51  
52  
53  
54  
55  
56  
57  
58  
59  
60

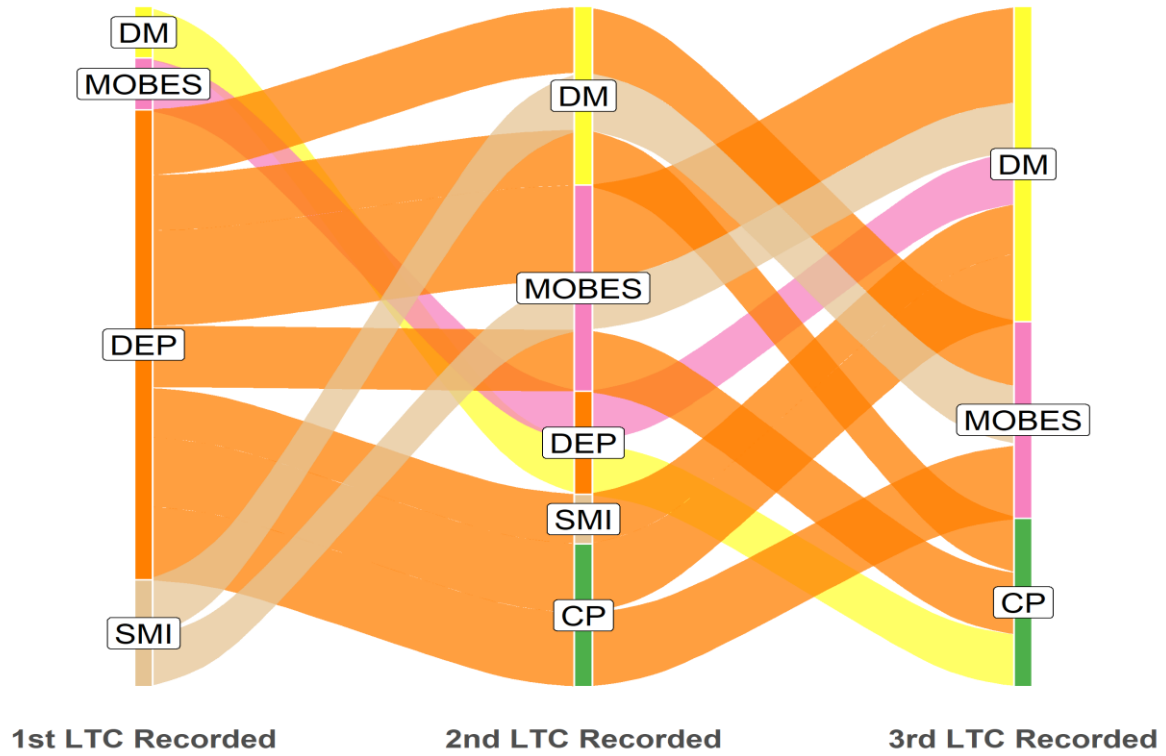

1st LTC Recorded

2nd LTC Recorded

3rd LTC Recorded

For review only

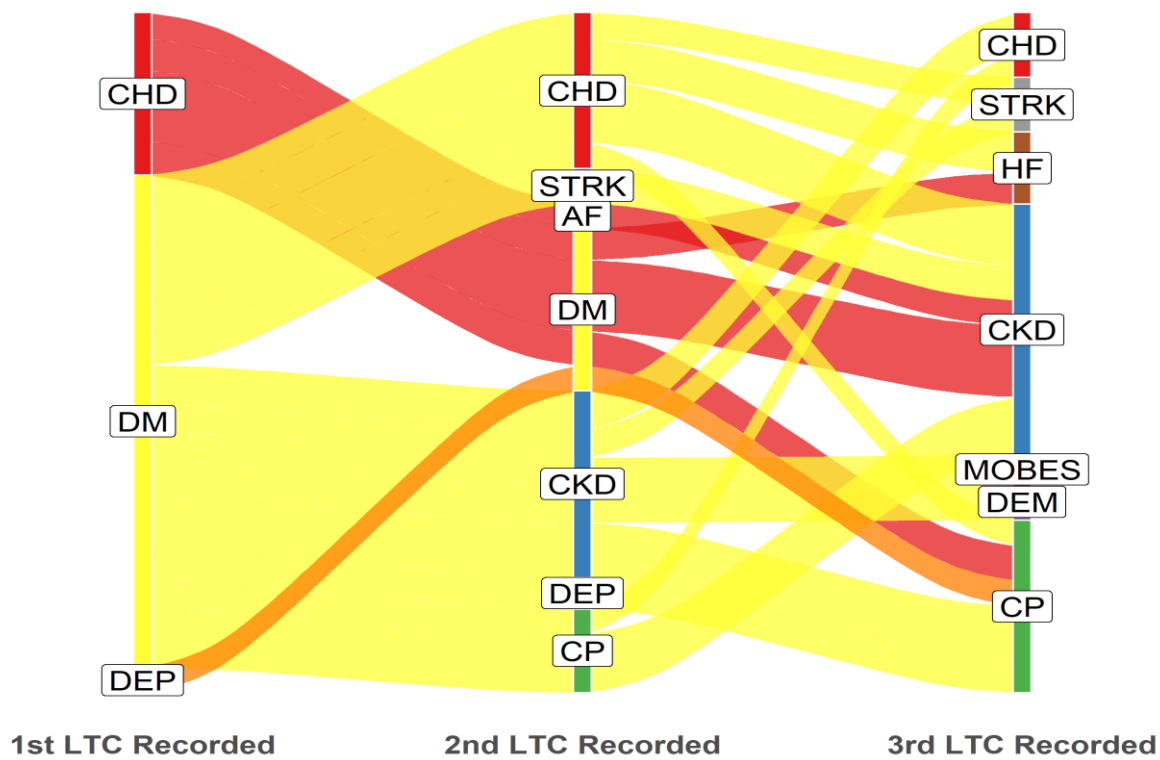

review only

1  
2  
3  
4  
5  
6  
7  
8  
9  
10  
11  
12  
13  
14  
15  
16  
17  
18  
19  
20  
21  
22  
23  
24  
25  
26  
27  
28  
29  
30  
31  
32  
33  
34  
35  
36  
37  
38  
39  
40  
41  
42  
43  
44  
45  
46  
47  
48  
49  
50  
51  
52  
53  
54  
55  
56  
57  
58  
59  
60

## Supplementary File

**Figure 1:** Area under Receiver Operating Characteristic (ROC) curve = 0.84; based on regression model presented in Table 5.

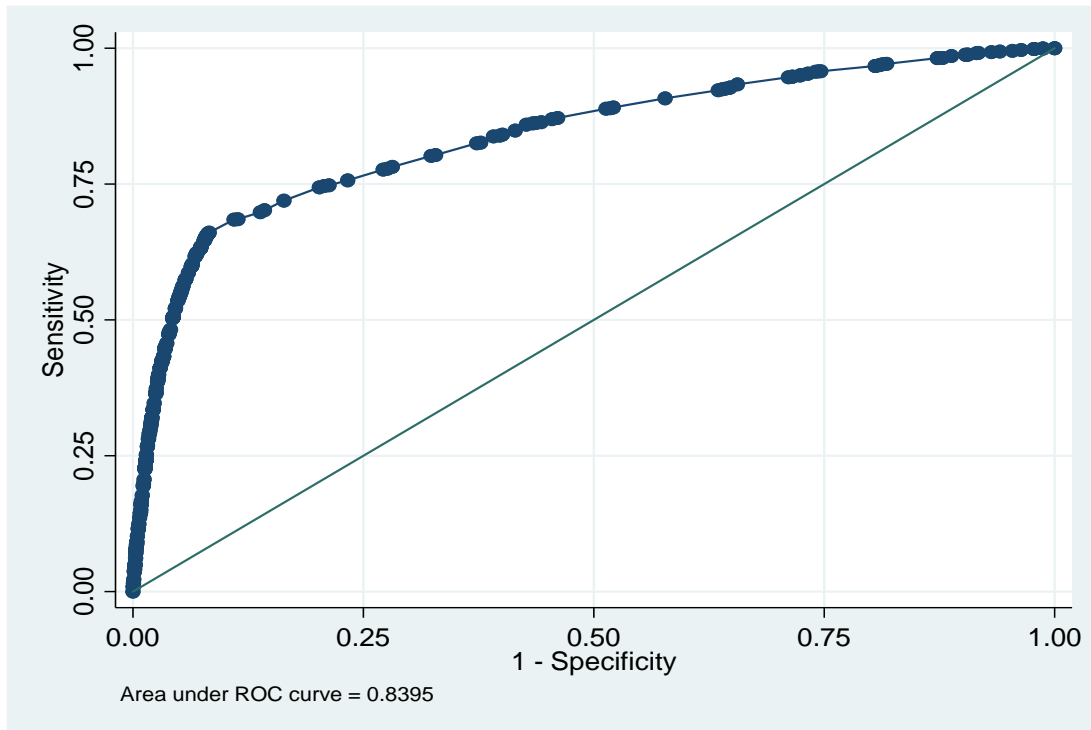

**Figure 2:** Area under Receiver Operating Characteristic (ROC) curve = 0.93; based on regression model presented in Table 5 with the addition of three risk factors: Hypertension, Smoking (ever), Obesity (moderate).

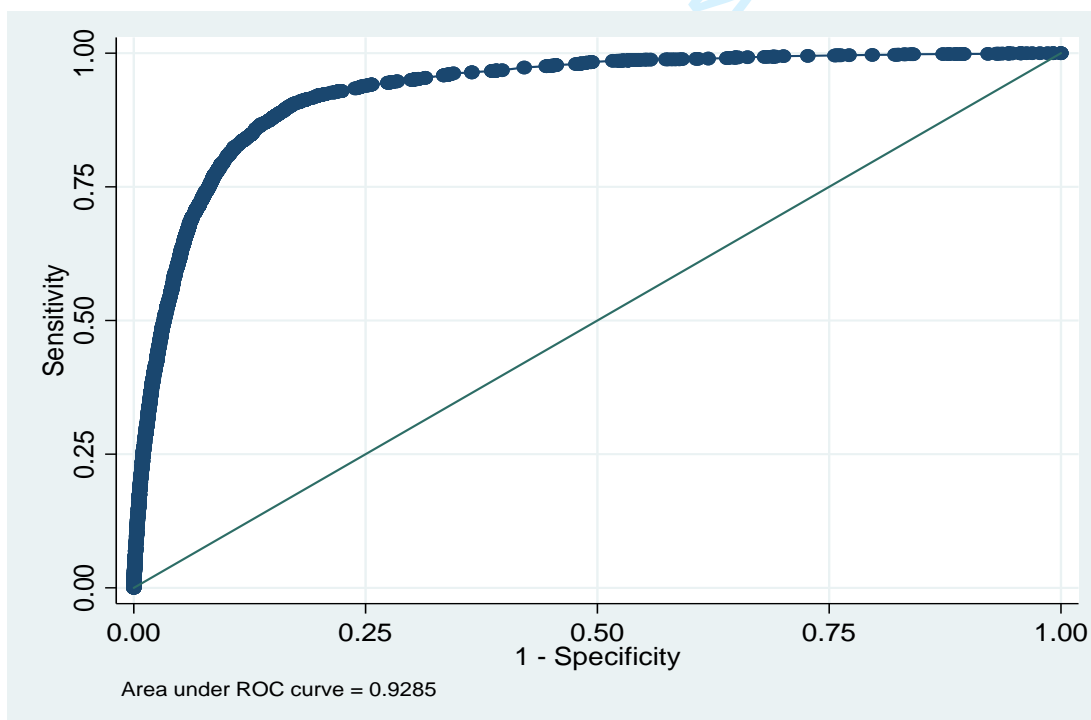

Figures 3-7 display un-edited alluvial plots for all available data. The figures in the main paper display alluvial plots edited to show dominant pathways.

**Figure 3:** Acquisition sequence of Long Term Conditions in the multimorbidity cohort (n = 5196); data excluded if simultaneous onset dates.

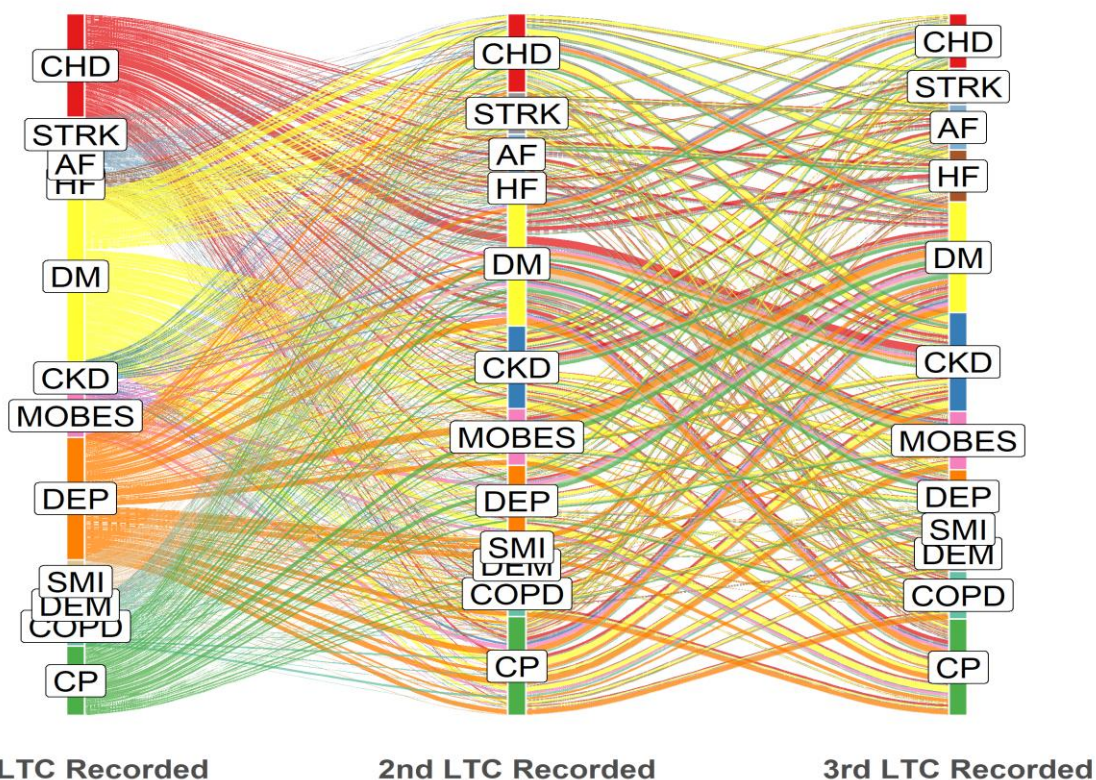

Long Term Condition label abbreviations (n = 12): CHD = Coronary Heart Disease; STRK = Stroke; AF = Atrial Fibrillation; HF = Heart Failure; DM = Diabetes; CKD = Chronic Kidney Disease; MOBES = Morbid Obesity; Dep = Depression; SMI = Serious Mental Illness; DEM = Dementia; COPD = Chronic Obstructive Pulmonary Disease; CP = Chronic Pain.

**Figure 4:** Most deprived quintile: alluvial plot displaying acquisition sequence of Long Term Conditions in the multimorbidity cohort (n = 1394).

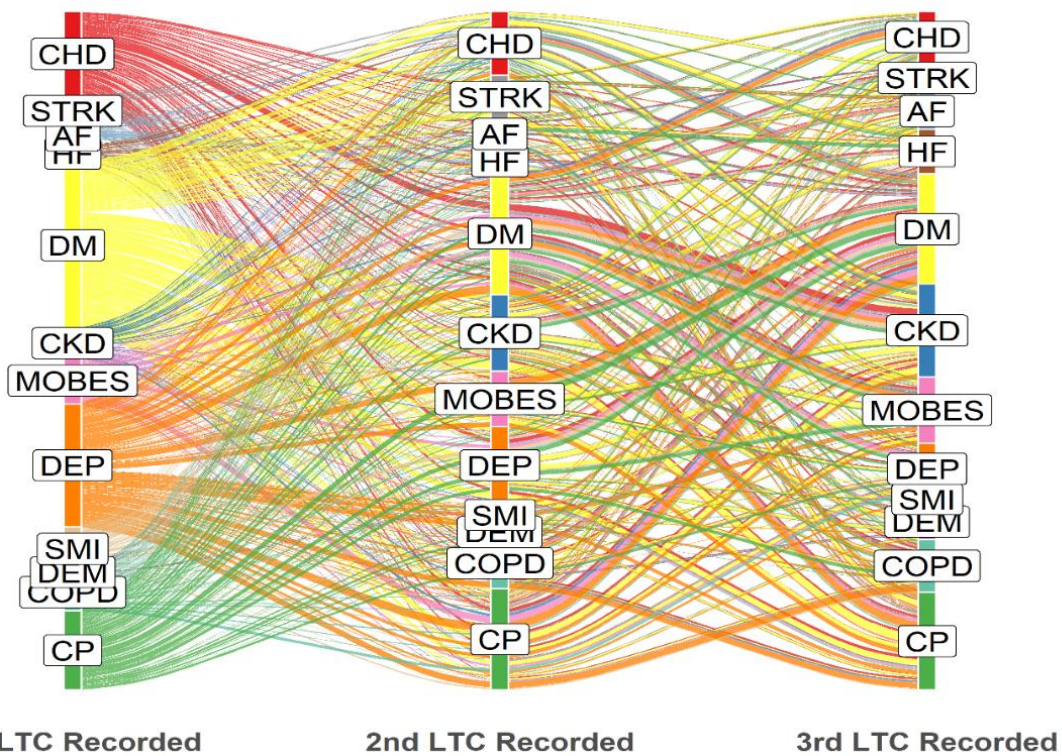

**Figure 5:** Least deprived quintile: alluvial plot displaying acquisition sequence of Long Term Conditions in the multimorbidity cohort (n = 763).

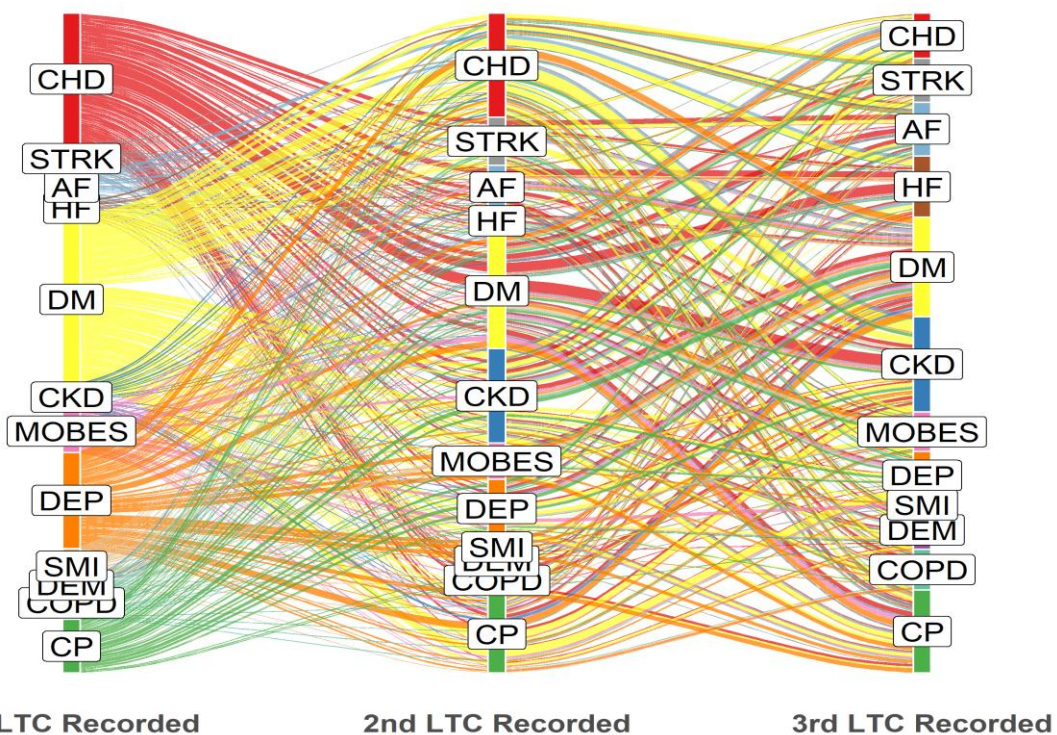

**Figure 6:** ‘White’ ethnic group: alluvial plot displaying acquisition sequence of Long Term Conditions in the multimorbidity cohort (n = 2788).

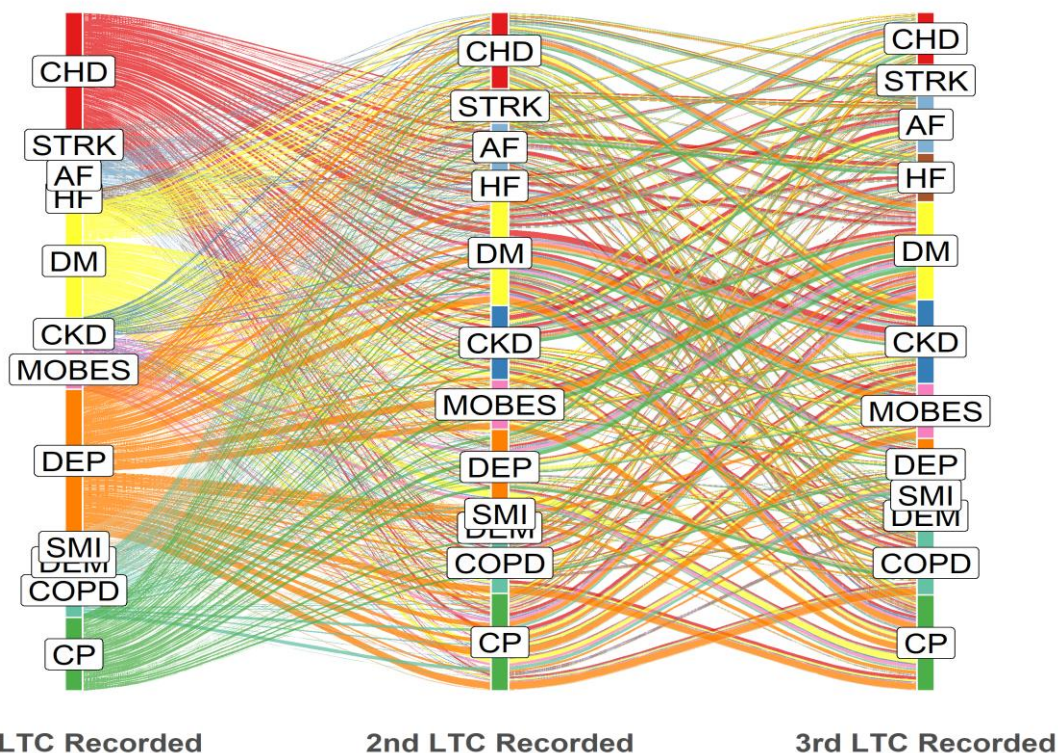

**Figure 7:** ‘Black’ ethnic group: alluvial plot displaying acquisition sequence of Long Term Conditions in the multimorbidity cohort (n = 1448).

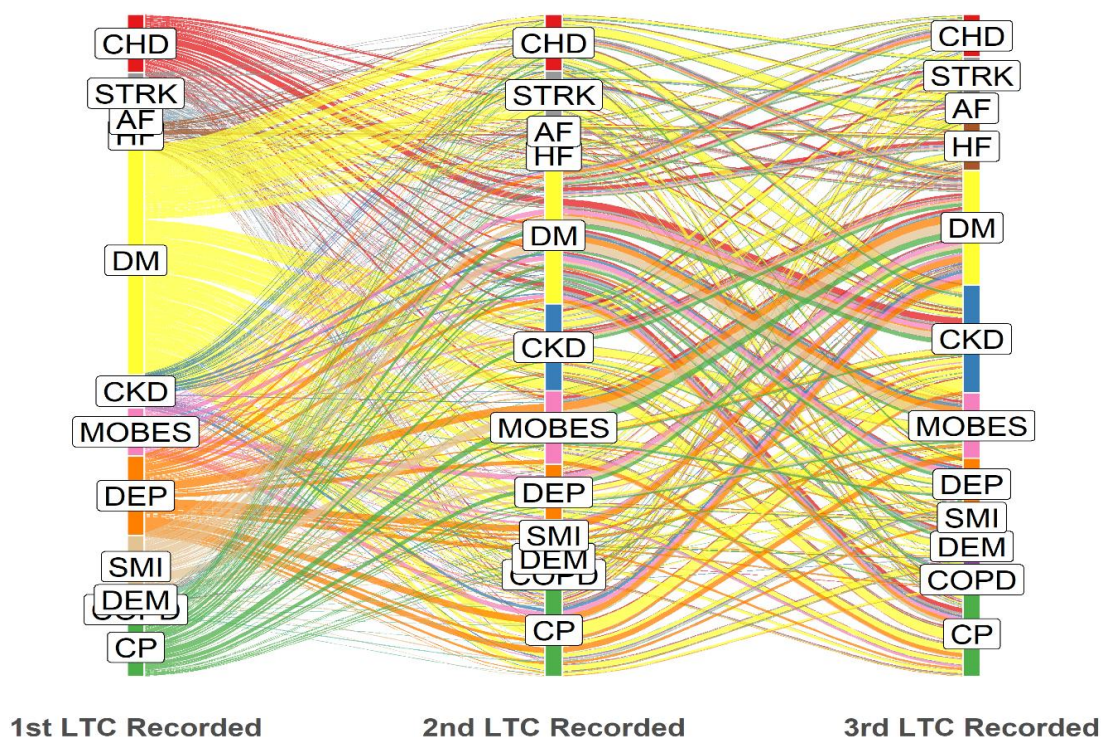



STROBE Statement—checklist of items that should be included in reports of observational studies

|                           | Item No. | Recommendation                                                                                      | Page No. | Relevant text from manuscript                                                                                                                                                                                                                                                                                                                                                                                                                                                                                                                                     |
|---------------------------|----------|-----------------------------------------------------------------------------------------------------|----------|-------------------------------------------------------------------------------------------------------------------------------------------------------------------------------------------------------------------------------------------------------------------------------------------------------------------------------------------------------------------------------------------------------------------------------------------------------------------------------------------------------------------------------------------------------------------|
| <b>Title and abstract</b> | 1        | (a) Indicate the study’s design with a commonly used term in the title or the abstract              | 1        | “Cross-sectional analysis and longitudinal study”                                                                                                                                                                                                                                                                                                                                                                                                                                                                                                                 |
|                           |          | (b) Provide in the abstract an informative and balanced summary of what was done and what was found | 1        | Summarised in Abstract: Design, Setting, Participants, Main outcome measures, Results                                                                                                                                                                                                                                                                                                                                                                                                                                                                             |
| <b>Introduction</b>       |          |                                                                                                     |          |                                                                                                                                                                                                                                                                                                                                                                                                                                                                                                                                                                   |
| Background/rationale      | 2        | Explain the scientific background and rationale for the investigation being reported                | 3-4      | The association between multimorbidity and social determinants and risk factors has not previously been determined in a deprived multi-ethnic community; identifying both the determinants of multimorbidity and the acquisition sequence may suggest interventions to prevent multimorbidity of slow its progression. <u>For the purposes of this study, a locally derived definition of ‘multimorbidity’ has been used based on predicted high healthcare and social care demand. In contrast, most previously reported studies of multimorbidity have more</u> |

For peer review only

1  
2  
3  
4  
5  
6  
7  
8  
9  
10  
11  
12  
13  
14  
15  
16  
17  
18  
19  
20  
21  
22  
23  
24  
25  
26  
27  
28  
29  
30  
31  
32  
33  
34  
35  
36  
37  
38  
39  
40  
41  
42  
43  
44  
45  
46

|                |   |                                                                                                                                                                                                                                                                                                                                                                                                                                                                                    |     |                                                                                                                                                                                                                                                                                                                                                      |
|----------------|---|------------------------------------------------------------------------------------------------------------------------------------------------------------------------------------------------------------------------------------------------------------------------------------------------------------------------------------------------------------------------------------------------------------------------------------------------------------------------------------|-----|------------------------------------------------------------------------------------------------------------------------------------------------------------------------------------------------------------------------------------------------------------------------------------------------------------------------------------------------------|
|                |   |                                                                                                                                                                                                                                                                                                                                                                                                                                                                                    |     | <u><a href="#">inclusive definitions of multimorbidity.</a></u>                                                                                                                                                                                                                                                                                      |
| Objectives     | 3 | State specific objectives, including any prespecified hypotheses                                                                                                                                                                                                                                                                                                                                                                                                                   | 1   | “To study the social determinants and risk factors for multimorbidity and the acquisition sequence of multimorbidity”                                                                                                                                                                                                                                |
| <b>Methods</b> |   |                                                                                                                                                                                                                                                                                                                                                                                                                                                                                    |     |                                                                                                                                                                                                                                                                                                                                                      |
| Study design   | 4 | Present key elements of study design early in the paper                                                                                                                                                                                                                                                                                                                                                                                                                            | 5   | Presented under ‘Data Variables’ and ‘Data Analysis’.                                                                                                                                                                                                                                                                                                |
| Setting        | 5 | Describe the setting, locations, and relevant dates, including periods of recruitment, exposure, follow-up, and data collection                                                                                                                                                                                                                                                                                                                                                    | 3   | Presented under ‘Study Setting’, ‘Study Design’, ‘Study population’.                                                                                                                                                                                                                                                                                 |
| Participants   | 6 | <p>(a) <i>Cohort study</i>—Give the eligibility criteria, and the sources and methods of selection of participants. Describe methods of follow-up</p> <p><i>Case-control study</i>—Give the eligibility criteria, and the sources and methods of case ascertainment and control selection. Give the rationale for the choice of cases and controls</p> <p><i>Cross-sectional study</i>—Give the eligibility criteria, and the sources and methods of selection of participants</p> | 4-5 | <p>Cross-sectional study: all patients registered at general practices in one south London borough (Lambeth) with the exception of those with an ‘informed dissent’ code in their case-notes.</p> <p>Longitudinal component: the same cohort of patients studied from onset of first Long Term Condition (LTC) to acquisition of 3 or more LTCs.</p> |
|                |   | <p>(b) <i>Cohort study</i>—For matched studies, give matching criteria and number of exposed and unexposed</p> <p><i>Case-control study</i>—For matched studies, give matching criteria and the number of controls per case</p>                                                                                                                                                                                                                                                    |     |                                                                                                                                                                                                                                                                                                                                                      |

|                           |    |                                                                                                                                                                                      |     |                                                                                                                                                                                                                                                                                                                         |
|---------------------------|----|--------------------------------------------------------------------------------------------------------------------------------------------------------------------------------------|-----|-------------------------------------------------------------------------------------------------------------------------------------------------------------------------------------------------------------------------------------------------------------------------------------------------------------------------|
| Variables                 | 7  | Clearly define all outcomes, exposures, predictors, potential confounders, and effect modifiers. Give diagnostic criteria, if applicable                                             | 5   | Summarised under the heading, ‘Data Variables’: “...routinely collected, anonymised, patient-level Read, EMIS and SNOMED coded information. Data were extracted from the EHR into a secure data warehouse .....and contained information on patient demographic characteristics, LTCs, clinical values and medication.” |
| Data sources/ measurement | 8* | For each variable of interest, give sources of data and details of methods of assessment (measurement). Describe comparability of assessment methods if there is more than one group | 5   | All data was derived from the Electronic Health Record of patients registered at GP practices in the sample area.                                                                                                                                                                                                       |
| Bias                      | 9  | Describe any efforts to address potential sources of bias                                                                                                                            | 5-6 | Patient records were all included in the analysis, reducing sampling bias. However, 4.0% of patients had an ‘informed dissent’ code in their case-notes, prohibiting any access to data. We were therefore unable to determine if the omission of these patients may have introduced bias                               |
| Study size                | 10 | Explain how the study size was arrived at                                                                                                                                            | 5-6 | As above – the sample of 332,353 patients represented all patients registered at GP practices in the study area, with the exception of those with                                                                                                                                                                       |

For peer review only

---

informed dissent codes. All Odds Ratios were presented with 95% CI's so that the effect of small numbers on the CI could be seen

---

Continued on next page

For peer review only

1  
2  
3  
4  
5  
6  
7  
8  
9  
10  
11  
12  
13  
14  
15  
16  
17  
18  
19  
20  
21  
22  
23  
24  
25  
26  
27  
28  
29  
30  
31  
32  
33  
34  
35  
36  
37  
38  
39  
40  
41  
42  
43  
44  
45  
46

|                        |     |                                                                                                                                                                                                                                                                                                           |            |                                                                                                                                                                              |
|------------------------|-----|-----------------------------------------------------------------------------------------------------------------------------------------------------------------------------------------------------------------------------------------------------------------------------------------------------------|------------|------------------------------------------------------------------------------------------------------------------------------------------------------------------------------|
| Quantitative variables | 11  | Explain how quantitative variables were handled in the analyses. If applicable, describe which groupings were chosen and why                                                                                                                                                                              | 5/6        | Quantitative variables analysed according to description in section headed, 'Data Analysis'.                                                                                 |
| Statistical methods    | 12  | (a) Describe all statistical methods, including those used to control for confounding                                                                                                                                                                                                                     | 5/6        | Regression modelling – see 'Data Analysis'                                                                                                                                   |
|                        |     | (b) Describe any methods used to examine subgroups and interactions                                                                                                                                                                                                                                       | 6          | Sub-groups of the key predictor variables were stratified (into age bands, deprivation quintiles, major ethnic groups)                                                       |
|                        |     | (c) Explain how missing data were addressed                                                                                                                                                                                                                                                               | 5/6        | See section on missing demographic codes, missing clinical codes, 'informed dissent codes'.                                                                                  |
|                        |     | (d) <i>Cohort study</i> —If applicable, explain how loss to follow-up was addressed<br><i>Case-control study</i> —If applicable, explain how matching of cases and controls was addressed<br><i>Cross-sectional study</i> —If applicable, describe analytical methods taking account of sampling strategy | n/a        | The study was not a sample                                                                                                                                                   |
|                        |     | (e) Describe any sensitivity analyses                                                                                                                                                                                                                                                                     | 8          | See heading 'Sensitivity analyses'                                                                                                                                           |
| <b>Results</b>         |     |                                                                                                                                                                                                                                                                                                           |            |                                                                                                                                                                              |
| Participants           | 13* | (a) Report numbers of individuals at each stage of study—eg numbers potentially eligible, examined for eligibility, confirmed eligible, included in the study, completing follow-up, and analysed                                                                                                         | 6/7        | Summarised under 'Multimorbidity cohort characteristics'.                                                                                                                    |
|                        |     | (b) Give reasons for non-participation at each stage                                                                                                                                                                                                                                                      | n/a        | n/a (exclusion criteria stated above)                                                                                                                                        |
|                        |     | (c) Consider use of a flow diagram                                                                                                                                                                                                                                                                        | n/a        | Exclusion criteria summarised on pg4-6 without use of a Flow diagram                                                                                                         |
| Descriptive data       | 14* | (a) Give characteristics of study participants (eg demographic, clinical, social) and information on exposures and potential confounders                                                                                                                                                                  | Tables 1,2 | Table 1 summarises, 'Frequencies of Long Term Conditions included in the multimorbidity cohort'; Table 2 summarises, 'Demographic characteristics of multimorbidity cohort'. |

|              |     |                                                                                                                                                                                                              |            |                                                                                                                                                                                                                       |
|--------------|-----|--------------------------------------------------------------------------------------------------------------------------------------------------------------------------------------------------------------|------------|-----------------------------------------------------------------------------------------------------------------------------------------------------------------------------------------------------------------------|
|              |     | (b) Indicate number of participants with missing data for each variable of interest                                                                                                                          | 5/6        | Missing data numbers summarised under, 'Multimorbidity cohort characteristics'                                                                                                                                        |
|              |     | (c) <i>Cohort study</i> —Summarise follow-up time (eg, average and total amount)                                                                                                                             | n/a        |                                                                                                                                                                                                                       |
| Outcome data | 15* | <i>Cohort study</i> —Report numbers of outcome events or summary measures over time                                                                                                                          | n/a        |                                                                                                                                                                                                                       |
|              |     | <i>Case-control study</i> —Report numbers in each exposure category, or summary measures of exposure                                                                                                         | n/a        |                                                                                                                                                                                                                       |
|              |     | <i>Cross-sectional study</i> —Report numbers of outcome events or summary measures                                                                                                                           | 13         | Summary measures in Table 2                                                                                                                                                                                           |
| Main results | 16  | (a) Give unadjusted estimates and, if applicable, confounder-adjusted estimates and their precision (eg, 95% confidence interval). Make clear which confounders were adjusted for and why they were included | Tables 1-5 | Univariable analysis presented in Tables 1, 2. Multivariable analysis presented in Tables 3,4,5. Table 3 includes different confounder variables to Tables 4,5. All confounder variables are presented in the Tables. |
|              |     | (b) Report category boundaries when continuous variables were categorized                                                                                                                                    | Tables 2-5 | Continuous variables were categorised: 'age' into 3 age bands; social deprivation into quintiles                                                                                                                      |
|              |     | (c) If relevant, consider translating estimates of relative risk into absolute risk for a meaningful time period                                                                                             | n/a        | The study was about the high risk of multimorbidity in specified groups, comparing the power of risk factors.                                                                                                         |

Continued on next page

|                          |    |                                                                                                                                                                            |                               |                                                                                                                                                                                   |
|--------------------------|----|----------------------------------------------------------------------------------------------------------------------------------------------------------------------------|-------------------------------|-----------------------------------------------------------------------------------------------------------------------------------------------------------------------------------|
| Other analyses           | 17 | Report other analyses done—eg analyses of subgroups and interactions, and sensitivity analyses                                                                             | Table 5; Supplementary file 1 | Sensitivity analyses summarised: logistic regression adjusted for clustering; Receiver Operating Characteristic curve                                                             |
| <b>Discussion</b>        |    |                                                                                                                                                                            |                               |                                                                                                                                                                                   |
| Key results              | 18 | Summarise key results with reference to study objectives                                                                                                                   | 13/14                         | Key finding summarised at opening of Discussion. The demographic and risk factors for multimorbidity are defined. The acquisition sequence of multimorbidity is described.        |
| Limitations              | 19 | Discuss limitations of the study, taking into account sources of potential bias or imprecision. Discuss both direction and magnitude of any potential bias                 | 14/15                         | Discussed under heading, ‘Strengths and Limitations’                                                                                                                              |
| Interpretation           | 20 | Give a cautious overall interpretation of results considering objectives, limitations, multiplicity of analyses, results from similar studies, and other relevant evidence | 15-17                         | Cautious interpretation summarised with reference to the literature. Cautious conclusion reached about possible interventions to prevent or delay multimorbidity onset.           |
| Generalisability         | 21 | Discuss the generalisability (external validity) of the study results                                                                                                      | 14/15                         | Summarised under, ‘Strengths and Limitations’. Findings were derived from one deprived, multi-ethnic community and may not generalise to less deprived, less diverse populations. |
| <b>Other information</b> |    |                                                                                                                                                                            |                               |                                                                                                                                                                                   |
| Funding                  | 22 | Give the source of funding and the role of the funders for the present study and, if applicable, for the original study on which the present article is based              | 18/19                         | The study was funded by the Guy’s and St Thomas’ Charity                                                                                                                          |

\*Give information separately for cases and controls in case-control studies and, if applicable, for exposed and unexposed groups in cohort and cross-sectional studies.

1  
2 **Note:** An Explanation and Elaboration article discusses each checklist item and gives methodological background and published examples of transparent reporting. The STROBE  
3 checklist is best used in conjunction with this article (freely available on the Web sites of PLoS Medicine at <http://www.plosmedicine.org/>, Annals of Internal Medicine at  
4 <http://www.annals.org/>, and Epidemiology at <http://www.epidem.com/>). Information on the STROBE Initiative is available at [www.strobe-statement.org](http://www.strobe-statement.org).  
5  
6  
7  
8  
9  
10  
11  
12  
13  
14  
15  
16  
17  
18  
19  
20  
21  
22  
23  
24  
25  
26  
27  
28  
29  
30  
31  
32  
33  
34  
35  
36  
37  
38  
39  
40  
41  
42  
43  
44  
45  
46

For peer review only



# BMJ Open

**The journey to multimorbidity: a longitudinal analysis exploring cardiovascular risk factors and socio-demographic determinants in an urban setting.**

|                                 |                                                                                                                                                                                                                                                                                                                                                                                                                                                                                                                                                                                                                                                                                              |
|---------------------------------|----------------------------------------------------------------------------------------------------------------------------------------------------------------------------------------------------------------------------------------------------------------------------------------------------------------------------------------------------------------------------------------------------------------------------------------------------------------------------------------------------------------------------------------------------------------------------------------------------------------------------------------------------------------------------------------------|
| Journal:                        | <i>BMJ Open</i>                                                                                                                                                                                                                                                                                                                                                                                                                                                                                                                                                                                                                                                                              |
| Manuscript ID                   | bmjopen-2019-031649.R2                                                                                                                                                                                                                                                                                                                                                                                                                                                                                                                                                                                                                                                                       |
| Article Type:                   | Original research                                                                                                                                                                                                                                                                                                                                                                                                                                                                                                                                                                                                                                                                            |
| Date Submitted by the Author:   | 01-Nov-2019                                                                                                                                                                                                                                                                                                                                                                                                                                                                                                                                                                                                                                                                                  |
| Complete List of Authors:       | Ashworth, Mark; King's College London Faculty of Life Sciences and Medicine, School of Population Health & Environmental Sciences<br>Durbaba, Stevo; King's College London Faculty of Life Sciences and Medicine, School of Population Health & Environmental Sciences<br>Whitney, David; King's College London Faculty of Life Sciences and Medicine, School of Population Health & Environmental Sciences<br>Crompton, James; London Borough of Lambeth, Public Health, Adults and Health<br>Wright, Michael; King's College London Faculty of Life Sciences and Medicine, School of Population Health & Environmental Sciences<br>Dodhia, Hiten; London Borough of Lambeth, Public Health |
| <b>Primary Subject Heading</b>: | General practice / Family practice                                                                                                                                                                                                                                                                                                                                                                                                                                                                                                                                                                                                                                                           |
| Secondary Subject Heading:      | Public health                                                                                                                                                                                                                                                                                                                                                                                                                                                                                                                                                                                                                                                                                |
| Keywords:                       | PRIMARY CARE, Multimorbidity, Demographic factors, Risk factors                                                                                                                                                                                                                                                                                                                                                                                                                                                                                                                                                                                                                              |
|                                 |                                                                                                                                                                                                                                                                                                                                                                                                                                                                                                                                                                                                                                                                                              |

SCHOLARONE™  
Manuscripts

**TITLE:**

The journey to multimorbidity: a longitudinal analysis exploring cardiovascular risk factors and socio-demographic determinants in an urban setting

**AUTHORS:**

Mark Ashworth<sup>1</sup>, Stevo Durbaba<sup>2</sup>, David Whitney<sup>3</sup>, James Crompton<sup>4</sup>, Michael Wright<sup>5</sup> Hiten Dodhia<sup>6</sup>.

1. Reader in Primary Care, School of Population Health & Environmental Sciences, King's College London, London, UK
2. e-Resources Developer, School of Population Health & Environmental Sciences, King's College London, London, UK
3. Data Analyst, School of Population Health & Environmental Sciences, King's College London, London, UK
4. Head of Health Intelligence, Public Health, Adults and Health, London Borough of Lambeth, London, UK
5. Project Manager, School of Population Health & Environmental Sciences, King's College London, London, UK
6. Consultant in Public Health, London Borough of Lambeth, London, UK

Corresponding author email: [mark.ashworth@kcl.ac.uk](mailto:mark.ashworth@kcl.ac.uk)

**WORD COUNT:** 3657

**ABSTRACT**

**Objective.** To study the social determinants and cardiovascular risk factors for multimorbidity and the acquisition sequence of multimorbidity.

**Design.** Longitudinal study based on anonymised primary care data.

**Setting.** General practices in an urban multi-ethnic borough in London, UK.

**Participants.** 332,353 patients aged  $\geq 18$  years.

**Main outcome measures.** Clinical and socio-demographic characteristics of patients with multimorbidity, defined as  $\geq 3$  of 12 Long Term Conditions (LTCs) selected according to high predicted healthcare utilisation. Multilevel logistic regression was used to model the social determinants and cardiovascular risk factors. Alluvial plots were constructed to illustrate multimorbidity acquisition sequences according to age, ethnicity and social deprivation.

**Results.** 5597 (1.7%) patients had  $\geq 3$  selected LTCs, the 'multimorbidity cohort'. The commonest LTCs were diabetes (63.0%) and chronic pain (42.8%). Social deprivation and ethnicity were independent determinants of multimorbidity: most compared to least deprived quintile, Adjusted Odds Ratio (AOR) 1.56 (95%CI, 1.41, 1.72); South Asian compared to white ethnicity, AOR 1.44 (95%CI, 1.29, 1.61); black compared to white ethnicity, AOR 0.86 (95%CI, 0.80, 0.92). The included cardiovascular risk factors were relatively strong determinants of multimorbidity: hypertension, AOR 5.05 (95%CI, 4.69, 5.44); moderate obesity, AOR 3.41 (95%CI, 3.21, 3.63); smoking, AOR 2.30 (95%CI, 2.16, 2.45). The most common initial onset conditions were diabetes and depression; diabetes particularly in older and black ethnic groups; depression particularly in younger, more deprived and white ethnicity groups. Chronic pain was less common as an initial condition.

**Conclusions** Our findings confirm the importance of age, social deprivation and ethnicity as determinants of multimorbidity. Smoking, obesity and hypertension as cardiovascular risk factors were stronger determinants of multimorbidity than deprivation or ethnicity. The acquisition sequence of multimorbidity is patterned by socio-demographic determinants. Understanding onset conditions of multimorbidity and cardiovascular cardiovascular risk factors may lead to the development of interventions to slow the progression of multimorbidity.

### Strengths and limitations

- This study uses a definition of multimorbidity based on Long Term Conditions (LTCs) with high predicted healthcare utilisation rates
- Multimorbidity is studied in a deprived, multi-ethnic community
- Longitudinal data is used to identify the acquisition sequence of multimorbidity and how this is influenced by socio-demographic determinants
- Difficulties gaining access to anonymised primary care data limited the sample size and may have contributed to selection bias
- Coding validation and completeness restricted the analysis of available primary care data

### BACKGROUND

Healthcare utilisation is increasingly driven by multimorbidity (1). Each long-term condition (LTC) included within a definition of multimorbidity is likely to generate multiple primary care consultations with general practitioners (GPs), practice nurses and other health care professionals, and may result in Accident and Emergency (A&E) attendances, referral to out-patient appointments and hospital admissions.

Estimates of healthcare utilisation attributable to multimorbidity vary according to the LTCs included within a definition of multimorbidity. There is no standard definition of multimorbidity. One systematic review noted that the number of included LTCs ranged from five to 185 with estimates of population prevalence ranging from 13.1% to 71.8% depending on the number of included conditions (2). In one recent UK study in which multimorbidity was defined as two or more of a selection of 36 LTCs, 27.2% of the population had multimorbidity, accounting for 52.9% of GP consultations and generating a median of nine annual GP consultations (3). LTCs also contribute to the development of frailty, itself a driver of healthcare utilisation (4).

In response to high demand for health and social care, many healthcare providers and commissioners have sought to identify those patients with greatest needs through a process termed

1  
2  
3 'risk stratification'. Several electronic tools have been developed to offer population based risk  
4 stratification (5). An alternative approach is the use of expert panels to define high-demand patient  
5 groups (6). Having identified the cohort of patients with the greatest requirement for health and  
6 social care services, the purpose of this process is to guide resource allocation on a needs basis,  
7 often with the implicit assumption that additional investment in a primary care setting may reduce  
8 demand for more expensive secondary care services. Although funding and healthcare need should  
9 align, there is little evidence that investment in additional community resources for those most at  
10 risk of hospital attendance results in overall reductions in secondary care utilisation (7).

11  
12  
13  
14  
15  
16  
17  
18  
19  
20  
21  
22 Following a consultation exercise and report from an expert panel, two inner London boroughs and  
23 their commissioning groups made the decision to define multimorbidity based on predicted high  
24 healthcare and social care demand. Multimorbidity in this context consisted of three or more LTCs  
25 considered most likely to result in functional impairment and high service demand. This 'high service  
26 demand' definition was used to identify a cohort to receive a package of integrated care, termed  
27 'care coordination'. A focus on this narrowly defined category of multimorbidity would inevitably  
28 mean that the proportion of patients defined as 'multimorbid' would be lower than reported in  
29 studies based on broader definitions of multimorbidity (2,3).

30  
31  
32  
33  
34  
35  
36  
37  
38  
39  
40 The aim was to study the characteristics of this multimorbidity cohort. The main objectives were to  
41 define both the socio-demographic determinants and cardiovascular risk factors associated with  
42 multimorbidity acquisition; also to determine the acquisition sequence of multimorbidity and the  
43 influence of demographic factors on this sequence.

## 44 45 46 47 48 49 **METHODS**

### 50 51 52 **Study setting**

53  
54  
55  
56 Our study was set in Lambeth, one of the two inner London UK boroughs adopting the 'care  
57 coordination' definition of multimorbidity (8). The population sample consisted of all patients  
58  
59  
60

1  
2  
3 registered at all general practices (n = 44) in Lambeth, with the exception of patients who had opted  
4  
5 out of anonymised data sharing for research purposes.  
6  
7

### 8 **Study design**

9  
10  
11 We conducted a longitudinal analysis based on anonymised coded primary care data extracted from  
12  
13 electronic health records (EHR) held in primary care.  
14  
15

### 16 **Study population**

17  
18  
19 We included data on all patients aged 18 years and over registered with a general practice. For the  
20  
21 population with multimorbidity, we included all those with LTCs recorded in the EHR and included in  
22  
23 the 'care coordination' definition of multimorbidity: Atrial Fibrillation (AF), Chronic Obstructive  
24  
25 Pulmonary Disease (COPD), Chronic Pain (CP), Chronic Kidney Disease (CKD), Coronary Heart Disease  
26  
27 (CHD), Diabetes (DM), Dementia, Depression, Heart Failure (HF), Serious Mental Illness (SMI), Stroke,  
28  
29 Morbid Obesity. The definition and specified codes for each condition was that used by the Quality  
30  
31 and Outcomes Framework (QOF), based on 'QOF38' definitions (9). Two of the conditions selected  
32  
33 for inclusion within the definition of multimorbidity were not included within the QOF: chronic pain,  
34  
35 defined on the basis of two or more repeat prescriptions for opioid analgesics (British National  
36  
37 Formulary, chapter 4.7.2) or neuropathic pain medication (British National Formulary, chapter 4.7.3)  
38  
39 (10); morbid obesity defined as a Body Mass Index  $\geq 40$  kg/m<sup>2</sup>. For each LTC, the date of onset was  
40  
41 obtained from the EHR and used in the longitudinal analysis.  
42  
43  
44  
45

46  
47 Demographic data consisted of gender, age in years (on the date of data extraction) and self-  
48  
49 ascribed ethnicity obtained from the EHR. Social deprivation data derived from residency data was  
50  
51 based on the Index of Multiple Deprivation 2010 classification at Lower Super Output Area (LSOA),  
52  
53 stratified into locally based quintiles (11). Local deprivation quintiles were used in place of national  
54  
55 quintiles since mean deprivation levels are high in Lambeth, the 22<sup>nd</sup> most deprived local authority  
56  
57 (out of 326) in England (12).  
58  
59  
60

1  
2  
3 Cardiovascular risk factors included in the analysis were: hypertension (defined as patients on the  
4 QOF Hypertension register); moderate obesity (defined as a Body Mass Index of 30.0-39.9; note that  
5 patients with BMI  $\geq 40$  were included as one of the LTCs within the definition of multimorbidity and  
6 therefore not included as a cardiovascular risk factor); smoking (patients with any record of being a  
7 smoker).  
8  
9  
10  
11  
12  
13

### 14 15 **Data variables**

16  
17 The data consisted of 'real world', routinely collected, anonymised, patient-level Read, EMIS and  
18 SNOMED coded information. Routinely collected electronic data was available from all included  
19 practices from 2004. Data were extracted from the EHR into a secure data warehouse and contained  
20 information on patient demographic characteristics, LTCs, clinical values and medication. The data  
21 used in this study were extracted in May 2018 and related to all patients registered at each of the  
22 included practices on that date.  
23  
24  
25  
26  
27  
28  
29  
30

### 31 32 **Data analysis**

33  
34 We analysed socio-demographic (age, gender, ethnicity), social (area level deprivation) and  
35 cardiovascular risk factor (hypertension, moderate obesity, smoking status) data for the  
36 multimorbidity cohort and general population using univariable statistical methods applied at  
37 patient-level. Socio-demographic and cardiovascular risk factor determinants of multimorbidity were  
38 analysed using multilevel logistic regression models to model practice level variation. We also  
39 conducted a sensitivity analysis using logistic regression models adjusted for clustering at the  
40 practice level. The sensitivity analysis allowed pseudo- $r^2$  values and Receiver Operating  
41 Characteristic (ROC) curves to be derived. Analysis was conducted using the statistical software  
42 package STATA IC 15 (13).  
43  
44  
45  
46  
47  
48  
49  
50  
51  
52  
53

54  
55 The acquisition sequence for patients in the multimorbidity cohort was established by searching the  
56 EHR for date of onset of each LTC. For this analysis, we established the order of acquisition and  
57  
58  
59  
60

1  
2  
3 tabulated the frequency of first, second and third LTCs. Patients with identical dates of onset  
4  
5 recorded for two or more LTCs were excluded from this analysis. We displayed findings using alluvial  
6  
7 plots, an infographic allowing representation of multiple pathways. These were constructed using  
8  
9 the software R, and the packages 'ggplot2' and 'ggalluvial' (14).

### 11 12 **Patient and public involvement**

13  
14  
15 The borough based and statutory organisation, Lambeth HealthWatch, represented the interests of  
16  
17 patients and public in this work; they contributed to the original protocol design and shared in  
18  
19 dissemination of the findings.  
20  
21  
22

## 23 **RESULTS**

### 24 **Multimorbidity cohort characteristics**

25  
26  
27 The final study population consisted of 332,353 patients aged  $\geq 18$  years. Data from 13,369 (4.0%)  
28  
29 patients had been excluded because a data sharing opt-out code was recorded in their EHR. Patients  
30  
31 were included in the final sample even though some socio-demographic data were missing: 3289  
32  
33 (0.99%) patients could not be linked to a LSOA and therefore had missing IMD-2015 score data;  $\leq 10$   
34  
35 patients had missing coded gender data;  $\leq 10$  patients had missing coded age data. Patients with any  
36  
37 category of missing data ( $n = 3301$ ) were excluded from the multivariable analysis.  
38  
39  
40  
41  
42

43 In all, 5597 (1.7%) patients had a record of three or more of the selected LTCs, the 'multimorbidity  
44  
45 cohort'. Most ( $n = 3542$ ) of this cohort had three LTCs (63.3%); 1333 (23.8%) had four LTCs; 492  
46  
47 (8.8%) had 5 LTCs; the remaining 230 (4.1%) had more than 5 LTCs. Of the remaining population,  
48  
49 45,241 (13.6%) had one LTC and 10,992 (3.3%) had two LTCs.  
50  
51

52 A summary of LTC frequencies within the multimorbidity cohort is displayed in Table 1. The most  
53  
54 common LTCs within this cohort were: DM (63.0%) and chronic pain (42.8%). In contrast, the most  
55  
56 common of the included LTCs in the adult general population were: depression (8.4%), DM (5.4%)  
57  
58 and morbid obesity (3.2%).  
59  
60



1  
2  
3 The socio-demographic characteristics of the multimorbidity cohort are displayed in Table 2. Within  
4 the cohort, 33.9% were aged under 65 years (compared with 91.7% in the sample population);  
5  
6 27.7% were of a 'Black' ethnicity (18.0% in the sample population) and 46.0% were born in the UK  
7  
8 (45.2% in the sample population). The mean age for the multimorbid cohort was 69.9 years  
9  
10 (compared with a mean of 41.6 years in the sample population). The mean age for multimorbid  
11  
12 patients in least and most deprived quintiles was 73.0 (standard deviation (SD), 13.5) and 69.3 (SD,  
13  
14 12.9) years, respectively; and for the white, black and south Asian populations was 71.2 (SD, 13.3),  
15  
16 69.4 (SD, 14.3) and 71.9 (SD, 11.8) years, respectively.  
17  
18  
19  
20  
21

### 22 **Multimorbidity cohort socio-demographic determinants**

23  
24 Socio-demographic determinants of the multimorbidity cohort were dominated by the effect of  
25  
26 older age groups, but also included social deprivation and ethnicity (Supplementary file: Table 1).  
27  
28 Based on the adjusted odds ratio (AOR) derived from the multilevel regression model, the strongest  
29  
30 determinant for multimorbidity was related to age. After adjustment for age, both social deprivation  
31  
32 (the more deprived quintiles) and ethnicity (Black and south Asian ethnicities) remained significant  
33  
34 determinants, albeit with much smaller odds ratios. The AOR for black and South Asian compared  
35  
36 with white ethnicity was 1.15 (95% CIs, 1.07, 1.23) and 1.19 (95% CIs, 1.07, 1.33), respectively; for  
37  
38 most compared to least deprived quintile, the AOR was 1.83 (95% CIs, 1.66, 2.02).  
39  
40  
41  
42

### 43 **Multimorbidity cohort cardiovascular risk factor determinants**

44  
45 Addition of the three cardiovascular risk factors included in the study attenuated the odds ratios for  
46  
47 multimorbidity related to age (Table 3). Social deprivation remained a determinant of  
48  
49 multimorbidity: for most compared to least deprived quintile, the AOR was 1.56 (95% CIs, 1.41,  
50  
51 1.72). South Asian ethnicity remained a significant determinant of multimorbidity: AOR 1.44 (95%  
52  
53 CIs, 1.29, 1.61) but black ethnicity was no longer a positive determinant: AOR 0.86 (95% CIs, 0.80,  
54  
55 0.92).  
56  
57  
58  
59  
60

1  
2  
3 The three cardiovascular risk factors were significant determinants of multimorbidity: hypertension,  
4 AOR 5.05 (95% CIs, 4.69, 5.44); moderate obesity, AOR 3.41 (95% CIs, 3.21, 3.63); smoking, AOR 2.30  
5  
6 (95% CIs, 2.16, 2.45).  
7  
8  
9

### 10 **Sensitivity analyses**

11  
12  
13 Re-analysis of the determinants of multimorbidity using regression modelling adjusted for clustering  
14  
15 at practice level resulted in similar adjusted odds ratios to those obtained in the primary  
16  
17 analyses (Supplementary file: Table 2). We explored goodness-of-fit through derived pseudo- $r^2$   
18  
19 values for demographic determinants: pseudo- $r^2 = 0.22$ , and for cardiovascular risk factor adjusted  
20  
21 determinants (hypertension, moderate obesity, smoking): pseudo- $r^2 = 0.32$ . The areas under the  
22  
23 ROC curve for each model were 0.84 and 0.93, respectively (Supplementary file: Figures 1,2).  
24  
25  
26  
27

### 28 **Multimorbidity acquisition sequence**

29  
30 Of the 5597 patients in the multimorbidity cohort, 5196 had three distinct dates of onset for each of  
31  
32 their three or more component LTCs. The remaining 401 (7.2%) patients had identical dates of onset  
33  
34 recorded for two or three of their first three LTCs and therefore could not be classified into a  
35  
36 sequence. Alluvial plots were constructed displaying the acquisition sequence for LTCs and edited to  
37  
38 display dominant flows of patients in each category. Figure 1 displays the three most common  
39  
40 starting conditions and subsequent most commonly acquired second and third LTCs. Unedited  
41  
42 alluvial plots displaying all patient flows are shown in the Supplementary file, Figure 3.  
43  
44  
45  
46

47 The alluvial plots illustrate that diabetes and depression were the most common starting conditions  
48  
49 for patients with multimorbidity; diabetes was also relatively common as the second or third  
50  
51 acquired LTC whereas depression was predominantly a first-onset LTC (Figure 1).  
52  
53

54 In the most deprived quintile, diabetes and depression were the most common starting conditions  
55  
56 whereas in the least deprived quintile, diabetes and CHD were more common as starting conditions  
57  
58  
59  
60

1  
2  
3 than depression (Figures 2, 3). Unedited alluvial plots comparing most and least deprived quintiles  
4  
5 are shown in the Supplementary file, Figures 4, 5.  
6  
7

8 Multimorbidity in the white ethnic group was dominated by depression as the starting condition,  
9  
10 whereas in the black ethnic group diabetes was the most common starting condition, with  
11  
12 depression and SMI also relatively common (Figures 4, 5). Relatively small numbers resulted in poor  
13  
14 definition of the alluvial plot in the South Asian group and this figure is not presented. Unedited  
15  
16 alluvial plots comparing black and white ethnic groups are shown in the Supplementary file Figures  
17  
18 6, 7.  
19  
20

21  
22 Multimorbidity in the under 65 year old cohort was dominated by depression as the starting  
23  
24 condition, with SMI also relatively common; in the  $\geq 65$  year old cohort, diabetes and CHD were the  
25  
26 most common starting conditions (Figures 6, 7).  
27  
28

29  
30 Chronic pain appeared to be more common as a second or third acquired LTC but less common as a  
31  
32 first LTC. This sequence was apparent in the overall picture, in the pattern displayed by least and  
33  
34 most deprived quintiles, for black and white ethnicities and for younger and older age cohorts.  
35  
36

37 Morbid obesity was among the more common starting conditions in the most deprived cohort and  
38  
39 younger age cohort. However, in other socio-demographic samples, morbid obesity was more  
40  
41 common as a second and third acquired LTC.  
42  
43

## 44 **DISCUSSION**

45  
46  
47 We report on multimorbidity using a definition originating from a health service commissioning  
48  
49 perspective, consisting of three or more of 12 LTCs selected because of likely high impact upon  
50  
51 health service and social care utilisation. In total, 1.7% of the adult population in our study sample  
52  
53 had multimorbidity according to these narrowly defined criteria. Diabetes and chronic pain were the  
54  
55 most prevalent LTCs within this cohort. Independent of age, both ethnicity and social deprivation  
56  
57 were significant determinants of multimorbidity. However, the cardiovascular risk factors of  
58  
59  
60

1  
2  
3 hypertension, obesity and smoking were more strongly associated with multimorbidity than social  
4 deprivation or ethnicity.  
5  
6

7  
8 The acquisition sequence of multimorbidity differed substantially according to age, ethnicity and  
9 social deprivation. Diabetes and depression were the most common starting conditions overall.

10  
11 Diabetes as a starting condition was notably more common in the older and black ethnic group.

12  
13 Depression as a starting condition was notably more common in patients who were younger, more  
14 deprived and in the white ethnic group. Differences in acquisition sequence between most and least  
15 deprived areas and white and black ethnicities (Figures 2 - 5) are unlikely to have been strongly  
16 influenced by age differences since mean age was similar for each of these cohorts.  
17  
18  
19  
20  
21  
22  
23

### 24 **Strengths and Limitations**

25  
26 Data access was a limitation to this analysis. We were only able to obtain data from one of the two  
27 boroughs adopting this approach to multimorbidity, the other lacked a data extraction system  
28 preventing us from analysing large datasets of patient-level data. Had we gained access to the data,  
29 this would have approximately doubled our sample size and enabled further analysis of  
30 multimorbidity in deprived, multi-ethnic populations. This difficulty in accessing anonymised data  
31 hampers the analysis of patient-level data in many areas of the UK (15). Data coding constrains the  
32 analysis of primary care data and we were only able to study the association of multimorbidity with  
33 a limited range of cardiovascular risk factors while other known risk factors such as exercise and diet  
34 could not be captured. We aimed to display the acquisition sequence of LTCs using alluvial plots.  
35  
36 Although these plots clearly display the sequence in which patients develop LTCs, they do not readily  
37 display time data and thus fail to distinguish between rapidly and slowly progressing multimorbidity.  
38  
39 A time-to-event analysis is required for identifying those patients who progress rapidly from first LTC  
40 into multimorbidity, which is the subject of further study. Similarly, the acquisition sequence could  
41 not be determined for a small minority of patients with identical LTC date-of-onset recording by GPs  
42 whereas in reality, it is unlikely that the LTC onset dates were simultaneous. Furthermore, as with all  
43  
44  
45  
46  
47  
48  
49  
50  
51  
52  
53  
54  
55  
56  
57  
58  
59  
60

1  
2  
3 studies based on primary care data, there may be coding anomalies which introduce bias into the  
4  
5 estimates of LTC prevalence. QOF coding criteria were used for 10 of the included LTCs,  
6  
7 standardising the definition. However, the prevalence of conditions such as depression may be  
8  
9 underestimated using QOF criteria (16). For the two LTCs not included in the QOF, the definition is  
10  
11 dependent on GP coding. Thus 'morbid obesity' was only included in our study if there was a BMI  
12  
13 recording which may have resulted in an under-estimate of prevalence. 'Chronic pain' was defined  
14  
15 based on medication consumption whereas many patients with chronic pain may have sought  
16  
17 alternatives to analgesic medication resulting in an underestimate of prevalence; conversely, our  
18  
19 inclusion criteria of 'two or more prescriptions over the preceding year' may have resulted in an  
20  
21 overestimate of prevalence, with some patients recovering from chronic pain during the course of  
22  
23 the year. In common with other observational studies, significant associations between  
24  
25 multimorbidity and socio-demographic or cardiovascular risk factor determinants may imply, but  
26  
27 cannot prove, causality. Whilst interventional studies are required to obtain stronger evidence of  
28  
29 causality, causal inference may be derived by time series analyses and further study of potential  
30  
31 confounding and residual variance. Finally, the richness of locally based data covering a whole  
32  
33 borough with unique socio-demographic characteristics has to be offset against possible loss of  
34  
35 generalisability to other areas with very different social deprivation and ethnicity characteristics.  
36  
37  
38  
39  
40

#### 41 **Comparison with the literature**

42  
43  
44 Our cross-sectional data, although conducted in a deprived, multi-ethnic population, are similar to  
45  
46 the findings of others reporting on increased multimorbidity prevalence associated with age, social  
47  
48 deprivation and ethnic minority status (17). Comparison with other multimorbidity studies is difficult  
49  
50 because of the highly restricted definition of multimorbidity used in the current study. Nevertheless,  
51  
52 other studies have reported the high prevalence of both diabetes and depression in multimorbidity  
53  
54 cohorts (3, 17). A higher prevalence of mental health and physical health LTC combinations has been  
55  
56 noted in deprived areas, although in our own study we did not conduct an analysis to identify  
57  
58  
59  
60

1  
2  
3 specific LTC combinations (18). Certain conditions have been found to be more prevalent in deprived  
4  
5 communities, also contributing to higher prevalence of multimorbidity in these areas, such as  
6  
7 depression and addiction issues in younger deprived populations (19), or more generally,  
8  
9 depression, drugs, anxiety, dyspepsia, chronic pain, CHD, DM (20). These findings are aligned to our  
10  
11 own reporting of high proportions of multimorbid patients in deprived areas with depression and  
12  
13 diabetes. The known influence of population age profiles on the demography of multimorbidity (19)  
14  
15 is illustrated by our finding of markedly differing alluvial plot profiles describing multimorbidity  
16  
17 acquisition in a younger cohort dominated by mental health related conditions (Figure 6) and an  
18  
19 older cohort dominated by CHD and DM (Figure 7). The inner city population in our study is  
20  
21 characterised by a much younger overall age profile compared with the national population: 8% of  
22  
23 the population of Lambeth is aged 65 years or more compared to a mean of 18% in England (21).  
24  
25 Added to this, the most socially deprived and black ethnic minority groups in our sample were  
26  
27 somewhat younger. Both factors are likely to have reduced the overall study prevalence of  
28  
29 conditions associated with ageing such as diabetes and CHD. Many multimorbidity studies do not  
30  
31 include morbid obesity within their definition (3, 17); we found morbid obesity was particularly  
32  
33 associated with social deprivation.  
34  
35  
36  
37  
38  
39

40 Several publications have reported on combinations and clusters of LTCs but few longitudinal  
41  
42 analyses have been reported (22). One study from Australia reported the order of appearance for  
43  
44 eight LTCs, reporting in detail for asthma and mood related disorders, the two LTCs most strongly  
45  
46 associated with the risk of developing a second LTC. For those with baseline asthma, there was a  
47  
48 higher subsequent risk of developing COPD and hypercholesterolaemia; for those with baseline  
49  
50 mood disorders, their risk of subsequent asthma, diabetes and other mental disorders was increased  
51  
52 (23). In a study of cardiometabolic conditions in Australia, nearly one-quarter of women initially  
53  
54 diagnosed with stroke subsequently progressed to other conditions which was a much larger  
55  
56 proportion progressing to other conditions than in those initially diagnosed with diabetes (9.9%) or  
57  
58 heart disease (11.4%) (24). A further US study explored the acquisition sequence of 20 LTCs  
59  
60

1  
2  
3 describing dyads and triads of conditions and reporting, for example, that the most common triad  
4  
5 sequence in 20-39 year olds was depression, asthma and substance misuse whereas in 50-59 year  
6  
7 olds it was hyperlipidaemia, hypertension and diabetes (25). They concluded that combinations of  
8  
9 LTCs vary extensively by age and sex. Our own findings confirm variation by age and sex, with  
10  
11 ethnicity adding to the pattern of variation. Some authors have suggested that the study of  
12  
13 acquisition sequence may imply potential interventions to prevent, minimise or delay progression  
14  
15 toward multimorbidity (23). Our findings that three cardiovascular risk factors are more strongly  
16  
17 associated with multimorbidity than deprivation and ethnicity, suggest that interventions to reduce  
18  
19 the impact of these cardiovascular risk factors may contribute to a reduction in the prevalence of  
20  
21 multimorbidity. The control of hypertension, smoking and obesity are often perceived in terms of  
22  
23 primary cardiovascular disease prevention or of secondary prevention of single LTCs but may also be  
24  
25 conceptualised in terms of multimorbidity prevention. However, a focus on cardiovascular risk  
26  
27 factors should not detract from 'the causes of the causes', since social conditions themselves  
28  
29 generate causal pathways leading from socio-economic determinants to risk behaviours (26) and  
30  
31 interventions which address health behaviours while failing to engage in social determinants may  
32  
33 paradoxically result in increased health inequalities (27).  
34  
35  
36  
37  
38

## 39 **CONCLUSION**

40  
41  
42 We have confirmed the role of age, social deprivation and ethnicity as determinants of  
43  
44 multimorbidity in an inner city multi-ethnic population and have extended previous findings  
45  
46 demonstrating the way in which the acquisition sequence of multimorbidity is patterned by these  
47  
48 determinants. Three cardiovascular risk factors, hypertension, obesity and smoking were stronger  
49  
50 determinants of multimorbidity than either deprivation or ethnicity. The strength of these  
51  
52 cardiovascular risk factors as determinants suggests interventions which may be effective in  
53  
54 reducing the prevalence, delaying the onset or slowing the progression of multimorbidity.  
55  
56  
57  
58  
59  
60

1  
2  
3 **Contributors:** MA, HD and MW contributed to the idea and design of the study. SD, DW and JC led  
4  
5 on data extraction and preparation. Statistical analysis was conducted by MA and HD. MA produced  
6  
7 the first draft of the paper; all co-authors contributed and approved the final draft. MA is the  
8  
9 guarantor. The corresponding author attests that all listed authors meet authorship criteria and that  
10  
11 no others meeting the criteria have been omitted.  
12  
13

14  
15 **Funding:** This work was supported by the Guy's and St Thomas' Charity with a grant awarded  
16  
17 November 2017. The views expressed are those of the authors and not necessarily those of the  
18  
19 funders. The findings presented are independent from the funders who have had no role in data  
20  
21 collection, data analysis or writing of the paper.  
22  
23

24 **Competing interests:** All authors have completed the ICMJE uniform disclosure form at  
25  
26 [www.icmje.org/coi\\_disclosure.pdf](http://www.icmje.org/coi_disclosure.pdf) and declare: no support from any organisation for the submitted  
27  
28 work; no financial relationships with any organisations that might have an interest in the submitted  
29  
30 work in the previous three years; no other relationships or activities that could appear to have  
31  
32 influenced the submitted work.  
33  
34

### 35 **Ethical approval**

36  
37  
38 All data were extracted under the terms of a signed Data Sharing Agreement (DSA) with each  
39  
40 practice and with project-specific approval following submission of a Data Privacy Impact  
41  
42 Assessment (DPIA), approved by Lambeth Clinical Commissioning Group (CCG) on 2/11/17.  
43  
44 Information Governance approval required 'low number suppression', ensuring that data could not  
45  
46 be displayed if the patient number was 10 or less in any given category; in these circumstances, data  
47  
48 reporting would state: '≤10 patients'. Separate Ethical Committee approval was not required (Health  
49  
50 Research Authority, personal correspondence, 29/9/17) since all data were fully anonymised for the  
51  
52 purposes of research access, and all Patient Identifiable Data (PID) had been removed.  
53  
54

55  
56 **Data sharing:** No additional data available.  
57  
58  
59  
60



## REFERENCES:

1. Palladino R, Tayu Lee J, Ashworth M, *et al.* Associations between multimorbidity, healthcare utilisation and health status: evidence from 16 European countries. *Age Ageing* 2016;45:431-5. <https://dx.doi.org/10.11606%2FS1518-8787.2018052000639>
2. Fortin M, Stewart M, Poitras ME, *et al.* A systematic review of prevalence studies on multimorbidity: toward a more uniform methodology. *Ann Fam Med* 2012;10:142-51. <https://doi.org/10.1370/afm.1337>
3. Cassell A, Edwards D, Harshfield A, *et al.* The epidemiology of multimorbidity in primary care: a retrospective cohort study. *Br J Gen Pract* 2018;68:e245-e51. <https://doi.org/10.3399/bjgp18X695465>
4. Hanlon P, Nicholl BI, Jani BD, *et al.* Frailty and pre-frailty in middle-aged and older adults and its association with multimorbidity and mortality: a prospective analysis of 493 737 UK Biobank participants. *Lancet Public Health* 2018;3:e323-e32. [https://doi.org/10.1016/S2468-2667\(18\)30091-4](https://doi.org/10.1016/S2468-2667(18)30091-4)
5. Billings J, Blunt I, Steventon A, *et al.* Development of a predictive model to identify inpatients at risk of re-admission within 30 days of discharge (PARR-30). *BMJ Open* 2012;2. <http://dx.doi.org/10.1136/bmjopen-2012-001667>
6. Huntley AL, Johnson R, Purdy S, *et al.* Measures of multimorbidity and morbidity burden for use in primary care and community settings: a systematic review and guide. *Ann Fam Med*. 2012;10:134-41. <https://doi.org/10.1370/afm.1363>
7. Roland M, Abel G. Reducing emergency admissions: are we on the right track? *Br Med J* 2012;345:e6017. <https://doi.org/10.1136/bmj.e6017>
8. From one to many. Exploring people's progression to multiple long-term conditions in an urban environment. Guy's and St Thomas' Charity. London, 2018. [https://www.gsttcharity.org.uk/sites/default/files/GSTTC\\_MLTC\\_Report\\_2018.pdf](https://www.gsttcharity.org.uk/sites/default/files/GSTTC_MLTC_Report_2018.pdf).
9. Quality and Outcomes Framework (QOF) business rules v 38 2017-2018 October code release.NHS Digital. Leeds, 2018. <https://digital.nhs.uk/data-and-information/data-collections-and-data-sets/data-collections/quality-and-outcomes-framework-qof/quality-and-outcome-framework-qof-business-rules/quality-and-outcomes-framework-qof-business-rules-v-38-2017-2018-october-code-release>.
10. Joint Formulary Committee: British National Formulary (online). London: BMJ Group and Pharmaceutical Press,<http://www.medicinescomplete.com>
11. English Indices of Deprivation 2015 - LSOA Level. Ministry of Housing, Communities and Local Government. London, 2018. <https://data.gov.uk/dataset/8f601edb-6974-417e-9c9d-85832dd2bbf2/english-indices-of-deprivation-2015-lsoa-level>
12. Lambeth, State of the borough, 2016. Lambeth Council. London, 2017. <https://www.lambeth.gov.uk/sites/default/files/State%20of%20Borough%202016%20-%20v3.pdf>
13. Statacorp. Stata Statistical Software: Release 14 2015. Available from: <http://www.stata.com/>
14. Alluvial Diagrams in ggplot2. Brunson, JC, 2018. <https://cran.r-project.org/web/packages/ggalluvial/vignettes/ggalluvial.html>
15. Harwich E, Lasko-Skinner R. Making NHS data work for everyone. Reform. London, 2018. [https://reform.uk/sites/default/files/2018-12/Making%20NHS%20data%20work%20for%20everyone%20WEB\\_1.pdf](https://reform.uk/sites/default/files/2018-12/Making%20NHS%20data%20work%20for%20everyone%20WEB_1.pdf)
16. Kendrick T, Stuart B, Newell C, *et al.* Changes in rates of recorded depression in English primary care 2003-2013: Time trend analyses of effects of the economic recession, and the GP contract quality outcomes framework (QOF). *J Affect Disord* 2015;180:68-78. <https://doi.org/10.1016/j.jad.2015.03.040>
17. Barnett K, Mercer SW, Norbury M, *et al.* Epidemiology of multimorbidity and implications for health care, research, and medical education: a cross-sectional study. *Lancet* 2012;380:37-43. [https://doi.org/10.1016/S0140-6736\(12\)60240-2](https://doi.org/10.1016/S0140-6736(12)60240-2)

- 1  
2  
3 18. McLean G, Guthrie B, Mercer SW, *et al*. General practice funding underpins the persistence of  
4 the inverse care law: cross-sectional study in Scotland. *Br J Gen Pract* 2015;65:e799-805.  
5 <https://doi.org/10.3399/bjgp15X687829>  
6  
7 19. Leiser S, Deruaz-Luyet A, N'Goran AA, *et al*. Determinants associated with deprivation in  
8 multimorbid patients in primary care-A cross-sectional study in Switzerland. *PLoS One*  
9 2017;12:e0181534. <https://doi.org/10.1371/journal.pone.0181534>  
10  
11 20. McLean G, Gunn J, Wyke S, *et al*. The influence of socioeconomic deprivation on multimorbidity  
12 at different ages: a cross-sectional study. *Br J Gen Pract* 2014;64:e440-7.  
13 <https://doi.org/10.3399/bjgp14X680545>  
14  
15 21. Lambeth. Demographic factsheet, May 2015. Lambeth & Southwark's Public Health Intelligence  
16 Team, 2015. <https://www.lambeth.gov.uk/sites/default/files/ssh-lambeth-demography-2015.pdf>  
17  
18 22. Multimorbidity: a priority for global health research. Academy of Medical Sciences. London,  
19 2018. <https://acmedsci.ac.uk/file-download/82222577>  
20  
21 23. Ruel G, Levesque JF, Stocks N, *et al*. Understanding the evolution of multimorbidity: evidences  
22 from the North West Adelaide Health Longitudinal Study (NWAHS). *PLoS One* 2014;9:e96291.  
23 <https://doi.org/10.1371/journal.pone.0096291>  
24  
25 24. Xu X, Mishra GD, Dobson AJ, *et al*. Progression of diabetes, heart disease, and stroke  
26 multimorbidity in middle-aged women: A 20-year cohort study. *PLoS Med* 2018;15:e1002516.  
27 <https://doi.org/10.1371/journal.pmed.1002516>  
28  
29 25. St Sauver JL, Boyd CM, Grossardt BR, *et al*. Risk of developing multimorbidity across all ages in an  
30 historical cohort study: differences by sex and ethnicity. *BMJ Open* 2015;5:e006413.  
31 <https://doi.org/10.1136/bmjopen-2014-006413>  
32  
33 26. Ferraro KF, Schaffer MH, Wilkinson LR. Childhood Disadvantage and Health Problems in Middle  
34 and Later Life: Early Imprints on Physical Health? *Am Sociol Rev* 2016;81:107-133.  
35 <https://doi.org/10.1177/0003122415619617>  
36  
37 27. Link BG, Phelan J. Social Conditions As Fundamental Causes of Disease. *J Health Soc Behavior*  
38 1995;(Extra Issue): 80-94. DOI: 10.2307/2626958  
39  
40  
41  
42  
43  
44  
45  
46  
47  
48  
49  
50  
51  
52  
53  
54  
55  
56  
57  
58  
59  
60

**Table 1.** Frequencies of Long Term Conditions included in the multimorbidity cohort (n = 5597 patients) compared with the remainder of the registered population and with the general population aged ≥18 years.

| Long Term Condition | Multimorbidity cohort: frequency (valid %)<br>N = 5597 | Non-Multimorbidity cohort: frequency (valid %)<br>N = 326,756 | Total Population values: frequency (valid %)<br>N = 332,353 |
|---------------------|--------------------------------------------------------|---------------------------------------------------------------|-------------------------------------------------------------|
| DM                  | 3525 (63.0%)                                           | 14,405 (4.4%)                                                 | 17,930 (5.4%)                                               |
| Chronic Pain        | 2397 (42.8%)                                           | 5813 (1.8%)                                                   | 8210 (2.5%)                                                 |
| CKD                 | 2101 (37.5%)                                           | 3470 (1.1%)                                                   | 5571 (1.7%)                                                 |
| CHD                 | 2099 (37.5%)                                           | 2668 (0.8%)                                                   | 4767 (1.4%)                                                 |
| Depression          | 2086 (37.3%)                                           | 25,877 (7.9%)                                                 | 27,963 (8.4%)                                               |
| Morbid Obesity      | 1653 (29.5%)                                           | 8883 (2.7%)                                                   | 10,486 (3.2%)                                               |
| AF                  | 1254 (22.4%)                                           | 1493 (0.5%)                                                   | 2747 (0.8%)                                                 |
| COPD                | 1247 (22.3%)                                           | 2387 (0.7%)                                                   | 3634 (1.1%)                                                 |
| Heart Failure       | 1186 (21.2%)                                           | 544 (0.2%)                                                    | 1730 (0.5%)                                                 |
| Stroke              | 1095 (19.6%)                                           | 1571 (0.5%)                                                   | 2666 (0.8%)                                                 |
| SMI                 | 692 (12.4%)                                            | 4099 (1.3%)                                                   | 4791 (1.4%)                                                 |
| Dementia            | 616 (11.0%)                                            | 738 (0.2%)                                                    | 1354 (0.4%)                                                 |

**Table 2.** Socio-demographic characteristics of multimorbidity cohort, compared with remainder of registered population aged ≥18 years.

| Demographic characteristic                                        | Multimorbidity cohort:<br>frequency (valid %)<br>N = 5597 | Non-Multimorbidity cohort:<br>frequency (valid %)<br>N = 326,756 |
|-------------------------------------------------------------------|-----------------------------------------------------------|------------------------------------------------------------------|
| Female gender                                                     | 3042 (54.4%)                                              | 161,445 (49.4%)                                                  |
| Age <65 years                                                     | 1899 (33.9%)                                              | 299,742 (91.7%)                                                  |
| Age ≥65-74 years                                                  | 1249 (22.3%)                                              | 15,992 (4.9%)                                                    |
| Age ≥75-84 years                                                  | 1479 (26.4%)                                              | 8038 (2.5%)                                                      |
| Age ≥85 years                                                     | 970 (17.3%)                                               | 2884 (0.9%)                                                      |
| White                                                             | 3022 (54.0%)                                              | 179,859 (55.0%)                                                  |
| Black                                                             | 1553 (27.7%)                                              | 58,939 (18.0%)                                                   |
| South Asian                                                       | 469 (8.4%)                                                | 22,323 (6.8%)                                                    |
| Mixed                                                             | 197 (3.5%)                                                | 15,177 (4.6%)                                                    |
| Other                                                             | 100 (1.8%)                                                | 9804 (3.0%)                                                      |
| Unknown                                                           | 256 (4.6%)                                                | 40,654 (12.4%)                                                   |
| Country of origin: UK*                                            | 1413 (46.0%)                                              | 69,675 (45.2%)                                                   |
| Language preference:<br>English*                                  | 3755 (84.0%)                                              | 240,287 (73.8%)                                                  |
| Social deprivation:<br>1 <sup>st</sup> quintile (most deprived)*  | 1500 (26.8%)                                              | 63,374 (19.4%)                                                   |
| Social deprivation:<br>2 <sup>nd</sup> quintile*                  | 1232 (22.0%)                                              | 63,073 (19.3%)                                                   |
| Social deprivation:<br>3 <sup>rd</sup> quintile*                  | 995 (17.8%)                                               | 66,409 (20.3%)                                                   |
| Social deprivation:<br>4 <sup>th</sup> quintile*                  | 1013 (18.1%)                                              | 66,334 (20.3%)                                                   |
| Social deprivation:<br>5 <sup>th</sup> quintile (least deprived)* | 828 (14.8%)                                               | 64,306 (19.7%)                                                   |

\*missing data with reduction in denominator number.

**Table 3.** Socio-demographic determinants of the multimorbidity cohort: odds ratios derived from multi-level logistic regression modelling with addition of three cardiovascular risk factors: Hypertension, Obesity (moderate), Smoking (ever).

| Demographic characteristic                                    | Adjusted odds ratio (AOR) | 95% confidence intervals for AOR |
|---------------------------------------------------------------|---------------------------|----------------------------------|
| Female gender                                                 | 1.10                      | 1.01, 1.19                       |
| Age <65 years                                                 | (reference group)         |                                  |
| Age ≥65-74 years                                              | 4.01                      | 3.69, 4.36                       |
| Age ≥75-84 years                                              | 8.12                      | 7.46, 8.83                       |
| Age ≥85 years                                                 | 15.71                     | 14.20, 17.38                     |
| White                                                         | (reference group)         |                                  |
| Black                                                         | 0.86                      | 0.80, 0.92                       |
| South Asian                                                   | 1.44                      | 1.29, 1.61                       |
| Mixed                                                         | 0.95                      | 0.81, 1.11                       |
| Other                                                         | 0.83                      | 0.67, 1.03                       |
| Unknown                                                       | 0.60                      | 0.52, 0.69                       |
| Social deprivation: 1 <sup>st</sup> quintile (most deprived)  | 1.56                      | 1.41, 1.72                       |
| Social deprivation: 2 <sup>nd</sup> quintile                  | 1.35                      | 1.22, 1.50                       |
| Social deprivation: 3 <sup>rd</sup> quintile                  | 1.18                      | 1.06, 1.31                       |
| Social deprivation: 4 <sup>th</sup> quintile                  | 1.18                      | 1.06, 1.30                       |
| Social deprivation: 5 <sup>th</sup> quintile (least deprived) | (reference group)         |                                  |
| Hypertension register                                         | 5.05                      | 4.69, 5.44                       |
| Moderate obesity                                              | 3.41                      | 3.21, 3.63                       |
| Smoker (ever)                                                 | 2.30                      | 2.16, 2.45                       |

**FIGURE LEGENDS:**

**Figures 1-7 display edited alluvial plots showing dominant patient pathways from acquisition of first to second and third Long Term Conditions.**

**Figure 1: Acquisition sequence of Long Term Conditions; dominant pathways displayed with patient flows  $\geq 35$  (n = 769).**

(FIGURE 1 ABOUT HERE)

**Footnote for all Figures:** Long Term Condition label abbreviations (n = 12): CHD = Coronary Heart Disease; STRK = Stroke; AF = Atrial Fibrillation; HF = Heart Failure; DM = Diabetes; CKD = Chronic Kidney Disease; MOBES = Morbid Obesity; Dep = Depression; SMI = Serious Mental Illness; DEM = Dementia; COPD = Chronic Obstructive Pulmonary Disease; CP = Chronic Pain.

**Figure 2: Most deprived quintile: dominant pathways displayed with patient flows  $\geq 13$  (n = 145).**

(FIGURE 2 ABOUT HERE)

**Figure 3: Least deprived quintile: dominant pathways displayed with patient flows  $\geq 8$  (n = 89).**

(FIGURE 3 ABOUT HERE)

**Figure 4: 'White' ethnic group: dominant pathways displayed with patient flows  $\geq 18$  (n = 287).**

(FIGURE 4 ABOUT HERE)

**Figure 5: 'Black' ethnic group: dominant pathways displayed with patient flows  $\geq 15$  (n = 227).**

(FIGURE 5 ABOUT HERE)

**Figure 6: Age under 65 years: dominant pathways displayed with patient flows  $\geq 25$  (n = 343).**

(FIGURE 6 ABOUT HERE)

**Figure 7: Age 65 years and over: dominant pathways displayed with patient flows  $\geq 20$  (n = 536).**

(FIGURE 7 ABOUT HERE)

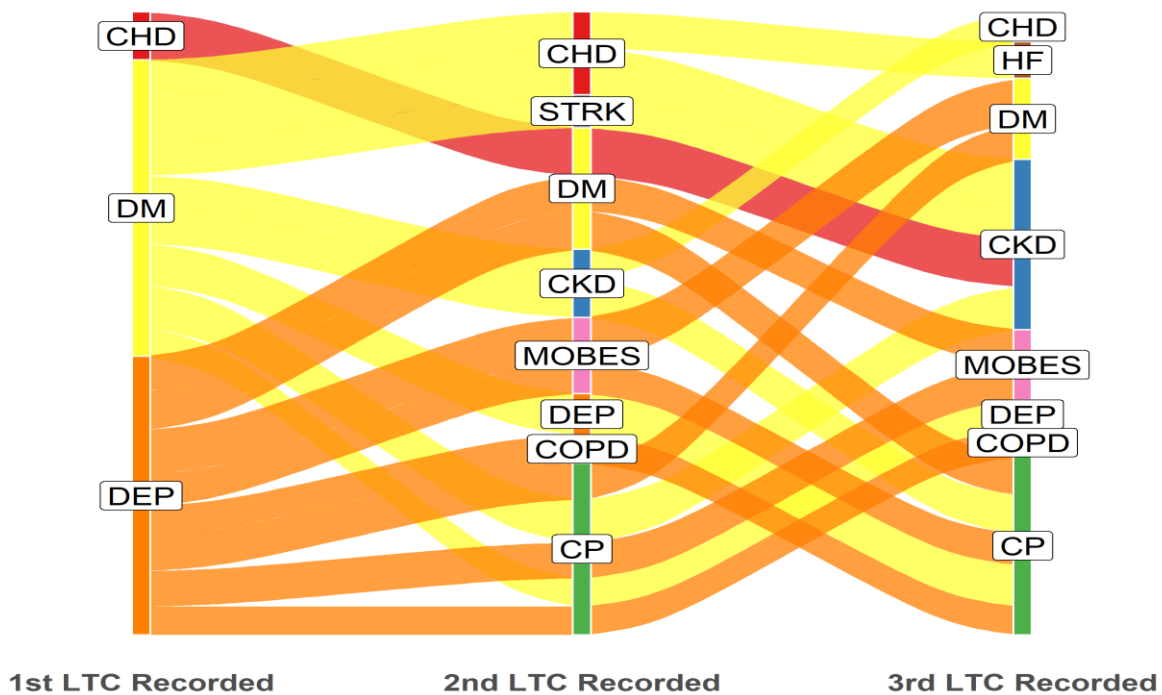

For review only

1  
2  
3  
4  
5  
6  
7  
8  
9  
10  
11  
12  
13  
14  
15  
16  
17  
18  
19  
20  
21  
22  
23  
24  
25  
26  
27  
28  
29  
30  
31  
32  
33  
34  
35  
36  
37  
38  
39  
40  
41  
42  
43  
44  
45  
46  
47  
48  
49  
50  
51  
52  
53  
54  
55  
56  
57  
58  
59  
60



review only



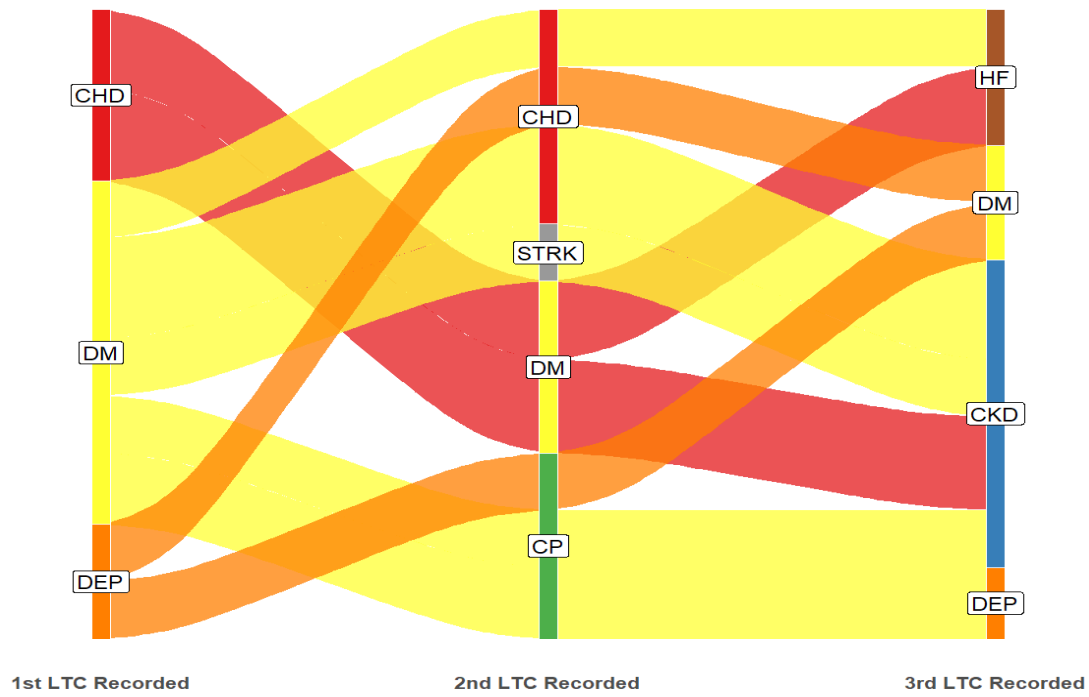

For peer review only

1  
2  
3  
4  
5  
6  
7  
8  
9  
10  
11  
12  
13  
14  
15  
16  
17  
18  
19  
20  
21  
22  
23  
24  
25  
26  
27  
28  
29  
30  
31  
32  
33  
34  
35  
36  
37  
38  
39  
40  
41  
42  
43  
44  
45  
46  
47  
48  
49  
50  
51  
52  
53  
54  
55  
56  
57  
58  
59  
60

1  
2  
3  
4  
5  
6  
7  
8  
9  
10  
11  
12  
13  
14  
15  
16  
17  
18  
19  
20  
21  
22  
23  
24  
25  
26  
27  
28  
29  
30  
31  
32  
33  
34  
35  
36  
37  
38  
39  
40  
41  
42  
43  
44  
45  
46  
47  
48  
49  
50  
51  
52  
53  
54  
55  
56  
57  
58  
59  
60



review only

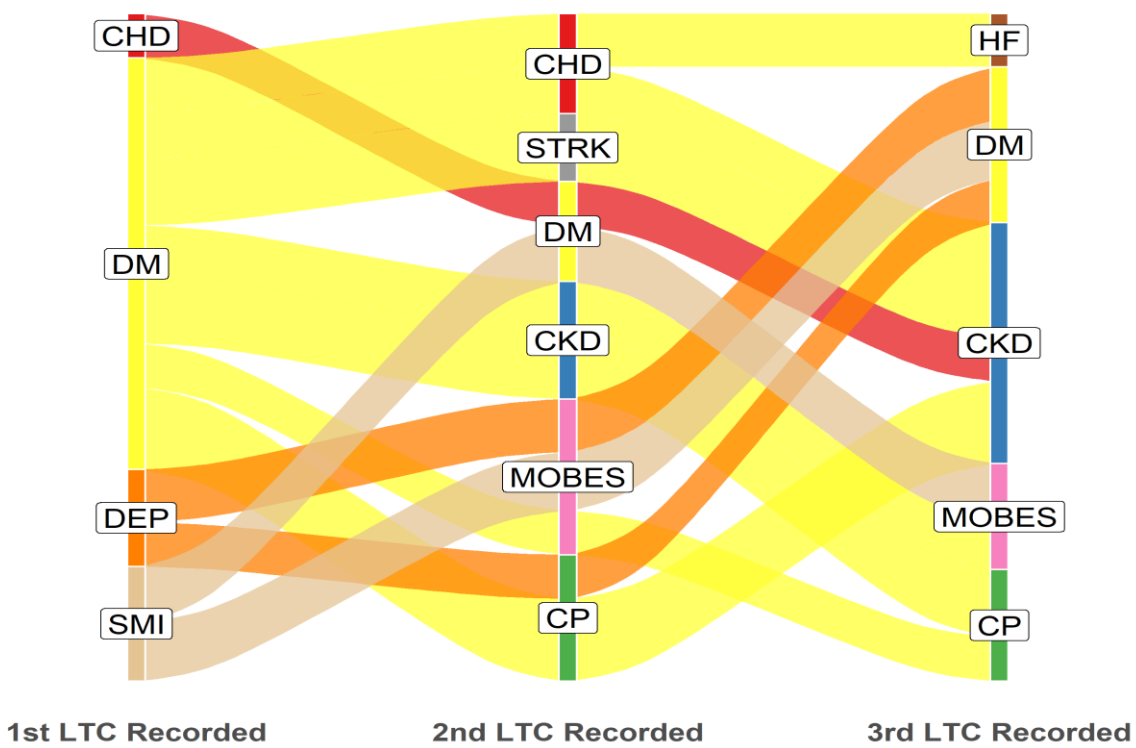

review only

1  
2  
3  
4  
5  
6  
7  
8  
9  
10  
11  
12  
13  
14  
15  
16  
17  
18  
19  
20  
21  
22  
23  
24  
25  
26  
27  
28  
29  
30  
31  
32  
33  
34  
35  
36  
37  
38  
39  
40  
41  
42  
43  
44  
45  
46  
47  
48  
49  
50  
51  
52  
53  
54  
55  
56  
57  
58  
59  
60

1  
2  
3  
4  
5  
6  
7  
8  
9  
10  
11  
12  
13  
14  
15  
16  
17  
18  
19  
20  
21  
22  
23  
24  
25  
26  
27  
28  
29  
30  
31  
32  
33  
34  
35  
36  
37  
38  
39  
40  
41  
42  
43  
44  
45  
46  
47  
48  
49  
50  
51  
52  
53  
54  
55  
56  
57  
58  
59  
60

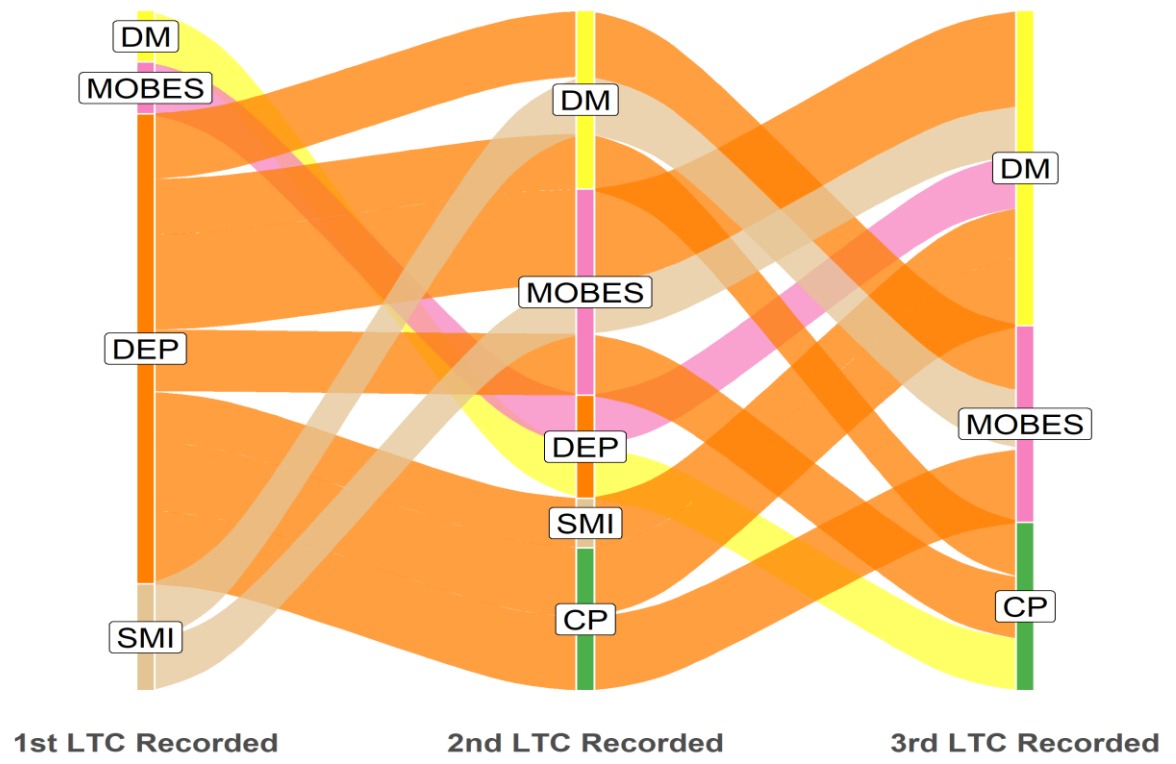

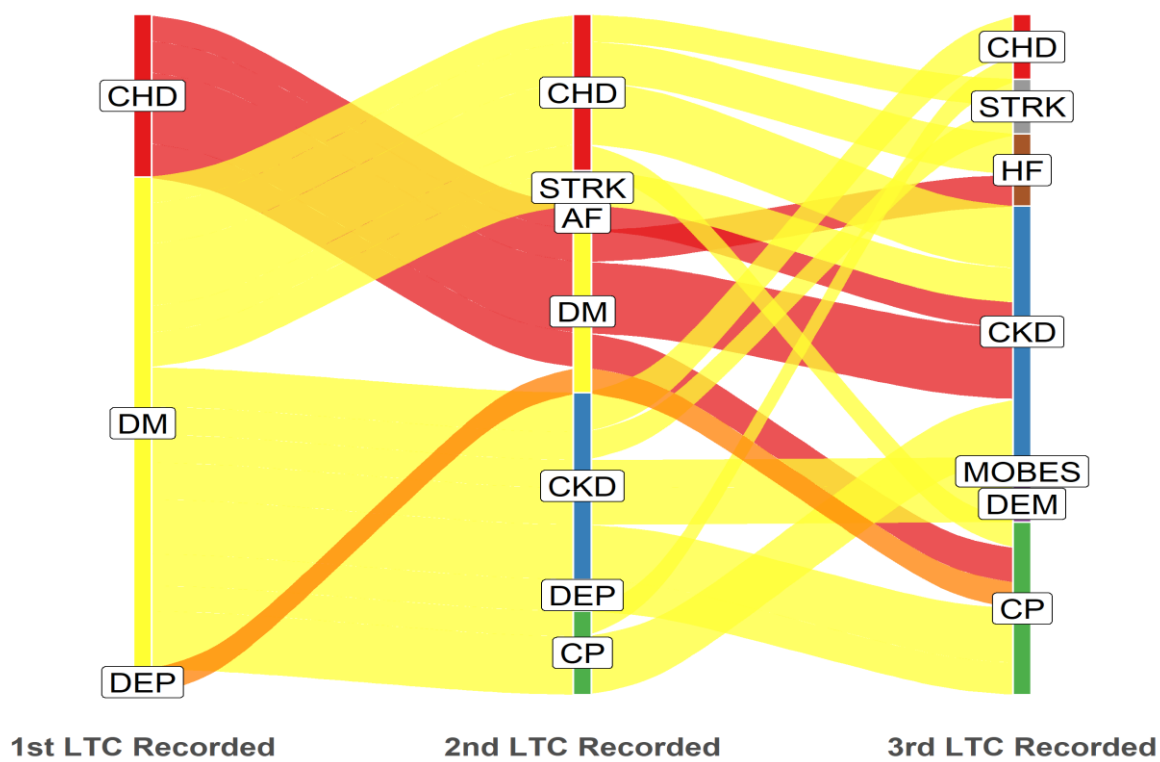

review only

1  
2  
3  
4  
5  
6  
7  
8  
9  
10  
11  
12  
13  
14  
15  
16  
17  
18  
19  
20  
21  
22  
23  
24  
25  
26  
27  
28  
29  
30  
31  
32  
33  
34  
35  
36  
37  
38  
39  
40  
41  
42  
43  
44  
45  
46  
47  
48  
49  
50  
51  
52  
53  
54  
55  
56  
57  
58  
59  
60

## Supplementary File

**Table 1.** Socio-demographic determinants of the multimorbidity cohort: adjusted odds ratios derived from multi-level logistic regression modelling.

| Demographic characteristic                                       | Adjusted odds ratio (AOR) | 95% confidence intervals for AOR |
|------------------------------------------------------------------|---------------------------|----------------------------------|
| Female gender                                                    | 1.05                      | 0.99, 1.11                       |
| Age <65 years                                                    | (reference group)         |                                  |
| Age ≥65-74 years                                                 | 11.81                     | 10.96, 12.72                     |
| Age ≥75-84 years                                                 | 27.14                     | 25.22, 29.20                     |
| Age ≥85 years                                                    | 48.70                     | 44.60, 53.18                     |
| White                                                            | (reference group)         |                                  |
| Black                                                            | 1.15                      | 1.07, 1.23                       |
| South Asian                                                      | 1.19                      | 1.07, 1.33                       |
| Mixed                                                            | 0.96                      | 0.83, 1.12                       |
| Other                                                            | 0.76                      | 0.62, 0.93                       |
| Unknown                                                          | 0.44                      | 0.38, 0.50                       |
| Social deprivation:<br>1 <sup>st</sup> quintile (most deprived)  | 1.83                      | 1.66, 2.02                       |
| Social deprivation:<br>2 <sup>nd</sup> quintile                  | 1.58                      | 1.43, 1.75                       |
| Social deprivation:<br>3 <sup>rd</sup> quintile                  | 1.27                      | 1.15, 1.40                       |
| Social deprivation:<br>4 <sup>th</sup> quintile                  | 1.21                      | 1.10, 1.33                       |
| Social deprivation:<br>5 <sup>th</sup> quintile (least deprived) | (reference group)         |                                  |

**Table 2.** Socio-demographic determinants of the multimorbidity cohort: odds ratios derived from logistic regression modelling adjusted for clustering at practice level.

| Demographic characteristic                                    | Adjusted odds ratio (AOR) | 95% confidence intervals for AOR |
|---------------------------------------------------------------|---------------------------|----------------------------------|
| Female gender                                                 | 1.05                      | 0.97, 1.13                       |
| Age <65 years                                                 | (reference group)         |                                  |
| Age ≥65-74 years                                              | 12.08                     | 10.53, 13.86                     |
| Age ≥75-84 years                                              | 27.74                     | 24.28, 31.71                     |
| Age ≥85 years                                                 | 49.84                     | 43.00, 57.78                     |
| White                                                         | (reference group)         |                                  |
| Black                                                         | 1.19                      | 1.06, 1.33                       |
| South Asian                                                   | 1.16                      | 1.00, 1.34                       |
| Mixed                                                         | 0.98                      | 0.81, 1.20                       |
| Other                                                         | 0.77                      | 0.62, 0.96                       |
| Unknown                                                       | 0.44                      | 0.36, 0.55                       |
| Social deprivation: 1 <sup>st</sup> quintile (most deprived)  | 1.96                      | 1.69, 2.26                       |
| Social deprivation: 2 <sup>nd</sup> quintile                  | 1.66                      | 1.43, 1.92                       |
| Social deprivation: 3 <sup>rd</sup> quintile                  | 1.31                      | 1.13, 1.51                       |
| Social deprivation: 4 <sup>th</sup> quintile                  | 1.24                      | 1.09, 1.42                       |
| Social deprivation: 5 <sup>th</sup> quintile (least deprived) | (reference group)         |                                  |

**Figure 1:** Area under Receiver Operating Characteristic (ROC) curve = 0.84; based on regression model presented in Table 5.

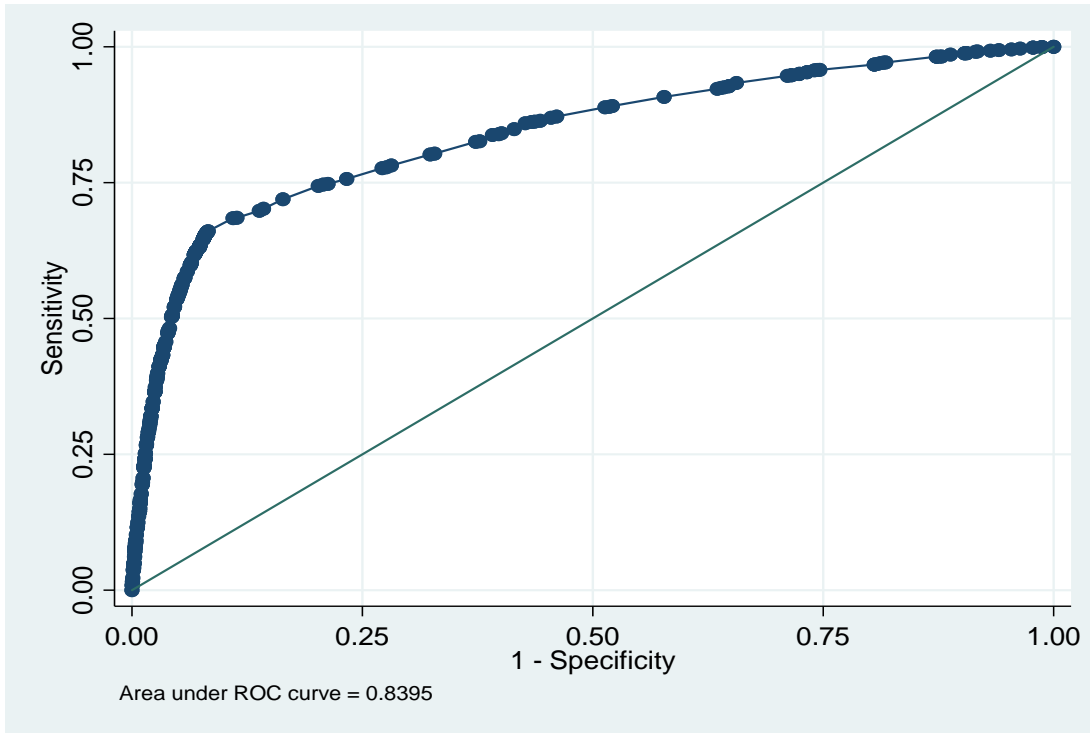

**Figure 2:** Area under Receiver Operating Characteristic (ROC) curve = 0.93; based on regression model presented in Table 5 with the addition of three risk factors: Hypertension, Smoking (ever), Obesity (moderate).

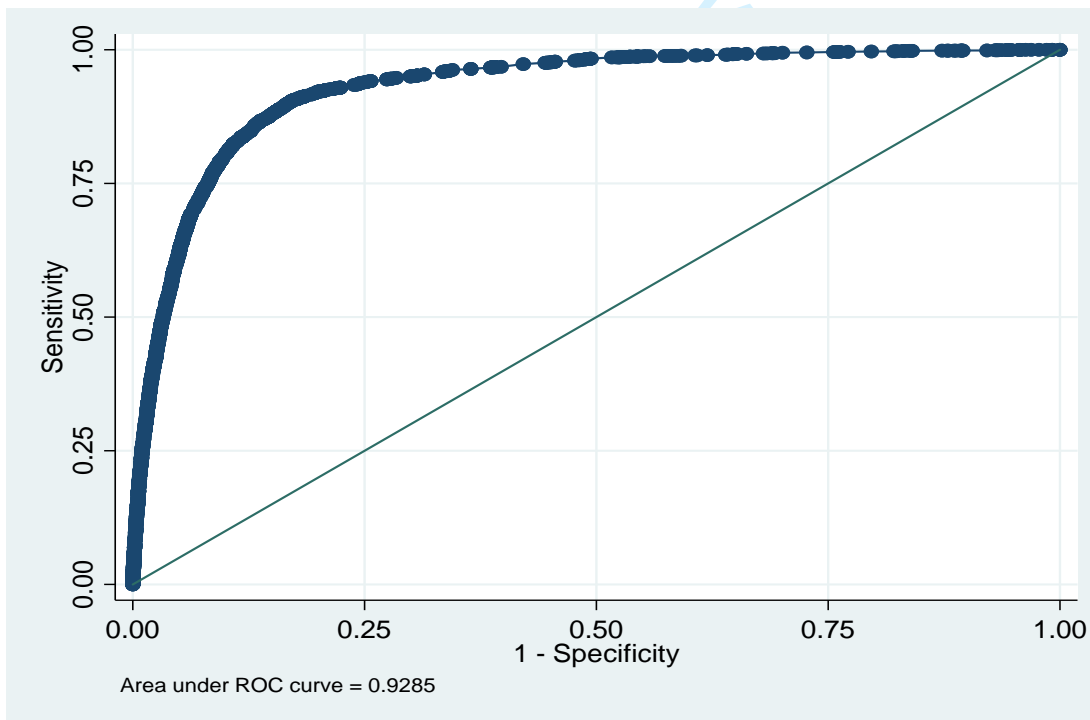



Figures 3-7 display un-edited alluvial plots for all available data. The figures in the main paper display alluvial plots edited to show dominant pathways.

**Figure 3:** Acquisition sequence of Long Term Conditions in the multimorbidity cohort (n = 5196); data excluded if simultaneous onset dates.

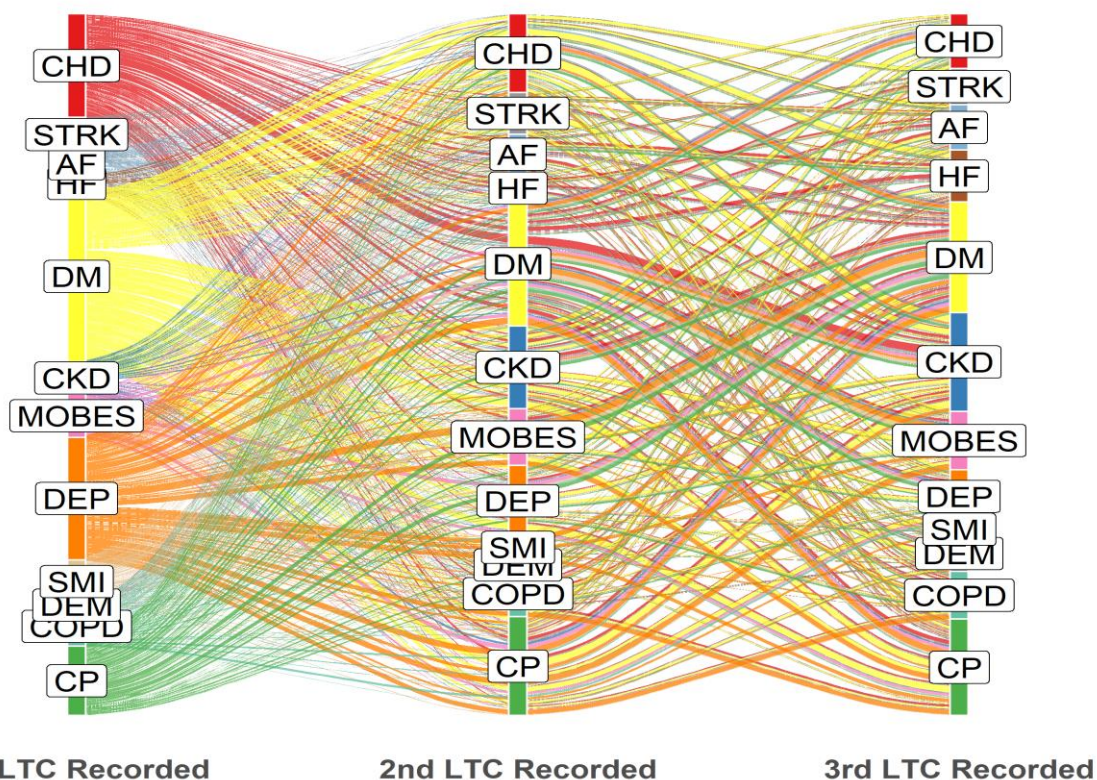

Long Term Condition label abbreviations (n = 12): CHD = Coronary Heart Disease; STRK = Stroke; AF = Atrial Fibrillation; HF = Heart Failure; DM = Diabetes; CKD = Chronic Kidney Disease; MOBES = Morbid Obesity; Dep = Depression; SMI = Serious Mental Illness; DEM = Dementia; COPD = Chronic Obstructive Pulmonary Disease; CP = Chronic Pain.

**Figure 4:** Most deprived quintile: alluvial plot displaying acquisition sequence of Long Term Conditions in the multimorbidity cohort (n = 1394).

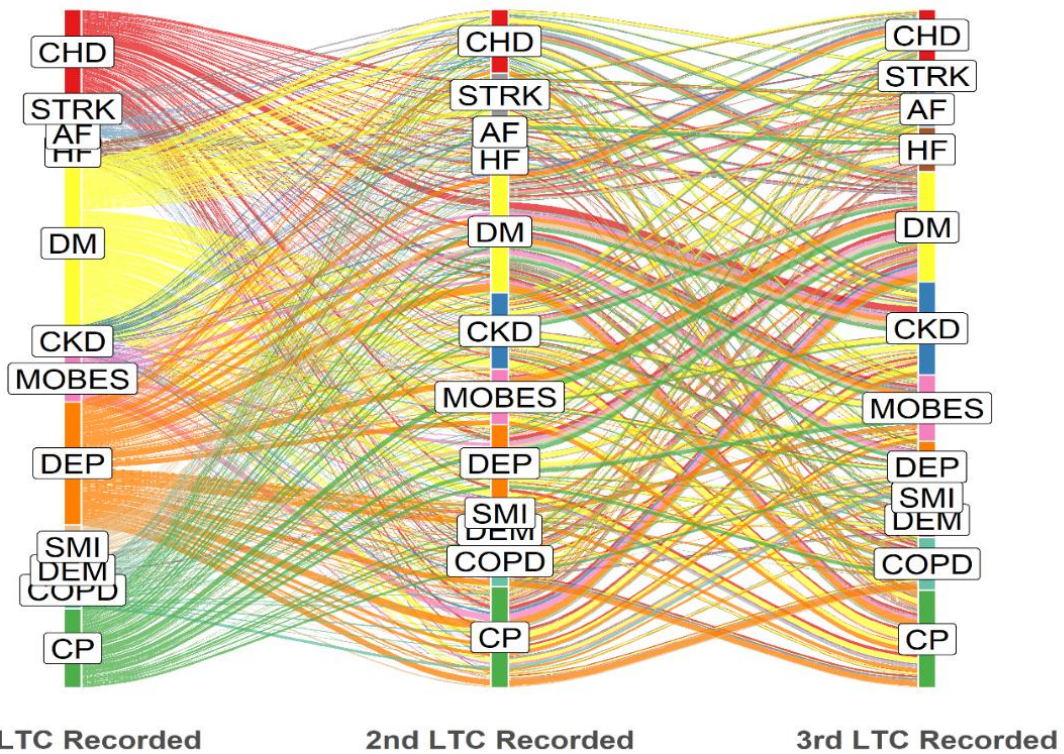

**Figure 5:** Least deprived quintile: alluvial plot displaying acquisition sequence of Long Term Conditions in the multimorbidity cohort (n = 763).

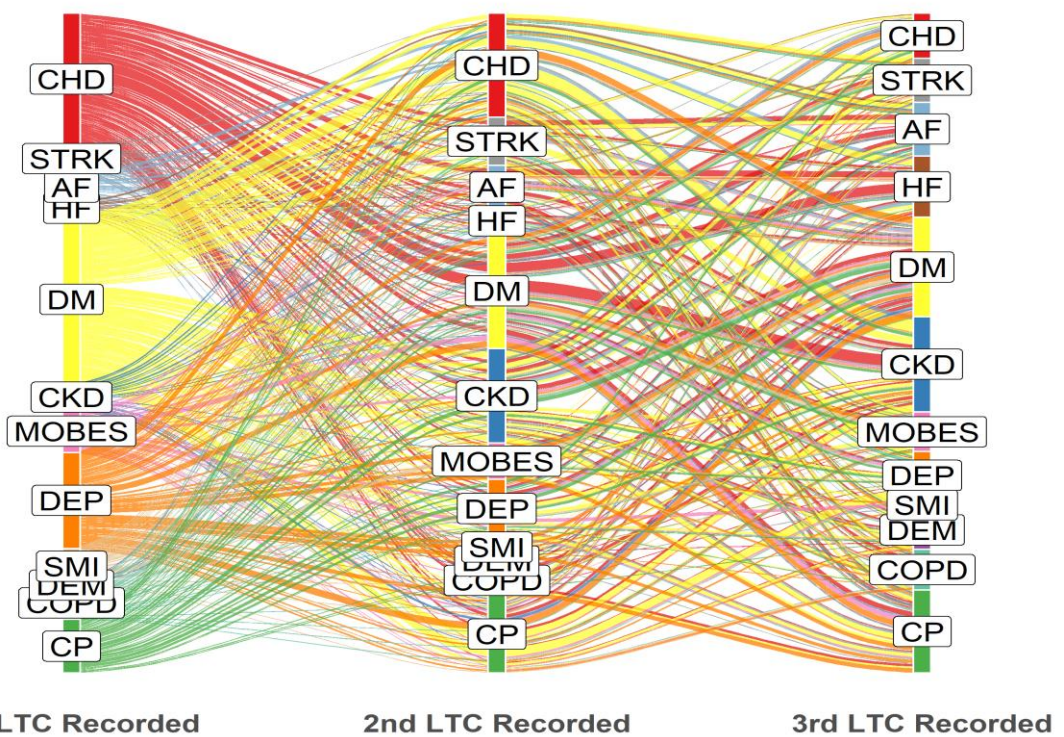

**Figure 6:** ‘White’ ethnic group: alluvial plot displaying acquisition sequence of Long Term Conditions in the multimorbidity cohort (n = 2788).



**Figure 7:** ‘Black’ ethnic group: alluvial plot displaying acquisition sequence of Long Term Conditions in the multimorbidity cohort (n = 1448).



STROBE Statement—checklist of items that should be included in reports of observational studies

|                           | Item No. | Recommendation                                                                                      | Page No. | Relevant text from manuscript                                                                                                                                                                                                                                                                                                                                                                                                                                                                                                                                                                                                   |
|---------------------------|----------|-----------------------------------------------------------------------------------------------------|----------|---------------------------------------------------------------------------------------------------------------------------------------------------------------------------------------------------------------------------------------------------------------------------------------------------------------------------------------------------------------------------------------------------------------------------------------------------------------------------------------------------------------------------------------------------------------------------------------------------------------------------------|
| <b>Title and abstract</b> | 1        | (a) Indicate the study’s design with a commonly used term in the title or the abstract              | 1        | “Cross-sectional analysis and longitudinal study”                                                                                                                                                                                                                                                                                                                                                                                                                                                                                                                                                                               |
|                           |          | (b) Provide in the abstract an informative and balanced summary of what was done and what was found | 1        | Summarised in Abstract: Design, Setting, Participants, Main outcome measures, Results                                                                                                                                                                                                                                                                                                                                                                                                                                                                                                                                           |
| <b>Introduction</b>       |          |                                                                                                     |          |                                                                                                                                                                                                                                                                                                                                                                                                                                                                                                                                                                                                                                 |
| Background/rationale      | 2        | Explain the scientific background and rationale for the investigation being reported                | 3-4      | The association between multimorbidity, <del>and</del> social determinants and risk factors, <u>and acquisition sequence of Long Term Conditions</u> has not previously been determined in a deprived multi-ethnic community; identifying both the determinants of multimorbidity and the acquisition sequence may suggest interventions to prevent multimorbidity or slow its progression. For the purposes of this study, a locally derived definition of ‘multimorbidity’ has been used based on predicted high healthcare and social care demand. In contrast, most previously reported studies of multimorbidity have more |

For peer review only

1  
2  
3  
4  
5  
6  
7  
8  
9  
10  
11  
12  
13  
14  
15  
16  
17  
18  
19  
20  
21  
22  
23  
24  
25  
26  
27  
28  
29  
30  
31  
32  
33  
34  
35  
36  
37  
38  
39  
40  
41  
42  
43  
44  
45  
46

|                |   |                                                                                                                                                                                                                                                                                                                                                                                                                                                                                    |     |                                                                                                                                                                                                                                                                                                                                                                                                                               |
|----------------|---|------------------------------------------------------------------------------------------------------------------------------------------------------------------------------------------------------------------------------------------------------------------------------------------------------------------------------------------------------------------------------------------------------------------------------------------------------------------------------------|-----|-------------------------------------------------------------------------------------------------------------------------------------------------------------------------------------------------------------------------------------------------------------------------------------------------------------------------------------------------------------------------------------------------------------------------------|
|                |   |                                                                                                                                                                                                                                                                                                                                                                                                                                                                                    |     | inclusive definitions of multimorbidity.                                                                                                                                                                                                                                                                                                                                                                                      |
| Objectives     | 3 | State specific objectives, including any prespecified hypotheses                                                                                                                                                                                                                                                                                                                                                                                                                   | 1   | “To study the social determinants and risk factors for multimorbidity and the acquisition sequence of multimorbidity”                                                                                                                                                                                                                                                                                                         |
| <b>Methods</b> |   |                                                                                                                                                                                                                                                                                                                                                                                                                                                                                    |     |                                                                                                                                                                                                                                                                                                                                                                                                                               |
| Study design   | 4 | Present key elements of study design early in the paper                                                                                                                                                                                                                                                                                                                                                                                                                            | 5   | Presented under ‘Data Variables’ and ‘Data Analysis’.                                                                                                                                                                                                                                                                                                                                                                         |
| Setting        | 5 | Describe the setting, locations, and relevant dates, including periods of recruitment, exposure, follow-up, and data collection                                                                                                                                                                                                                                                                                                                                                    | 3   | Presented under ‘Study Setting’, ‘Study Design’, ‘Study population’.                                                                                                                                                                                                                                                                                                                                                          |
| Participants   | 6 | <p>(a) <i>Cohort study</i>—Give the eligibility criteria, and the sources and methods of selection of participants. Describe methods of follow-up</p> <p><i>Case-control study</i>—Give the eligibility criteria, and the sources and methods of case ascertainment and control selection. Give the rationale for the choice of cases and controls</p> <p><i>Cross-sectional study</i>—Give the eligibility criteria, and the sources and methods of selection of participants</p> | 4-5 | <p>Cross-sectional study: all patients <b>currently (on the data of data extraction)</b> registered at general practices in one south London borough (Lambeth) with the exception of those with an ‘informed dissent’ code in their case-notes.</p> <p>Longitudinal component: the same cohort of patients studied <b>retrospectively</b> from onset of first Long Term Condition (LTC) to acquisition of 3 or more LTCs.</p> |
|                |   | (b) <i>Cohort study</i> —For matched studies, give matching criteria and number of exposed and unexposed                                                                                                                                                                                                                                                                                                                                                                           |     |                                                                                                                                                                                                                                                                                                                                                                                                                               |

|                           |    |                                                                                                                                                                                      |     |                                                                                                                                                                                                                                                                                                                         |
|---------------------------|----|--------------------------------------------------------------------------------------------------------------------------------------------------------------------------------------|-----|-------------------------------------------------------------------------------------------------------------------------------------------------------------------------------------------------------------------------------------------------------------------------------------------------------------------------|
|                           |    | <i>Case-control study</i> —For matched studies, give matching criteria and the number of controls per case                                                                           |     |                                                                                                                                                                                                                                                                                                                         |
| Variables                 | 7  | Clearly define all outcomes, exposures, predictors, potential confounders, and effect modifiers. Give diagnostic criteria, if applicable                                             | 5   | Summarised under the heading, ‘Data Variables’: “...routinely collected, anonymised, patient-level Read, EMIS and SNOMED coded information. Data were extracted from the EHR into a secure data warehouse .....and contained information on patient demographic characteristics, LTCs, clinical values and medication.” |
| Data sources/ measurement | 8* | For each variable of interest, give sources of data and details of methods of assessment (measurement). Describe comparability of assessment methods if there is more than one group | 5   | All data was derived from the Electronic Health Record of patients registered at GP practices in the sample area.                                                                                                                                                                                                       |
| Bias                      | 9  | Describe any efforts to address potential sources of bias                                                                                                                            | 5-6 | Patient records were all included in the analysis, reducing sampling bias. However, 4.0% of patients had an ‘informed dissent’ code in their case-notes, prohibiting any access to data. We were therefore unable to determine if the omission of these patients may have introduced bias                               |
| Study size                | 10 | Explain how the study size was arrived at                                                                                                                                            | 5-6 | As above – the sample of 332,353 patients represented all patients registered at GP                                                                                                                                                                                                                                     |

For peer review only

practices in the study area, with the exception of those with informed dissent codes. All Odds Ratios were presented with 95% CI's so that the effect of small numbers on the CI could be seen

Continued on next page

For peer review only

|                        |     |                                                                                                                                                                                                                                                                                                           |            |                                                                                                                                                                              |
|------------------------|-----|-----------------------------------------------------------------------------------------------------------------------------------------------------------------------------------------------------------------------------------------------------------------------------------------------------------|------------|------------------------------------------------------------------------------------------------------------------------------------------------------------------------------|
| Quantitative variables | 11  | Explain how quantitative variables were handled in the analyses. If applicable, describe which groupings were chosen and why                                                                                                                                                                              | 5/6        | Quantitative variables analysed according to description in section headed, 'Data Analysis'.                                                                                 |
| Statistical methods    | 12  | (a) Describe all statistical methods, including those used to control for confounding                                                                                                                                                                                                                     | 5/6        | Regression modelling – see 'Data Analysis'                                                                                                                                   |
|                        |     | (b) Describe any methods used to examine subgroups and interactions                                                                                                                                                                                                                                       | 6          | Sub-groups of the key predictor variables were stratified (into age bands, deprivation quintiles, major ethnic groups)                                                       |
|                        |     | (c) Explain how missing data were addressed                                                                                                                                                                                                                                                               | 5/6        | See section on missing demographic codes, missing clinical codes, 'informed dissent codes'.                                                                                  |
|                        |     | (d) <i>Cohort study</i> —If applicable, explain how loss to follow-up was addressed<br><i>Case-control study</i> —If applicable, explain how matching of cases and controls was addressed<br><i>Cross-sectional study</i> —If applicable, describe analytical methods taking account of sampling strategy | n/a        | The study was not a sample                                                                                                                                                   |
|                        |     | (e) Describe any sensitivity analyses                                                                                                                                                                                                                                                                     | 8          | See heading 'Sensitivity analyses'                                                                                                                                           |
| <b>Results</b>         |     |                                                                                                                                                                                                                                                                                                           |            |                                                                                                                                                                              |
| Participants           | 13* | (a) Report numbers of individuals at each stage of study—eg numbers potentially eligible, examined for eligibility, confirmed eligible, included in the study, completing follow-up, and analysed                                                                                                         | 6/7        | Summarised under 'Multimorbidity cohort characteristics'.                                                                                                                    |
|                        |     | (b) Give reasons for non-participation at each stage                                                                                                                                                                                                                                                      | n/a        | n/a (exclusion criteria stated above)                                                                                                                                        |
|                        |     | (c) Consider use of a flow diagram                                                                                                                                                                                                                                                                        | n/a        | Exclusion criteria summarised on pg4-6 without use of a Flow diagram                                                                                                         |
| Descriptive data       | 14* | (a) Give characteristics of study participants (eg demographic, clinical, social) and information on exposures and potential confounders                                                                                                                                                                  | Tables 1,2 | Table 1 summarises, 'Frequencies of Long Term Conditions included in the multimorbidity cohort'; Table 2 summarises, 'Demographic characteristics of multimorbidity cohort'. |



|              |     |                                                                                                                                                                                                              |            |                                                                                                                                                                                                                       |
|--------------|-----|--------------------------------------------------------------------------------------------------------------------------------------------------------------------------------------------------------------|------------|-----------------------------------------------------------------------------------------------------------------------------------------------------------------------------------------------------------------------|
|              |     | (b) Indicate number of participants with missing data for each variable of interest                                                                                                                          | 5/6        | Missing data numbers summarised under, 'Multimorbidity cohort characteristics'                                                                                                                                        |
|              |     | (c) <i>Cohort study</i> —Summarise follow-up time (eg, average and total amount)                                                                                                                             | n/a        |                                                                                                                                                                                                                       |
| Outcome data | 15* | <i>Cohort study</i> —Report numbers of outcome events or summary measures over time                                                                                                                          | n/a        |                                                                                                                                                                                                                       |
|              |     | <i>Case-control study</i> —Report numbers in each exposure category, or summary measures of exposure                                                                                                         | n/a        |                                                                                                                                                                                                                       |
|              |     | <i>Cross-sectional study</i> —Report numbers of outcome events or summary measures                                                                                                                           | 13         | Summary measures in Table 2                                                                                                                                                                                           |
| Main results | 16  | (a) Give unadjusted estimates and, if applicable, confounder-adjusted estimates and their precision (eg, 95% confidence interval). Make clear which confounders were adjusted for and why they were included | Tables 1-5 | Univariable analysis presented in Tables 1, 2. Multivariable analysis presented in Tables 3,4,5. Table 3 includes different confounder variables to Tables 4,5. All confounder variables are presented in the Tables. |
|              |     | (b) Report category boundaries when continuous variables were categorized                                                                                                                                    | Tables 2-5 | Continuous variables were categorised: 'age' into 3 age bands; social deprivation into quintiles                                                                                                                      |
|              |     | (c) If relevant, consider translating estimates of relative risk into absolute risk for a meaningful time period                                                                                             | n/a        | The study was about the high risk of multimorbidity in specified groups, comparing the power of risk factors.                                                                                                         |

Continued on next page

|                          |    |                                                                                                                                                                            |                               |                                                                                                                                                                                   |
|--------------------------|----|----------------------------------------------------------------------------------------------------------------------------------------------------------------------------|-------------------------------|-----------------------------------------------------------------------------------------------------------------------------------------------------------------------------------|
| Other analyses           | 17 | Report other analyses done—eg analyses of subgroups and interactions, and sensitivity analyses                                                                             | Table 5; Supplementary file 1 | Sensitivity analyses summarised: logistic regression adjusted for clustering; Receiver Operating Characteristic curve                                                             |
| <b>Discussion</b>        |    |                                                                                                                                                                            |                               |                                                                                                                                                                                   |
| Key results              | 18 | Summarise key results with reference to study objectives                                                                                                                   | 13/14                         | Key finding summarised at opening of Discussion. The demographic and risk factors for multimorbidity are defined. The acquisition sequence of multimorbidity is described.        |
| Limitations              | 19 | Discuss limitations of the study, taking into account sources of potential bias or imprecision. Discuss both direction and magnitude of any potential bias                 | 14/15                         | Discussed under heading, ‘Strengths and Limitations’                                                                                                                              |
| Interpretation           | 20 | Give a cautious overall interpretation of results considering objectives, limitations, multiplicity of analyses, results from similar studies, and other relevant evidence | 15-17                         | Cautious interpretation summarised with reference to the literature. Cautious conclusion reached about possible interventions to prevent or delay multimorbidity onset.           |
| Generalisability         | 21 | Discuss the generalisability (external validity) of the study results                                                                                                      | 14/15                         | Summarised under, ‘Strengths and Limitations’. Findings were derived from one deprived, multi-ethnic community and may not generalise to less deprived, less diverse populations. |
| <b>Other information</b> |    |                                                                                                                                                                            |                               |                                                                                                                                                                                   |
| Funding                  | 22 | Give the source of funding and the role of the funders for the present study and, if applicable, for the original study on which the present article is based              | 18/19                         | The study was funded by the Guy’s and St Thomas’ Charity                                                                                                                          |

\*Give information separately for cases and controls in case-control studies and, if applicable, for exposed and unexposed groups in cohort and cross-sectional studies.

1  
2 **Note:** An Explanation and Elaboration article discusses each checklist item and gives methodological background and published examples of transparent reporting. The STROBE  
3 checklist is best used in conjunction with this article (freely available on the Web sites of PLoS Medicine at <http://www.plosmedicine.org/>, Annals of Internal Medicine at  
4 <http://www.annals.org/>, and Epidemiology at <http://www.epidem.com/>). Information on the STROBE Initiative is available at [www.strobe-statement.org](http://www.strobe-statement.org).  
5  
6  
7  
8  
9  
10  
11  
12  
13  
14  
15  
16  
17  
18  
19  
20  
21  
22  
23  
24  
25  
26  
27  
28  
29  
30  
31  
32  
33  
34  
35  
36  
37  
38  
39  
40  
41  
42  
43  
44  
45  
46

For peer review only
